# Supplementary material
Source: publisher figshare collection journal article supplement (https://tandf.figshare.com/articles/dataset/_/7731164)
Supplement: Supplementary file 1 [file 1]

Supplemental Table 1

| Supplemental Table 1. Description of primers and DNA template used for cloning through splice overlap extension (SOE) PCR, sequencing, conventional and real time PCR |          |                        |                                                               |                                                                           |                                                 |                     |
|-----------------------------------------------------------------------------------------------------------------------------------------------------------------------|----------|------------------------|---------------------------------------------------------------|---------------------------------------------------------------------------|-------------------------------------------------|---------------------|
| Oligo Name                                                                                                                                                            | *S or AS | Clone Names            | Oligo Sequence                                                | DNA template used for SOE PCR                                             | **Nucleotide (nt) Position and/or Reference     | Virus Region & Gene |
| OTR 787                                                                                                                                                               | S        | Universal Outer Primer | 5' cc ctcgagT GTC CGG AGC CGT GCT GCC CG 3'                   | These oligos were used as universal outer primers to generate each mutant | 2 dummies, <i>XhoI</i> , nt 7-21                | MPMV 5' LTR         |
| OTR 788                                                                                                                                                               | AS       |                        | 5' ccc gga tcc TTC TTT CTT ATC TAT CAA TTC TTT AAT TAA G 3'   |                                                                           | 3 dummies, <i>BamHI</i> , MPMV nt 1171-1141     | MPMV Gag            |
| OTR 1079                                                                                                                                                              | S        | RK15                   | 5' CTC TCG AAA GTA AGT GTT GCG CTC GG 3'                      | SJ2                                                                       | MPMV nt 829-886 with deletion from nt 834-866   | MPMV U5             |
| OTR 1080                                                                                                                                                              | AS       |                        | 5' CTT TCG AGA GTT TAC TTT CAC TTT TAA TC 3'                  |                                                                           | MPMV nt 867- 810 with deletion from nt 832-870  | MPMV U5             |
| OTR 1085                                                                                                                                                              | S        | RK16                   | 5' GCT GAT ACT TGT CCT TGG TTT CCG C 3'                       | SJ2                                                                       | MPMV nt 974-1029 with deletion from nt 979-1008 | MPMV Gag            |
| OTR 1086                                                                                                                                                              | AS       |                        | 5' CAA GTA TCA GCA TAT TTA ACC TTT ACT CC 3'                  |                                                                           | MPMV nt 1014-956 with deletion from nt 979-1008 | MPMV Gag            |
| OTR 1194                                                                                                                                                              | S        | RK17                   | 5' TTA AAG ACA CGG GGA GTA AAG G 3'                           | SJ2                                                                       | MPMV nt 944-965                                 | MPMV Gag            |
| OTR 1195                                                                                                                                                              | AS       |                        | 5' TAC TCC CCG TGT CTT TAA TAA TTC TTG CCC CAT ATC CGA G 3'   |                                                                           | MPMV nt 961-883 with deletion from nt 905-943   | MPMV Gag            |
| OTR 1194                                                                                                                                                              | S        | RK18                   | 5' TTA AAG ACA CGG GGA GTA AAG G 3'                           | RK15                                                                      | MPMV nt 944-965                                 | MPMV Gag            |
| OTR 1195                                                                                                                                                              | AS       |                        | 5' TAC TCC CCG TGT CTT TAA TAA TTC TTG CCC CAT ATC CGA G 3'   |                                                                           | MPMV nt 961-883 with deletion from nt 905-943   | MPMV Gag            |
| OTR 1196                                                                                                                                                              | S        | RK19                   | 5' TAC TTG TCC TTG GTT TCC GCA A3'                            | RK15                                                                      | MPMV nt 1009-1030                               | MPMV Gag            |
| OTR 1197                                                                                                                                                              | AS       |                        | 5' GGA AAC CAA GGA CAA GTA TCA GCA TAT TTA ACC TTT ACT CCC 3' |                                                                           | MPMV nt 1026-955 with deletion from nt 979-1008 | MPMV Gag            |
| OTR 1194                                                                                                                                                              | S        | RK20                   | 5' TTA AAG ACA CGG GGA GTA AAG G 3'                           | RK19                                                                      | MPMV nt 944-965                                 | MPMV Gag            |
| OTR 1195                                                                                                                                                              | AS       |                        | 5' TAC TCC CCG TGT CTT TAA TAA TTC TTG CCC CAT ATC CGA G 3'   |                                                                           | MPMV nt 961-883 with deletion from nt 905-943   | MPMV Gag            |

|                       |    |                                            |                                                                                                                                  |                   |                                                       |                                          |
|-----------------------|----|--------------------------------------------|----------------------------------------------------------------------------------------------------------------------------------|-------------------|-------------------------------------------------------|------------------------------------------|
| OTR 1196              | S  | RK21                                       | 5' TAC TTG TCC TTG GTT TCC GCA A3'                                                                                               | RK16              | MPMV nt 1009-1030                                     | MPMV Gag                                 |
| OTR 1197              | AS |                                            | 5' GGA AAC CAA GGA CAA GTA TCA GCA TAT TTA ACC TTT ACT CCC 3'                                                                    |                   | MPMV nt 1026-955<br>with deletion from<br>nt 979-1008 | MPMV Gag                                 |
| IDT gene<br>synthesis | -  | RK22                                       | Mutant RK 26 containing substitution between Gag SL1 and Gag SL2 sequences<br>was created through gene synthesis provided by IDT | gene<br>synthesis | -                                                     | MPMV Gag                                 |
|                       | -  |                                            |                                                                                                                                  |                   | -                                                     | MPMV Gag                                 |
| OTR 121               | S  | Used for<br>sequencing                     | 5' GGT TAA ATA TGC TGA TCT TT 3'                                                                                                 |                   | MPMV nt 964-983                                       | MPMV Gag                                 |
| OTR 198               | S  |                                            | 5' ccc gct agc CGC CTA CTC TAC GCC 3'                                                                                            |                   | MPMV nt 1070-1056                                     | MPMV Gag                                 |
| OTR 580               | S  | β-actin                                    | 5' TGA GCT GCG TGT GGC TCC 3'                                                                                                    |                   | <i>J. Virol.</i> 69:5607-5620.                        | Actin<br>Spliced                         |
| OTR 581               | AS |                                            | 5' GGC ATG GGG GAG GGC ATA CC 3'                                                                                                 |                   | <i>J. Virol.</i> 69:5607-5620.                        | Actin<br>Spliced or<br>unspliced<br>mRNA |
| OTR 582               | S  |                                            | 5' CCA GTG GCT TCC CCA GTG 3'                                                                                                    |                   | <i>J. Virol.</i> 69:5607-5620.                        | Actin S-1.<br>Unspliced<br>mRNA          |
| OTR 1161              | S  | For PCR<br>following<br>DNase<br>treatment | 5' GAT CAG AAC ACT GTC TTG TC 3'                                                                                                 |                   | MPMV nt 642-661                                       | MPMV<br>R/U5                             |
| OTR 1163              | AS |                                            | 5' CTT TCT TAT CTA TCA ATT CTT TAA 3'                                                                                            |                   | MPMV nt 1169-1146                                     | MPMV Gag                                 |
| MPMV_M<br>FAM         | -  | qPCR probe                                 | 5' TCGGGACAGTTGGC 3'                                                                                                             |                   | MPMV nt 734-747                                       | MPMV U5                                  |
| MPMV_F                | S  | qPCR Forward<br>primer                     | 5' CTCCTCCAGGTTCTACTGTTGA 3'                                                                                                     |                   | MPMV nt 702-724                                       | MPMV U5                                  |
| MPMV_R                | AS | qPCR Reverse<br>Primer                     | 5' TCGTATCCAGCCCCACGTT 3'                                                                                                        |                   | MPMV nt 770-752                                       | MPMV U5                                  |

Sequence in lower case: artificial and restriction enzyme sequences that were introduced in the oligos.

\*S, sense; AS, antisense.

\*\* The MPMV nucleotide numbering system refers to the genome sequence deposited in the Genbank (accession number M12349) by Sonigo et al. 1986.
