# Supplementary material
Source: publisher figshare collection journal article supplement (https://tandf.figshare.com/articles/dataset/_/7731164)
Supplement: Supplementary file 2 [file 1]

Supplemental Table 2

**SJ2**

| seqNum | seqRNA | Mean value | Standard dev. |
|--------|--------|------------|---------------|
| 13     | U      | 0.086667   | 0.122565      |
| 14     | G      | 0.000000   | 0.000000      |
| 15     | A      | 0.000000   | 0.000000      |
| 16     | G      | 0.000000   | 0.000000      |
| 17     | A      | 0.023333   | 0.032998      |
| 18     | C      | 0.060000   | 0.008165      |
| 19     | U      | 0.026667   | 0.020548      |
| 20     | U      | 0.133333   | 0.049889      |
| 21     | G      | 0.093333   | 0.062361      |
| 22     | A      | 0.810000   | 0.092736      |
| 23     | U      | 1.760000   | 0.280832      |
| 24     | C      | 0.296667   | 0.094281      |
| 25     | A      | 0.113333   | 0.020548      |
| 26     | G      | 0.610000   | 0.112250      |
| 27     | A      | 1.770000   | 0.212289      |
| 28     | A      | 2.183333   | 0.175942      |
| 29     | C      | 1.756667   | 0.130213      |
| 30     | A      | 1.923333   | 0.279802      |
| 31     | C      | 0.220000   | 0.024495      |
| 32     | U      | 0.033333   | 0.040277      |
| 33     | G      | 0.006667   | 0.009428      |
| 34     | U      | 0.000000   | 0.000000      |
| 35     | C      | 0.073333   | 0.032998      |
| 36     | U      | 0.000000   | 0.000000      |
| 37     | U      | 0.040000   | 0.008165      |
| 38     | G      | 0.090000   | 0.021602      |
| 39     | U      | 0.000000   | 0.000000      |
| 40     | C      | 0.036667   | 0.020548      |
| 41     | U      | 0.003333   | 0.004714      |
| 42     | C      | 0.943333   | 0.186250      |
| 43     | C      | 1.186667   | 0.143836      |
| 44     | A      | 0.200000   | 0.092014      |
| 45     | U      | 0.513333   | 0.073182      |
| 46     | U      | 0.330000   | 0.057155      |
| 47     | U      | 0.290000   | 0.063770      |
| 48     | C      | 0.016667   | 0.023570      |
| 49     | U      | 0.060000   | 0.045461      |
| 50     | U      | 0.243333   | 0.062361      |
| 51     | G      | 0.010000   | 0.014142      |
| 52     | U      | 0.066667   | 0.026247      |
| 53     | G      | 0.003333   | 0.004714      |
| 54     | U      | 0.023333   | 0.016997      |
| 55     | C      | 0.050000   | 0.016330      |
| 56     | U      | 0.133333   | 0.110252      |
| 57     | C      | 0.036667   | 0.051854      |
| 58     | U      | 0.000000   | 0.000000      |

**RK15**

| seqNum | seqRNA | Mean value | Standard dev. |
|--------|--------|------------|---------------|
| 16     | G      | 0.046667   | 0.065997      |
| 17     | A      | 0.070000   | 0.098995      |
| 18     | C      | 0.100000   | 0.077889      |
| 19     | U      | 0.110000   | 0.028284      |
| 20     | U      | 0.103333   | 0.075865      |
| 21     | G      | 0.080000   | 0.058878      |
| 22     | A      | 0.340000   | 0.096264      |
| 23     | U      | 0.710000   | 0.151217      |
| 24     | C      | 0.196667   | 0.089938      |
| 25     | A      | 0.070000   | 0.053541      |
| 26     | G      | 0.376667   | 0.067987      |
| 27     | A      | 0.890000   | 0.176824      |
| 28     | A      | 0.916667   | 0.108730      |
| 29     | C      | 0.113333   | 0.083799      |
| 30     | A      | 1.023333   | 0.207257      |
| 31     | C      | 0.216667   | 0.100775      |
| 32     | U      | 0.040000   | 0.014142      |
| 33     | G      | 0.120000   | 0.058878      |
| 34     | U      | 0.050000   | 0.070711      |
| 35     | C      | 0.180000   | 0.098995      |
| 36     | U      | 0.030000   | 0.024495      |
| 37     | U      | 0.103333   | 0.111455      |
| 38     | G      | 0.196667   | 0.038586      |
| 39     | U      | 0.150000   | 0.029439      |
| 40     | C      | 0.153333   | 0.032998      |
| 41     | U      | 0.060000   | 0.084853      |
| 42     | C      | 0.000000   | 0.000000      |
| 43     | C      | 0.016667   | 0.023570      |
| 44     | A      | 0.026667   | 0.037712      |
| 45     | U      | 0.190000   | 0.065320      |
| 46     | U      | 0.263333   | 0.155206      |
| 47     | U      | 0.173333   | 0.179134      |
| 48     | C      | 0.130000   | 0.090921      |
| 49     | U      | 0.096667   | 0.077603      |
| 50     | U      | 0.266667   | 0.038586      |
| 51     | G      | 0.116667   | 0.047140      |
| 52     | U      | 0.093333   | 0.028674      |
| 53     | G      | 0.113333   | 0.065997      |
| 54     | U      | 0.106667   | 0.123648      |
| 55     | C      | 0.113333   | 0.114407      |
| 56     | U      | 0.000000   | 0.000000      |
| 57     | C      | 0.043333   | 0.041899      |
| 58     | U      | 0.000000   | 0.000000      |
| 59     | U      | 0.020000   | 0.028284      |
| 60     | G      | 0.023333   | 0.026247      |
| 61     | U      | 0.163333   | 0.103387      |

|       |          |          |       |          |          |
|-------|----------|----------|-------|----------|----------|
| 59 U  | 0.143333 | 0.100775 | 62 U  | 1.116667 | 0.257207 |
| 60 G  | 0.243333 | 0.044969 | 63 C  | 0.183333 | 0.118134 |
| 61 U  | 0.156667 | 0.026247 | 64 C  | 0.073333 | 0.103709 |
| 62 U  | 1.750000 | 0.212289 | 65 C  | 0.000000 | 0.000000 |
| 63 C  | 0.036667 | 0.051854 | 66 U  | 0.216667 | 0.306413 |
| 64 C  | 0.000000 | 0.000000 | 67 U  | 0.113333 | 0.160278 |
| 65 C  | 0.000000 | 0.000000 | 68 C  | 0.000000 | 0.000000 |
| 66 U  | 0.000000 | 0.000000 | 69 A  | 0.000000 | 0.000000 |
| 67 U  | 1.813333 | 0.289636 | 70 A  | 0.223333 | 0.315841 |
| 68 C  | 4.540000 | 2.313367 | 71 U  | 0.203333 | 0.165395 |
| 69 A  | 0.723333 | 0.089938 | 72 U  | 0.116667 | 0.109646 |
| 70 A  | 0.963333 | 0.095685 | 73 C  | 0.016667 | 0.023570 |
| 71 U  | 0.153333 | 0.018856 | 74 C  | 0.000000 | 0.000000 |
| 72 U  | 0.040000 | 0.024495 | 75 C  | 0.000000 | 0.000000 |
| 73 C  | 0.006667 | 0.009428 | 76 A  | 0.000000 | 0.000000 |
| 74 C  | 0.000000 | 0.000000 | 77 C  | 0.073333 | 0.096724 |
| 75 C  | 0.053333 | 0.075425 | 78 U  | 0.190000 | 0.029439 |
| 76 A  | 0.170000 | 0.024495 | 79 C  | 0.100000 | 0.085245 |
| 77 C  | 0.093333 | 0.028674 | 80 C  | 0.153333 | 0.126579 |
| 78 U  | 0.096667 | 0.026247 | 81 C  | 0.120000 | 0.082865 |
| 79 C  | 0.033333 | 0.004714 | 82 U  | 0.120000 | 0.084853 |
| 80 C  | 0.006667 | 0.004714 | 83 C  | 0.220000 | 0.061644 |
| 81 C  | 0.020000 | 0.028284 | 84 C  | 0.166667 | 0.086538 |
| 82 U  | 0.013333 | 0.018856 | 85 U  | 0.000000 | 0.000000 |
| 83 C  | 0.050000 | 0.021602 | 86 C  | 0.000000 | 0.000000 |
| 84 C  | 0.056667 | 0.004714 | 87 C  | 0.000000 | 0.000000 |
| 85 U  | 0.013333 | 0.009428 | 88 A  | 0.000000 | 0.000000 |
| 86 C  | 0.000000 | 0.000000 | 89 G  | 0.493333 | 0.210132 |
| 87 C  | 0.000000 | 0.000000 | 90 G  | 0.803333 | 0.245266 |
| 88 A  | 0.130000 | 0.057155 | 91 U  | 1.226667 | 0.137194 |
| 89 G  | 0.786667 | 0.036818 | 92 U  | 1.496667 | 0.205480 |
| 90 G  | 0.733333 | 0.057349 | 93 C  | 0.470000 | 0.101980 |
| 91 U  | 1.450000 | 0.048990 | 94 C  | 0.023333 | 0.026247 |
| 92 U  | 1.506667 | 0.091043 | 95 U  | 0.000000 | 0.000000 |
| 93 C  | 0.103333 | 0.023570 | 96 A  | 0.080000 | 0.099331 |
| 94 C  | 0.000000 | 0.000000 | 97 C  | 0.210000 | 0.050990 |
| 95 U  | 0.000000 | 0.000000 | 98 U  | 1.643333 | 0.238933 |
| 96 A  | 0.003333 | 0.004714 | 99 G  | 0.370000 | 0.126754 |
| 97 C  | 0.183333 | 0.071336 | 100 U | 0.000000 | 0.000000 |
| 98 U  | 1.976667 | 0.093927 | 101 U | 0.176667 | 0.089938 |
| 99 G  | 0.153333 | 0.004714 | 102 G | 0.350000 | 0.032660 |
| 100 U | 0.013333 | 0.018856 | 103 A | 1.076667 | 0.234426 |
| 101 U | 0.436667 | 0.094281 | 104 U | 0.383333 | 0.020548 |
| 102 G | 0.366667 | 0.038586 | 105 C | 0.336667 | 0.032998 |
| 103 A | 0.556667 | 0.695621 | 106 C | 0.120000 | 0.057155 |
| 104 U | 0.913333 | 0.464567 | 107 C | 0.000000 | 0.000000 |
| 105 C | 0.160000 | 0.108012 | 108 G | 0.066667 | 0.060185 |
| 106 C | 0.010000 | 0.014142 | 109 C | 0.523333 | 0.084984 |

|       |          |          |       |          |          |
|-------|----------|----------|-------|----------|----------|
| 107 C | 0.000000 | 0.000000 | 110 G | 2.733333 | 0.073636 |
| 108 G | 0.123333 | 0.052493 | 111 G | 2.326667 | 0.200389 |
| 109 C | 0.623333 | 0.168193 | 112 G | 1.043333 | 0.016997 |
| 110 G | 2.926667 | 0.040277 | 113 U | 2.220000 | 0.021602 |
| 111 G | 1.573333 | 0.099778 | 114 C | 0.363333 | 0.033993 |
| 112 G | 0.533333 | 0.032998 | 115 G | 0.073333 | 0.065997 |
| 113 U | 1.936667 | 0.024944 | 116 G | 0.000000 | 0.000000 |
| 114 C | 0.040000 | 0.008165 | 117 G | 0.000000 | 0.000000 |
| 115 G | 0.000000 | 0.000000 | 118 A | 0.000000 | 0.000000 |
| 116 G | 0.000000 | 0.000000 | 119 C | 0.000000 | 0.000000 |
| 117 G | 0.000000 | 0.000000 | 120 A | 1.156667 | 0.132749 |
| 118 A | 0.006667 | 0.009428 | 121 G | 0.560000 | 0.071181 |
| 119 C | 0.260000 | 0.129615 | 122 U | 0.993333 | 0.053125 |
| 120 A | 1.286667 | 0.059067 | 123 U | 1.026667 | 0.080139 |
| 121 G | 0.170000 | 0.147648 | 124 G | 0.193333 | 0.028674 |
| 122 U | 0.426667 | 0.004714 | 125 G | 0.010000 | 0.014142 |
| 123 U | 0.726667 | 0.057927 | 126 C | 0.073333 | 0.036818 |
| 124 G | 0.030000 | 0.008165 | 127 G | 0.006667 | 0.009428 |
| 125 G | 0.026667 | 0.037712 | 128 C | 0.000000 | 0.000000 |
| 126 C | 0.056667 | 0.080139 | 129 C | 0.000000 | 0.000000 |
| 127 G | 0.016667 | 0.016997 | 130 C | 0.000000 | 0.000000 |
| 128 C | 0.000000 | 0.000000 | 131 A | 0.000000 | 0.000000 |
| 129 C | 0.000000 | 0.000000 | 132 A | 0.083333 | 0.062361 |
| 130 C | 0.066667 | 0.094281 | 133 C | 0.060000 | 0.021602 |
| 131 A | 0.030000 | 0.042426 | 134 G | 0.116667 | 0.098093 |
| 132 A | 0.290000 | 0.000000 | 135 U | 0.136667 | 0.061824 |
| 133 C | 0.056667 | 0.004714 | 136 G | 0.033333 | 0.020548 |
| 134 G | 0.013333 | 0.009428 | 137 G | 0.000000 | 0.000000 |
| 135 U | 0.023333 | 0.016997 | 138 G | 0.000000 | 0.000000 |
| 136 G | 0.016667 | 0.012472 | 139 G | 0.000000 | 0.000000 |
| 137 G | 0.000000 | 0.000000 | 140 C | 0.000000 | 0.000000 |
| 138 G | 0.000000 | 0.000000 | 141 U | 0.000000 | 0.000000 |
| 139 G | 0.036667 | 0.028674 | 142 G | 0.063333 | 0.054365 |
| 140 C | 0.000000 | 0.000000 | 143 G | 0.000000 | 0.000000 |
| 141 U | 0.003333 | 0.004714 | 144 A | 0.000000 | 0.000000 |
| 142 G | 0.016667 | 0.016997 | 145 U | 0.206667 | 0.126579 |
| 143 G | 0.000000 | 0.000000 | 146 A | 0.673333 | 0.479537 |
| 144 A | 0.050000 | 0.063770 | 147 C | 0.160000 | 0.126754 |
| 145 U | 0.416667 | 0.040277 | 148 G | nd       | nd       |
| 146 A | 1.040000 | 0.131403 | 149 A | nd       | nd       |
| 147 C | 0.296667 | 0.073182 | 150 G | nd       | nd       |
| 148 G | 0.000000 | 0.000000 | 151 G | nd       | nd       |
| 149 A | nd       | nd       | 152 G | nd       | nd       |
| 150 G | nd       | nd       | 153 A | nd       | nd       |
| 151 G | nd       | nd       | 154 A | nd       | nd       |
| 152 G | nd       | nd       | 155 U | 0.070000 | 0.092014 |
| 153 A | nd       | nd       | 156 U | 0.960000 | 0.176824 |
| 154 A | 1.453333 | 0.107806 | 157 U | 1.086667 | 0.398358 |

|       |          |          |       |          |          |
|-------|----------|----------|-------|----------|----------|
| 155 U | 1.873333 | 0.143836 | 158 C | 0.106667 | 0.117284 |
| 156 U | 1.236667 | 0.220656 | 159 G | 0.053333 | 0.037712 |
| 157 U | 1.566667 | 0.247162 | 160 U | 0.116667 | 0.118977 |
| 158 C | 0.036667 | 0.012472 | 161 G | 0.240000 | 0.144453 |
| 159 G | 0.013333 | 0.018856 | 162 A | 1.670000 | 0.235514 |
| 160 U | 0.133333 | 0.038586 | 163 G | 0.113333 | 0.108730 |
| 161 G | 0.220000 | 0.000000 | 164 G | 0.046667 | 0.041096 |
| 162 A | 2.020000 | 0.393700 | 165 A | 0.166667 | 0.143372 |
| 163 G | 0.046667 | 0.026247 | 166 A | 0.373333 | 0.091043 |
| 164 G | 0.000000 | 0.000000 | 167 G | 0.176667 | 0.122565 |
| 165 A | 0.000000 | 0.000000 | 168 A | 0.356667 | 0.046428 |
| 166 A | 0.230000 | 0.021602 | 169 C | 0.036667 | 0.051854 |
| 167 G | 0.160000 | 0.021602 | 170 G | 0.073333 | 0.044969 |
| 168 A | 0.546667 | 0.078457 | 171 A | 0.070000 | 0.049666 |
| 169 C | 0.133333 | 0.148174 | 172 C | 0.236667 | 0.033993 |
| 170 G | 0.046667 | 0.033993 | 173 G | 0.203333 | 0.053125 |
| 171 A | 0.126667 | 0.145220 | 174 C | 0.013333 | 0.018856 |
| 172 C | 0.016667 | 0.023570 | 175 G | 0.016667 | 0.023570 |
| 173 G | 0.013333 | 0.009428 | 176 U | 0.000000 | 0.000000 |
| 174 C | 0.033333 | 0.016997 | 177 U | 0.230000 | 0.115181 |
| 175 G | 0.123333 | 0.066500 | 178 C | 0.210000 | 0.211818 |
| 176 U | 0.036667 | 0.044969 | 179 G | 0.180000 | 0.077889 |
| 177 U | 0.103333 | 0.125521 | 180 C | 0.120000 | 0.169706 |
| 178 C | 0.026667 | 0.024944 | 181 C | 0.216667 | 0.271334 |
| 179 G | 0.046667 | 0.065997 | 182 G | 0.503333 | 0.358732 |
| 180 C | 0.020000 | 0.016330 | 183 G | 0.746667 | 0.569054 |
| 181 C | 0.006667 | 0.009428 | 184 C | 0.466667 | 0.452941 |
| 182 G | 0.280000 | 0.078740 | 185 C | 0.166667 | 0.214838 |
| 183 G | 0.443333 | 0.351410 | 186 G | 0.086667 | 0.061824 |
| 184 C | 0.140000 | 0.197990 | 187 G | nd       | nd       |
| 185 C | 0.173333 | 0.131993 | 188 C | nd       | nd       |
| 186 G | 0.056667 | 0.080139 | 189 G | nd       | nd       |
| 187 G | 0.216667 | 0.306413 | 190 A | 0.150000 | 0.212132 |
| 188 C | 0.140000 | 0.197990 | 191 U | 0.100000 | 0.072572 |
| 189 G | 0.140000 | 0.197990 | 192 U | 0.380000 | 0.278568 |
| 190 A | 0.103333 | 0.146135 | 193 A | 0.380000 | 0.077889 |
| 191 U | 0.486667 | 0.127105 | 194 A | 0.353333 | 0.030912 |
| 192 U | 2.116667 | 0.278608 | 195 A | 0.340000 | 0.071181 |
| 193 A | 0.493333 | 0.114698 | 196 A | 0.273333 | 0.020548 |
| 194 A | 0.170000 | 0.057155 | 197 G | 0.143333 | 0.107806 |
| 195 A | 0.066667 | 0.080554 | 198 U | 0.166667 | 0.046428 |
| 196 A | 0.056667 | 0.040277 | 199 G | 0.346667 | 0.012472 |
| 197 G | 0.316667 | 0.077172 | 200 A | 0.513333 | 0.024944 |
| 198 U | 0.453333 | 0.109646 | 201 A | 0.586667 | 0.030912 |
| 199 G | 0.626667 | 0.036818 | 202 A | 0.370000 | 0.050990 |
| 200 A | 0.606667 | 0.069442 | 203 G | 0.336667 | 0.041899 |
| 201 A | 0.613333 | 0.153695 | 204 U | 0.243333 | 0.240046 |
| 202 A | 0.786667 | 0.121198 | 205 A | 0.396667 | 0.087305 |

|       |          |          |       |          |          |
|-------|----------|----------|-------|----------|----------|
| 203 G | 1.416667 | 0.009428 | 206 A | 0.546667 | 0.054365 |
| 204 U | 4.113333 | 0.171335 | 207 A | 0.310000 | 0.042426 |
| 205 A | 1.423333 | 0.040277 | 208 C | 0.136667 | 0.118977 |
| 206 A | 1.110000 | 0.058878 | 209 U | 0.020000 | 0.016330 |
| 207 A | 0.323333 | 0.046428 | 210 C | 0.000000 | 0.000000 |
| 208 C | 0.103333 | 0.103709 | 211 U | 0.036667 | 0.051854 |
| 209 U | 0.020000 | 0.021602 | 212 C | 0.226667 | 0.131993 |
| 210 C | 0.050000 | 0.029439 | 213 G | 0.126667 | 0.016997 |
| 211 U | 0.026667 | 0.020548 | 214 A | 0.336667 | 0.023570 |
| 212 C | 0.120000 | 0.016330 | 215 A | 0.396667 | 0.040277 |
| 213 U | 0.013333 | 0.018856 | 216 A | 0.236667 | 0.012472 |
| 214 U | 0.316667 | 0.046428 | 217 G | 0.130000 | 0.078740 |
| 215 G | 0.286667 | 0.044969 | 218 U | 0.026667 | 0.037712 |
| 216 G | 0.030000 | 0.024495 | 219 A | 0.446667 | 0.171335 |
| 217 C | 0.010000 | 0.008165 | 220 A | 0.496667 | 0.061824 |
| 218 C | 0.013333 | 0.012472 | 221 G | 0.593333 | 0.047842 |
| 219 G | 0.016667 | 0.016997 | 222 U | 0.603333 | 0.145220 |
| 220 C | 0.046667 | 0.065997 | 223 G | 0.470000 | 0.057155 |
| 221 C | 0.033333 | 0.033993 | 224 U | 0.623333 | 0.075865 |
| 222 G | 0.056667 | 0.051854 | 225 U | 0.596667 | 0.036818 |
| 223 C | 0.030000 | 0.042426 | 226 G | 0.050000 | 0.070711 |
| 224 G | 0.000000 | 0.000000 | 227 C | 0.000000 | 0.000000 |
| 225 G | 0.120000 | 0.097980 | 228 G | 0.186667 | 0.030912 |
| 226 G | 0.710000 | 0.273130 | 229 C | 0.000000 | 0.000000 |
| 227 A | 2.033333 | 0.360031 | 230 U | 0.016667 | 0.023570 |
| 228 A | 1.523333 | 0.203361 | 231 C | 0.066667 | 0.094281 |
| 229 C | 0.506667 | 0.144299 | 232 G | 0.523333 | 0.094281 |
| 230 C | 0.380000 | 0.310269 | 233 G | 0.506667 | 0.151511 |
| 231 U | 1.473333 | 0.471334 | 234 A | 1.213333 | 0.061283 |
| 232 G | 1.056667 | 0.200721 | 235 U | 1.160000 | 0.627853 |
| 233 C | 0.236667 | 0.111455 | 236 A | 0.670000 | 0.268701 |
| 234 C | 0.040000 | 0.049666 | 237 U | 0.716667 | 0.131993 |
| 235 G | 0.000000 | 0.000000 | 238 G | 0.023333 | 0.016997 |
| 236 C | 0.013333 | 0.018856 | 239 G | 0.006667 | 0.009428 |
| 237 G | 0.026667 | 0.024944 | 240 G | 0.000000 | 0.000000 |
| 238 U | 0.043333 | 0.024944 | 241 G | 0.000000 | 0.000000 |
| 239 U | 0.156667 | 0.020548 | 242 C | 0.000000 | 0.000000 |
| 240 G | 0.156667 | 0.018856 | 243 A | 0.000000 | 0.000000 |
| 241 G | 0.356667 | 0.024944 | 244 A | 0.073333 | 0.018856 |
| 242 A | 1.973333 | 0.024944 | 245 G | 0.266667 | 0.037712 |
| 243 C | 0.310000 | 0.072572 | 246 A | 0.870000 | 0.107083 |
| 244 C | 0.080000 | 0.074833 | 247 A | 0.753333 | 0.086538 |
| 245 U | 0.063333 | 0.044969 | 248 U | 0.980000 | 0.131403 |
| 246 G | 0.060000 | 0.037417 | 249 U | 0.466667 | 0.083799 |
| 247 A | 0.133333 | 0.061283 | 250 A | 0.100000 | 0.035590 |
| 248 A | 0.066667 | 0.020548 | 251 A | 0.056667 | 0.028674 |
| 249 A | 0.036667 | 0.044969 | 252 G | 0.020000 | 0.008165 |
| 250 G | 0.110000 | 0.121929 | 253 C | 0.196667 | 0.163367 |

|       |          |          |       |          |          |
|-------|----------|----------|-------|----------|----------|
| 251 U | 1.123333 | 0.347403 | 254 C | 0.126667 | 0.078457 |
| 252 A | 0.606667 | 0.162138 | 255 A | 0.276667 | 0.082597 |
| 253 A | 0.563333 | 0.136707 | 256 G | 0.130000 | 0.092014 |
| 254 G | 0.653333 | 0.121198 | 257 C | 0.046667 | 0.065997 |
| 255 U | 1.043333 | 0.140791 | 258 A | 0.526667 | 0.143836 |
| 256 G | 0.520000 | 0.021602 | 259 U | 0.960000 | 0.021602 |
| 257 U | 0.826667 | 0.113235 | 260 G | 0.823333 | 0.108730 |
| 258 U | 0.460000 | 0.043205 | 261 A | 0.610000 | 0.163095 |
| 259 G | 0.040000 | 0.049666 | 262 A | 0.486667 | 0.098432 |
| 260 C | 0.060000 | 0.035590 | 263 C | 0.420000 | 0.092014 |
| 261 G | 0.123333 | 0.032998 | 264 G | 0.280000 | 0.053541 |
| 262 C | 0.036667 | 0.028674 | 265 U | 0.433333 | 0.009428 |
| 263 U | 0.140000 | 0.024495 | 266 U | 0.606667 | 0.196186 |
| 264 C | 0.510000 | 0.206074 | 267 A | 1.943333 | 0.106249 |
| 265 G | 0.526667 | 0.174420 | 268 U | 0.810000 | 0.042426 |
| 266 G | 0.456667 | 0.124989 | 269 G | 1.943333 | 0.087305 |
| 267 A | 1.656667 | 0.218530 | 270 U | 1.936667 | 0.125521 |
| 268 U | 2.656667 | 0.092856 | 271 A | 3.033333 | 0.134743 |
| 269 A | 0.893333 | 0.118977 | 272 G | 1.716667 | 0.453823 |
| 270 U | 0.810000 | 0.085245 | 273 A | 0.660000 | 0.216487 |
| 271 G | 0.050000 | 0.029439 | 274 A | 0.126667 | 0.089938 |
| 272 G | 0.000000 | 0.000000 | 275 C | 0.330000 | 0.265456 |
| 273 G | 0.000000 | 0.000000 | 276 A | 0.796667 | 0.143372 |
| 274 G | 0.000000 | 0.000000 | 277 A | 0.626667 | 0.040277 |
| 275 C | 0.110000 | 0.021602 | 278 U | 0.866667 | 0.061283 |
| 276 A | 0.000000 | 0.000000 | 279 U | 1.023333 | 0.080139 |
| 277 A | 0.063333 | 0.024944 | 280 G | 0.940000 | 0.120277 |
| 278 G | 0.073333 | 0.033993 | 281 A | 0.910000 | 0.050990 |
| 279 A | 0.430000 | 0.057155 | 282 A | 0.736667 | 0.186607 |
| 280 A | 0.373333 | 0.028674 | 283 G | 0.276667 | 0.384216 |
| 281 U | 0.616667 | 0.046428 | 284 C | 0.120000 | 0.129615 |
| 282 U | 0.436667 | 0.037712 | 285 A | 0.146667 | 0.085765 |
| 283 A | 0.070000 | 0.029439 | 286 G | 0.103333 | 0.112645 |
| 284 A | 0.023333 | 0.020548 | 287 G | 0.000000 | 0.000000 |
| 285 G | 0.006667 | 0.004714 | 288 C | 0.000000 | 0.000000 |
| 286 C | 0.026667 | 0.024944 | 289 U | 0.026667 | 0.030912 |
| 287 C | 0.040000 | 0.032660 | 290 U | 0.386667 | 0.273537 |
| 288 A | 0.106667 | 0.020548 | 291 U | 0.346667 | 0.249978 |
| 289 G | 0.140000 | 0.064807 | 292 A | 1.513333 | 0.214838 |
| 290 C | 0.306667 | 0.110855 | 293 A | 1.420000 | 0.305068 |
| 291 A | 0.223333 | 0.070396 | 294 A | 1.063333 | 0.165395 |
| 292 U | 0.243333 | 0.077603 | 295 G | 0.136667 | 0.033993 |
| 293 G | 0.383333 | 0.054365 | 296 A | 0.000000 | 0.000000 |
| 294 A | 0.280000 | 0.037417 | 297 C | 0.000000 | 0.000000 |
| 295 A | 0.233333 | 0.030912 | 298 A | 0.000000 | 0.000000 |
| 296 C | 0.216667 | 0.020548 | 299 C | 0.033333 | 0.012472 |
| 297 G | 0.086667 | 0.032998 | 300 G | 0.070000 | 0.045461 |
| 298 U | 0.263333 | 0.004714 | 301 G | 0.053333 | 0.040277 |

|       |          |          |       |          |          |
|-------|----------|----------|-------|----------|----------|
| 299 U | 0.593333 | 0.068475 | 302 G | 0.000000 | 0.000000 |
| 300 A | 1.180000 | 0.096264 | 303 G | 0.136667 | 0.097411 |
| 301 U | 0.503333 | 0.087305 | 304 A | 0.113333 | 0.086538 |
| 302 G | 1.256667 | 0.130213 | 305 G | 0.200000 | 0.086410 |
| 303 U | 1.476667 | 0.059067 | 306 U | 0.460000 | 0.353648 |
| 304 A | 1.970000 | 0.157692 | 307 A | 0.530000 | 0.070711 |
| 305 G | 0.893333 | 0.044969 | 308 A | 0.316667 | 0.009428 |
| 306 A | 0.456667 | 0.106562 | 309 A | 0.523333 | 0.041096 |
| 307 A | 0.373333 | 0.151070 | 310 G | 0.323333 | 0.033993 |
| 308 C | 1.676667 | 0.307065 | 311 G | 0.313333 | 0.038586 |
| 309 A | 0.496667 | 0.087305 | 312 U | 0.486667 | 0.190146 |
| 310 A | 0.260000 | 0.021602 | 313 U | 0.760000 | 0.569269 |
| 311 U | 0.423333 | 0.028674 | 314 A | 1.283333 | 0.063421 |
| 312 U | 0.556667 | 0.069442 | 315 A | 0.770000 | 0.074833 |
| 313 G | 0.446667 | 0.077603 | 316 A | 0.683333 | 0.081786 |
| 314 A | 0.496667 | 0.081786 | 317 U | 0.353333 | 0.256298 |
| 315 A | 0.306667 | 0.026247 | 318 A | 0.646667 | 0.121198 |
| 316 G | 0.000000 | 0.000000 | 319 U | 0.773333 | 0.160069 |
| 317 C | 0.370000 | 0.028284 | 320 G | 1.293333 | 0.315841 |
| 318 A | 0.016667 | 0.012472 | 321 C | 0.006667 | 0.009428 |
| 319 G | 0.000000 | 0.000000 | 322 U | 0.090000 | 0.073485 |
| 320 G | 0.000000 | 0.000000 | 323 G | 0.463333 | 0.134247 |
| 321 C | 0.000000 | 0.000000 | 324 A | 0.373333 | 0.049889 |
| 322 U | 0.033333 | 0.033993 | 325 U | 0.060000 | 0.056569 |
| 323 U | 0.393333 | 0.095336 | 326 C | 0.000000 | 0.000000 |
| 324 U | 1.173333 | 0.162138 | 327 U | 0.096667 | 0.086538 |
| 325 A | 1.400000 | 0.243447 | 328 U | 0.380000 | 0.080416 |
| 326 A | 1.253333 | 0.155849 | 329 U | 0.563333 | 0.024944 |
| 327 A | 0.786667 | 0.143372 | 330 U | 0.673333 | 0.122837 |
| 328 G | 0.100000 | 0.021602 | 331 G | 0.536667 | 0.304448 |
| 329 A | 0.070000 | 0.037417 | 332 A | 0.593333 | 0.214838 |
| 330 C | 0.213333 | 0.033993 | 333 A | 0.323333 | 0.209497 |
| 331 A | 0.000000 | 0.000000 | 334 A | 0.050000 | 0.057155 |
| 332 C | 0.023333 | 0.018856 | 335 U | 0.120000 | 0.086410 |
| 333 G | 0.023333 | 0.004714 | 336 U | 0.343333 | 0.309444 |
| 334 G | 0.006667 | 0.009428 | 337 U | 0.673333 | 0.040277 |
| 335 G | 0.006667 | 0.009428 | 338 U | 0.970000 | 0.107083 |
| 336 G | 0.126667 | 0.009428 | 339 U | 0.766667 | 0.041899 |
| 337 A | 0.053333 | 0.018856 | 340 U | 1.026667 | 0.175563 |
| 338 G | 0.160000 | 0.016330 | 341 G | 0.493333 | 0.097411 |
| 339 U | 0.706667 | 0.140554 | 342 A | 0.430000 | 0.106145 |
| 340 A | 0.223333 | 0.038586 | 343 U | 0.380000 | 0.035590 |
| 341 A | 0.153333 | 0.024944 | 344 U | 0.186667 | 0.057927 |
| 342 A | 0.130000 | 0.043205 | 345 U | 0.346667 | 0.047842 |
| 343 G | 0.003333 | 0.004714 | 346 U | 0.453333 | 0.054365 |
| 344 G | 0.006667 | 0.009428 | 347 G | 0.230000 | 0.072572 |
| 345 U | 0.226667 | 0.033993 | 348 U | 0.336667 | 0.112645 |
| 346 U | 1.013333 | 0.077603 | 349 G | 0.360000 | 0.042426 |

|       |          |          |       |          |          |
|-------|----------|----------|-------|----------|----------|
| 347 A | 0.716667 | 0.012472 | 350 A | 0.320000 | 0.058878 |
| 348 A | 0.380000 | 0.021602 | 351 A | 0.240000 | 0.043205 |
| 349 A | 0.340000 | 0.014142 | 352 G | 0.126667 | 0.032998 |
| 350 U | 0.546667 | 0.047842 | 353 G | 0.480000 | 0.149889 |
| 351 A | 0.203333 | 0.004714 | 354 A | 0.206667 | 0.264491 |
| 352 U | 0.296667 | 0.012472 | 355 U | 0.000000 | 0.000000 |
| 353 G | 0.486667 | 0.065997 | 356 A | 2.490000 | 0.227303 |
| 354 C | 0.060000 | 0.053541 | 357 C | 0.223333 | 0.288020 |
| 355 U | 0.000000 | 0.000000 | 358 U | 1.360000 | 0.147648 |
| 356 G | 0.143333 | 0.009428 | 359 U | 1.730000 | 0.072572 |
| 357 A | 0.133333 | 0.032998 | 360 G | 0.233333 | 0.114407 |
| 358 U | 0.053333 | 0.026247 | 361 U | 0.006667 | 0.009428 |
| 359 C | 0.000000 | 0.000000 | 362 C | 0.000000 | 0.000000 |
| 360 U | 0.000000 | 0.000000 | 363 C | 0.000000 | 0.000000 |
| 361 U | 0.073333 | 0.023570 | 364 U | 0.000000 | 0.000000 |
| 362 U | 0.170000 | 0.024495 | 365 U | 0.146667 | 0.106562 |
| 363 U | 0.080000 | 0.069761 | 366 G | 0.010000 | 0.008165 |
| 364 G | 0.000000 | 0.000000 | 367 G | 0.090000 | 0.042426 |
| 365 A | 0.233333 | 0.057927 | 368 U | 0.000000 | 0.000000 |
| 366 A | 0.003333 | 0.004714 | 369 U | 0.180000 | 0.148997 |
| 367 A | 0.000000 | 0.000000 | 370 U | 0.023333 | 0.032998 |
| 368 U | 0.000000 | 0.000000 | 371 C | 0.013333 | 0.018856 |
| 369 U | 0.000000 | 0.000000 | 372 C | 0.360000 | 0.254689 |
| 370 U | 0.056667 | 0.040277 | 373 G | 0.216667 | 0.258500 |
| 371 U | 0.240000 | 0.096264 | 374 C | 1.803333 | 1.276253 |
| 372 U | 0.176667 | 0.084984 | 375 A | 5.186667 | 0.699349 |
| 373 U | 0.370000 | 0.071181 | 376 A | 2.666667 | 0.089567 |
| 374 G | 0.166667 | 0.041096 | 377 G | 2.550000 | 0.179072 |
| 375 A | 0.246667 | 0.016997 | 378 A | 2.930000 | 0.410447 |
| 376 U | 0.210000 | 0.021602 | 379 G | 0.150000 | 0.118603 |
| 377 U | 0.116667 | 0.016997 | 380 G | 0.000000 | 0.000000 |
| 378 U | 0.170000 | 0.021602 | 381 G | 0.003333 | 0.004714 |
| 379 U | 0.210000 | 0.008165 | 382 A | 0.020000 | 0.028284 |
| 380 G | 0.073333 | 0.032998 | 383 A | 0.013333 | 0.018856 |
| 381 U | 0.236667 | 0.020548 | 384 C | 0.000000 | 0.000000 |
| 382 G | 0.130000 | 0.000000 | 385 C | 0.000000 | 0.000000 |
| 383 A | 0.103333 | 0.004714 | 386 A | 0.000000 | 0.000000 |
| 384 A | 0.093333 | 0.059067 | 387 U | 0.000000 | 0.000000 |
| 385 G | 0.133333 | 0.074087 | 388 A | 0.560000 | 0.127541 |
| 386 G | 0.413333 | 0.066500 | 389 G | 0.063333 | 0.057927 |
| 387 A | 0.833333 | 0.175563 | 390 A | 0.000000 | 0.000000 |
| 388 U | 1.040000 | 0.101980 | 391 U | 0.000000 | 0.000000 |
| 389 A | 1.300000 | 0.092014 | 392 A | 0.970000 | 0.269815 |
| 390 C | 0.240000 | 0.152534 | 393 U | 0.656667 | 0.409986 |
| 391 U | 0.603333 | 0.131233 | 394 U | 0.000000 | 0.000000 |
| 392 U | 0.783333 | 0.143836 | 395 A | 0.376667 | 0.221560 |
| 393 G | 0.083333 | 0.062361 | 396 A | 0.250000 | 0.155134 |
| 394 U | 0.093333 | 0.023570 | 397 A | 0.550000 | 0.024495 |



|       |          |          |       |          |          |
|-------|----------|----------|-------|----------|----------|
| 395 C | 0.053333 | 0.018856 | 398 C | 0.270000 | 0.108012 |
| 396 C | 0.000000 | 0.000000 | 399 G | 0.000000 | 0.000000 |
| 397 U | 0.000000 | 0.000000 | 400 G | 0.000000 | 0.000000 |
| 398 U | 0.000000 | 0.000000 | 401 U | 0.683333 | 0.062361 |
| 399 G | 0.000000 | 0.000000 | 402 G | 0.286667 | 0.187853 |
| 400 G | 0.000000 | 0.000000 | 403 G | 0.000000 | 0.000000 |
| 401 U | 0.000000 | 0.000000 | 404 C | 0.023333 | 0.032998 |
| 402 U | 0.006667 | 0.009428 | 405 G | 0.840000 | 0.625620 |
| 403 U | 0.023333 | 0.032998 | 406 U | 0.843333 | 0.666650 |
| 404 C | 0.113333 | 0.086538 | 407 A | 1.813333 | 0.277649 |
| 405 C | 0.700000 | 0.078740 | 408 G | 2.383333 | 0.197034 |
| 406 G | 2.403333 | 0.223954 |       |          |          |
| 407 C | 5.713333 | 0.254864 |       |          |          |
| 408 A | 4.060000 | 0.486415 |       |          |          |
| 409 A | 1.536667 | 0.308257 |       |          |          |
| 410 G | 0.946667 | 0.245130 |       |          |          |
| 411 A | 0.950000 | 0.088318 |       |          |          |
| 412 G | 0.000000 | 0.000000 |       |          |          |
| 413 G | 0.003333 | 0.004714 |       |          |          |
| 414 G | 0.000000 | 0.000000 |       |          |          |
| 415 A | 0.010000 | 0.014142 |       |          |          |
| 416 A | 0.023333 | 0.020548 |       |          |          |
| 417 C | 0.026667 | 0.037712 |       |          |          |
| 418 C | 0.000000 | 0.000000 |       |          |          |
| 419 A | 0.236667 | 0.148847 |       |          |          |
| 420 U | 0.496667 | 0.122293 |       |          |          |
| 421 A | 0.163333 | 0.012472 |       |          |          |
| 422 G | 0.000000 | 0.000000 |       |          |          |
| 423 A | 0.386667 | 0.154560 |       |          |          |
| 424 U | 1.103333 | 0.124722 |       |          |          |
| 425 A | 0.910000 | 0.247790 |       |          |          |
| 426 U | 1.096667 | 0.285463 |       |          |          |
| 427 U | 1.733333 | 0.151950 |       |          |          |
| 428 A | 0.720000 | 0.228619 |       |          |          |
| 429 A | 0.270000 | 0.071181 |       |          |          |
| 430 A | 0.270000 | 0.064807 |       |          |          |
| 431 C | 0.260000 | 0.053541 |       |          |          |
| 432 G | 0.003333 | 0.004714 |       |          |          |
| 433 G | 0.006667 | 0.004714 |       |          |          |
| 434 U | 0.336667 | 0.036818 |       |          |          |
| 435 G | 0.103333 | 0.028674 |       |          |          |
| 436 G | 0.053333 | 0.018856 |       |          |          |
| 437 C | 0.580000 | 0.099331 |       |          |          |
| 438 G | 1.213333 | 0.094281 |       |          |          |
| 439 U | 1.840000 | 0.148997 |       |          |          |
| 440 A | 1.003333 | 0.079303 |       |          |          |
| 441 G | 1.816667 | 0.442895 |       |          |          |

**RK16**

| seqNum | seqRNA | Mean value | Standard dev. |
|--------|--------|------------|---------------|
| 11     | A      | 0.590000   | 0.000000      |
| 12     | A      | 0.500000   | 0.000000      |
| 13     | U      | 0.473333   | 0.163367      |
| 14     | G      | 0.370000   | 0.074833      |
| 15     | A      | 0.500000   | 0.425519      |
| 16     | G      | 0.133333   | 0.167796      |
| 17     | A      | 0.046667   | 0.052493      |
| 18     | C      | 0.223333   | 0.294882      |
| 19     | U      | 0.143333   | 0.149741      |
| 20     | U      | 0.146667   | 0.012472      |
| 21     | G      | 0.373333   | 0.167398      |
| 22     | A      | 1.200000   | 0.237206      |
| 23     | U      | 2.340000   | 0.629656      |
| 24     | C      | 0.380000   | 0.171464      |
| 25     | A      | 0.120000   | 0.129615      |
| 26     | G      | 0.580000   | 0.155778      |
| 27     | A      | 2.166667   | 0.338264      |
| 28     | A      | 3.073333   | 0.504799      |
| 29     | C      | 1.090000   | 0.326905      |
| 30     | A      | 2.613333   | 0.700587      |
| 31     | C      | 0.416667   | 0.208540      |
| 32     | U      | 0.203333   | 0.146363      |
| 33     | G      | 0.080000   | 0.065320      |
| 34     | U      | 0.056667   | 0.080139      |
| 35     | C      | 0.146667   | 0.207418      |
| 36     | U      | 0.086667   | 0.122565      |
| 37     | U      | 0.190000   | 0.042426      |
| 38     | G      | 0.400000   | 0.133666      |
| 39     | U      | 0.110000   | 0.089815      |
| 40     | C      | 0.083333   | 0.117851      |
| 41     | U      | 0.000000   | 0.000000      |
| 42     | C      | 0.353333   | 0.278248      |
| 43     | C      | 0.096667   | 0.136707      |
| 44     | A      | 0.210000   | 0.155134      |
| 45     | U      | 0.746667   | 0.051854      |
| 46     | U      | 0.890000   | 0.092014      |
| 47     | U      | 0.733333   | 0.106249      |
| 48     | C      | 0.080000   | 0.014142      |
| 49     | U      | 0.416667   | 0.097411      |
| 50     | U      | 0.806667   | 0.231709      |
| 51     | G      | 0.106667   | 0.094281      |
| 52     | U      | 0.186667   | 0.105304      |
| 53     | G      | 0.013333   | 0.018856      |
| 54     | U      | 0.076667   | 0.051854      |
| 55     | C      | 0.016667   | 0.023570      |
| 56     | U      | 0.000000   | 0.000000      |

**RK17**

| seqNum | seqRNA | Mean value | Standard dev. |
|--------|--------|------------|---------------|
| 10     | A      | 1.063333   | 0.174611      |
| 11     | A      | 0.750000   | 0.189912      |
| 12     | A      | 1.076667   | 0.051854      |
| 13     | U      | 0.963333   | 0.224846      |
| 14     | G      | 0.070000   | 0.037417      |
| 15     | A      | 0.006667   | 0.009428      |
| 16     | G      | 0.173333   | 0.078457      |
| 17     | A      | 0.146667   | 0.069442      |
| 18     | C      | 0.213333   | 0.033993      |
| 19     | U      | 0.166667   | 0.065490      |
| 20     | U      | 0.306667   | 0.041899      |
| 21     | G      | 0.186667   | 0.066500      |
| 22     | A      | 1.083333   | 0.097411      |
| 23     | U      | 2.390000   | 0.591101      |
| 24     | C      | 0.230000   | 0.086410      |
| 25     | A      | 0.273333   | 0.174611      |
| 26     | G      | 0.786667   | 0.091773      |
| 27     | A      | 2.210000   | 0.261661      |
| 28     | A      | 2.803333   | 0.314784      |
| 29     | C      | 1.140000   | 0.440984      |
| 30     | A      | 2.770000   | 0.393022      |
| 31     | C      | 0.360000   | 0.092014      |
| 32     | U      | 0.163333   | 0.067987      |
| 33     | G      | 0.056667   | 0.080139      |
| 34     | U      | 0.000000   | 0.000000      |
| 35     | C      | 0.083333   | 0.069442      |
| 36     | U      | 0.000000   | 0.000000      |
| 37     | U      | 0.083333   | 0.044969      |
| 38     | G      | 0.206667   | 0.087305      |
| 39     | U      | 0.000000   | 0.000000      |
| 40     | C      | 0.093333   | 0.040277      |
| 41     | U      | 0.040000   | 0.056569      |
| 42     | C      | 0.836667   | 0.356495      |
| 43     | C      | 0.380000   | 0.283314      |
| 44     | A      | 0.513333   | 0.273537      |
| 45     | U      | 0.730000   | 0.155778      |
| 46     | U      | 0.486667   | 0.111455      |
| 47     | U      | 0.406667   | 0.054365      |
| 48     | C      | 0.146667   | 0.016997      |
| 49     | U      | 0.263333   | 0.026247      |
| 50     | U      | 0.453333   | 0.128149      |
| 51     | G      | 0.060000   | 0.014142      |
| 52     | U      | 0.056667   | 0.012472      |
| 53     | G      | 0.000000   | 0.000000      |
| 54     | U      | 0.000000   | 0.000000      |
| 55     | C      | 0.016667   | 0.023570      |

|       |          |          |       |          |          |
|-------|----------|----------|-------|----------|----------|
| 57 C  | 0.000000 | 0.000000 | 56 U  | 0.013333 | 0.018856 |
| 58 U  | 0.000000 | 0.000000 | 57 C  | 0.000000 | 0.000000 |
| 59 U  | 0.026667 | 0.037712 | 58 U  | 0.000000 | 0.000000 |
| 60 G  | 0.303333 | 0.074087 | 59 U  | 0.046667 | 0.036818 |
| 61 U  | 0.210000 | 0.037417 | 60 G  | 0.233333 | 0.137679 |
| 62 U  | 1.830000 | 0.184932 | 61 U  | 0.153333 | 0.118977 |
| 63 C  | 0.000000 | 0.000000 | 62 U  | 2.410000 | 0.374789 |
| 64 C  | 0.000000 | 0.000000 | 63 C  | 0.000000 | 0.000000 |
| 65 C  | 0.000000 | 0.000000 | 64 C  | 0.000000 | 0.000000 |
| 66 U  | 0.000000 | 0.000000 | 65 C  | 0.000000 | 0.000000 |
| 67 U  | 0.000000 | 0.000000 | 66 U  | 0.000000 | 0.000000 |
| 68 C  | 0.413333 | 0.584542 | 67 U  | 0.000000 | 0.000000 |
| 69 A  | 0.000000 | 0.000000 | 68 C  | 0.000000 | 0.000000 |
| 70 A  | 0.336667 | 0.455070 | 69 A  | 0.000000 | 0.000000 |
| 71 U  | 0.060000 | 0.084853 | 70 A  | 0.436667 | 0.355184 |
| 72 U  | 0.186667 | 0.038586 | 71 U  | 0.000000 | 0.000000 |
| 73 C  | 0.046667 | 0.041096 | 72 U  | 0.000000 | 0.000000 |
| 74 C  | 0.000000 | 0.000000 | 73 C  | 0.070000 | 0.028284 |
| 75 C  | 0.000000 | 0.000000 | 74 C  | 0.003333 | 0.004714 |
| 76 A  | 0.213333 | 0.074087 | 75 C  | 0.000000 | 0.000000 |
| 77 C  | 0.180000 | 0.131403 | 76 A  | 0.216667 | 0.041096 |
| 78 U  | 0.140000 | 0.043205 | 77 C  | 0.173333 | 0.024944 |
| 79 C  | 0.083333 | 0.110855 | 78 U  | 0.173333 | 0.046428 |
| 80 C  | 0.020000 | 0.014142 | 79 C  | 0.070000 | 0.032660 |
| 81 C  | 0.020000 | 0.028284 | 80 C  | 0.046667 | 0.012472 |
| 82 U  | 0.000000 | 0.000000 | 81 C  | 0.083333 | 0.018856 |
| 83 C  | 0.130000 | 0.106771 | 82 U  | 0.003333 | 0.004714 |
| 84 C  | 0.080000 | 0.080416 | 83 C  | 0.093333 | 0.016997 |
| 85 U  | 0.033333 | 0.024944 | 84 C  | 0.100000 | 0.021602 |
| 86 C  | 0.000000 | 0.000000 | 85 U  | 0.016667 | 0.016997 |
| 87 C  | 0.000000 | 0.000000 | 86 C  | 0.000000 | 0.000000 |
| 88 A  | 0.170000 | 0.131403 | 87 C  | 0.000000 | 0.000000 |
| 89 G  | 0.973333 | 0.269609 | 88 A  | 0.186667 | 0.061283 |
| 90 G  | 0.913333 | 0.179877 | 89 G  | 1.040000 | 0.139284 |
| 91 U  | 1.776667 | 0.461616 | 90 G  | 1.126667 | 0.018856 |
| 92 U  | 1.640000 | 0.386092 | 91 U  | 2.090000 | 0.077889 |
| 93 C  | 0.180000 | 0.122474 | 92 U  | 1.906667 | 0.041096 |
| 94 C  | 0.000000 | 0.000000 | 93 C  | 0.216667 | 0.018856 |
| 95 U  | 0.000000 | 0.000000 | 94 C  | 0.026667 | 0.024944 |
| 96 A  | 0.053333 | 0.047140 | 95 U  | 0.003333 | 0.004714 |
| 97 C  | 0.196667 | 0.145220 | 96 A  | 0.043333 | 0.016997 |
| 98 U  | 2.200000 | 0.267333 | 97 C  | 0.190000 | 0.115181 |
| 99 G  | 0.116667 | 0.074087 | 98 U  | 2.426667 | 0.208859 |
| 100 U | 0.000000 | 0.000000 | 99 G  | 0.233333 | 0.060185 |
| 101 U | 0.100000 | 0.114310 | 100 U | 0.100000 | 0.071181 |
| 102 G | 0.036667 | 0.051854 | 101 U | 0.450000 | 0.208327 |
| 103 A | 1.413333 | 0.395334 | 102 G | 0.540000 | 0.115758 |
| 104 U | 0.210000 | 0.081650 | 103 A | 1.723333 | 0.324277 |

|       |          |          |       |          |          |
|-------|----------|----------|-------|----------|----------|
| 105 C | 0.036667 | 0.051854 | 104 U | 0.283333 | 0.084984 |
| 106 C | 0.000000 | 0.000000 | 105 C | 0.026667 | 0.030912 |
| 107 C | 0.000000 | 0.000000 | 106 C | 0.013333 | 0.018856 |
| 108 G | 0.200000 | 0.069761 | 107 C | 0.000000 | 0.000000 |
| 109 C | 0.673333 | 0.233286 | 108 G | 0.070000 | 0.029439 |
| 110 G | 3.466667 | 0.170163 | 109 C | 0.506667 | 0.244994 |
| 111 G | 2.010000 | 0.503057 | 110 G | 3.223333 | 0.154128 |
| 112 G | 0.676667 | 0.097411 | 111 G | 2.070000 | 0.112250 |
| 113 U | 2.370000 | 0.229928 | 112 G | 0.650000 | 0.115758 |
| 114 C | 0.043333 | 0.047842 | 113 U | 2.373333 | 0.260811 |
| 115 G | 0.000000 | 0.000000 | 114 C | 0.093333 | 0.065997 |
| 116 G | 0.000000 | 0.000000 | 115 G | 0.036667 | 0.044969 |
| 117 G | 0.000000 | 0.000000 | 116 G | 0.016667 | 0.023570 |
| 118 A | 0.000000 | 0.000000 | 117 G | 0.000000 | 0.000000 |
| 119 C | 0.000000 | 0.000000 | 118 A | 0.000000 | 0.000000 |
| 120 A | 1.106667 | 0.156276 | 119 C | 0.000000 | 0.000000 |
| 121 G | 0.000000 | 0.000000 | 120 A | 1.420000 | 0.070711 |
| 122 U | 0.523333 | 0.082192 | 121 G | 0.206667 | 0.038586 |
| 123 U | 0.910000 | 0.028284 | 122 U | 0.963333 | 0.127628 |
| 124 G | 0.063333 | 0.018856 | 123 U | 1.166667 | 0.102740 |
| 125 G | 0.000000 | 0.000000 | 124 G | 0.090000 | 0.008165 |
| 126 C | 0.000000 | 0.000000 | 125 G | 0.013333 | 0.018856 |
| 127 G | 0.043333 | 0.032998 | 126 C | 0.033333 | 0.028674 |
| 128 C | 0.000000 | 0.000000 | 127 G | 0.050000 | 0.057155 |
| 129 C | 0.000000 | 0.000000 | 128 C | 0.000000 | 0.000000 |
| 130 C | 0.000000 | 0.000000 | 129 C | 0.000000 | 0.000000 |
| 131 A | 0.000000 | 0.000000 | 130 C | 0.000000 | 0.000000 |
| 132 A | 0.326667 | 0.030912 | 131 A | 0.010000 | 0.014142 |
| 133 C | 0.000000 | 0.000000 | 132 A | 0.380000 | 0.024495 |
| 134 G | 0.000000 | 0.000000 | 133 C | 0.010000 | 0.014142 |
| 135 U | 0.113333 | 0.067987 | 134 G | 0.003333 | 0.004714 |
| 136 G | 0.106667 | 0.052493 | 135 U | 0.040000 | 0.021602 |
| 137 G | 0.000000 | 0.000000 | 136 G | 0.076667 | 0.033993 |
| 138 G | 0.000000 | 0.000000 | 137 G | 0.010000 | 0.008165 |
| 139 G | 0.000000 | 0.000000 | 138 G | 0.000000 | 0.000000 |
| 140 C | 0.000000 | 0.000000 | 139 G | 0.040000 | 0.049666 |
| 141 U | 0.000000 | 0.000000 | 140 C | 0.000000 | 0.000000 |
| 142 G | 0.096667 | 0.038586 | 141 U | 0.003333 | 0.004714 |
| 143 G | 0.023333 | 0.032998 | 142 G | 0.070000 | 0.043205 |
| 144 A | 0.023333 | 0.032998 | 143 G | 0.000000 | 0.000000 |
| 145 U | 0.130000 | 0.066833 | 144 A | 0.013333 | 0.018856 |
| 146 A | 1.413333 | 0.228813 | 145 U | 0.226667 | 0.134247 |
| 147 C | 0.210000 | 0.035590 | 146 A | 1.623333 | 0.237954 |
| 148 G | 0.020000 | 0.028284 | 147 C | 0.286667 | 0.030912 |
| 149 A | 0.000000 | 0.000000 | 148 G | 0.006667 | 0.009428 |
| 150 G | nd       | nd       | 149 A | 0.000000 | 0.000000 |
| 151 G | nd       | nd       | 150 G | nd       | nd       |
| 152 G | nd       | nd       | 151 G | nd       | nd       |

|       |          |          |       |          |          |
|-------|----------|----------|-------|----------|----------|
| 153 A | nd       | nd       | 152 G | nd       | nd       |
| 154 A | 1.706667 | 0.567470 | 153 A | nd       | nd       |
| 155 U | 2.330000 | 0.423399 | 154 A | 1.383333 | 0.070396 |
| 156 U | 1.570000 | 0.432281 | 155 U | 1.956667 | 0.038586 |
| 157 U | 0.986667 | 0.526392 | 156 U | 1.393333 | 0.469491 |
| 158 C | 0.053333 | 0.075425 | 157 U | 0.526667 | 0.378095 |
| 159 G | 0.133333 | 0.044969 | 158 C | 0.000000 | 0.000000 |
| 160 U | 0.146667 | 0.030912 | 159 G | 0.060000 | 0.043205 |
| 161 G | 0.330000 | 0.035590 | 160 U | 0.056667 | 0.020548 |
| 162 A | 3.003333 | 0.587329 | 161 G | 0.186667 | 0.036818 |
| 163 G | 0.096667 | 0.041899 | 162 A | 2.886667 | 0.349889 |
| 164 G | 0.026667 | 0.037712 | 163 G | 0.070000 | 0.021602 |
| 165 A | 0.020000 | 0.028284 | 164 G | 0.003333 | 0.004714 |
| 166 A | 0.363333 | 0.012472 | 165 A | 0.000000 | 0.000000 |
| 167 G | 0.253333 | 0.036818 | 166 A | 0.283333 | 0.016997 |
| 168 A | 0.706667 | 0.185712 | 167 G | 0.213333 | 0.055578 |
| 169 C | 0.000000 | 0.000000 | 168 A | 0.623333 | 0.138884 |
| 170 G | 0.100000 | 0.069761 | 169 C | 0.000000 | 0.000000 |
| 171 A | 0.090000 | 0.127279 | 170 G | 0.063333 | 0.016997 |
| 172 C | 0.020000 | 0.028284 | 171 A | 0.203333 | 0.146591 |
| 173 G | 0.046667 | 0.032998 | 172 C | 0.570000 | 0.114310 |
| 174 C | 0.003333 | 0.004714 | 173 G | 0.066667 | 0.020548 |
| 175 G | 0.026667 | 0.037712 | 174 C | 0.046667 | 0.044969 |
| 176 U | 0.040000 | 0.042426 | 175 G | 0.253333 | 0.224252 |
| 177 U | 0.226667 | 0.023570 | 176 U | 0.026667 | 0.024944 |
| 178 C | 0.206667 | 0.132246 | 177 U | 0.286667 | 0.202704 |
| 179 G | 0.156667 | 0.106562 | 178 C | 0.020000 | 0.028284 |
| 180 C | 0.000000 | 0.000000 | 179 G | 0.073333 | 0.071336 |
| 181 C | 0.010000 | 0.014142 | 180 C | 0.093333 | 0.131993 |
| 182 G | 0.453333 | 0.138163 | 181 C | 0.046667 | 0.036818 |
| 183 G | 0.720000 | 0.077889 | 182 G | 0.490000 | 0.014142 |
| 184 C | 0.126667 | 0.115854 | 183 G | 1.020000 | 0.275318 |
| 185 C | 0.346667 | 0.049889 | 184 C | 0.733333 | 0.111455 |
| 186 G | 0.036667 | 0.030912 | 185 C | 0.563333 | 0.148847 |
| 187 G | 0.210000 | 0.148549 | 186 G | 0.276667 | 0.102740 |
| 188 C | 0.090000 | 0.088318 | 187 G | 1.403333 | 1.031515 |
| 189 G | 0.000000 | 0.000000 | 188 C | 3.406667 | 0.912226 |
| 190 A | 0.106667 | 0.111156 | 189 G | 0.723333 | 0.511621 |
| 191 U | 0.296667 | 0.211397 | 190 A | 0.263333 | 0.198718 |
| 192 U | 0.973333 | 0.754954 | 191 U | 0.153333 | 0.057927 |
| 193 A | 0.443333 | 0.124989 | 192 U | 1.283333 | 0.732909 |
| 194 A | 0.393333 | 0.123918 | 193 A | 0.473333 | 0.062361 |
| 195 A | 0.296667 | 0.057349 | 194 A | 0.360000 | 0.077889 |
| 196 A | 0.203333 | 0.020548 | 195 A | 0.333333 | 0.049216 |
| 197 G | 0.340000 | 0.069761 | 196 A | 0.350000 | 0.040825 |
| 198 U | 0.343333 | 0.139124 | 197 G | 0.720000 | 0.092014 |
| 199 G | 0.806667 | 0.171529 | 198 U | 0.850000 | 0.089815 |
| 200 A | 0.800000 | 0.094163 | 199 G | 0.970000 | 0.092736 |

|       |          |          |       |          |          |
|-------|----------|----------|-------|----------|----------|
| 201 A | 0.690000 | 0.078740 | 200 A | 0.883333 | 0.092856 |
| 202 A | 0.690000 | 0.057155 | 201 A | 0.833333 | 0.036818 |
| 203 G | 0.900000 | 0.151217 | 202 A | 0.980000 | 0.205426 |
| 204 U | 1.220000 | 0.866526 | 203 G | 1.336667 | 0.343058 |
| 205 A | 0.896667 | 0.634683 | 204 U | 1.860000 | 1.522783 |
| 206 A | 0.973333 | 0.317945 | 205 A | 1.436667 | 0.204179 |
| 207 A | 0.323333 | 0.228668 | 206 A | 1.323333 | 0.268370 |
| 208 C | 0.093333 | 0.087305 | 207 A | 0.146667 | 0.207418 |
| 209 U | 0.073333 | 0.018856 | 208 C | 0.060000 | 0.071181 |
| 210 C | 0.056667 | 0.060185 | 209 U | 0.036667 | 0.051854 |
| 211 U | 0.060000 | 0.024495 | 210 C | 0.113333 | 0.060185 |
| 212 C | 0.046667 | 0.024944 | 211 U | 0.123333 | 0.024944 |
| 213 U | 0.066667 | 0.067987 | 212 C | 0.113333 | 0.055578 |
| 214 U | 0.400000 | 0.117757 | 213 U | 0.420000 | 0.253903 |
| 215 G | 0.423333 | 0.078457 | 214 U | 0.610000 | 0.042426 |
| 216 G | 0.233333 | 0.118134 | 215 G | 0.583333 | 0.104030 |
| 217 C | 0.086667 | 0.122565 | 216 G | 0.096667 | 0.136707 |
| 218 C | 0.193333 | 0.130213 | 217 C | 0.000000 | 0.000000 |
| 219 G | 0.146667 | 0.028674 | 218 C | 0.023333 | 0.026247 |
| 220 C | 0.030000 | 0.035590 | 219 G | 0.000000 | 0.000000 |
| 221 C | 0.066667 | 0.074087 | 220 C | 0.043333 | 0.047842 |
| 222 G | 0.153333 | 0.054365 | 221 C | 0.073333 | 0.026247 |
| 223 C | 0.126667 | 0.028674 | 222 G | 0.020000 | 0.028284 |
| 224 G | 0.030000 | 0.021602 | 223 C | 0.036667 | 0.032998 |
| 225 G | 0.003333 | 0.004714 | 224 G | 0.060000 | 0.045461 |
| 226 G | 0.870000 | 0.318224 | 225 G | 0.166667 | 0.142673 |
| 227 A | 2.913333 | 0.629144 | 226 G | 1.080000 | 0.253114 |
| 228 A | 2.493333 | 0.284527 | 227 A | 2.823333 | 0.484516 |
| 229 C | 0.883333 | 0.209974 | 228 A | 2.120000 | 0.642495 |
| 230 C | 0.980000 | 0.165126 | 229 C | 0.726667 | 0.133000 |
| 231 U | 2.980000 | 0.227596 | 230 C | 0.966667 | 0.054365 |
| 232 G | 2.046667 | 0.124722 | 231 U | 2.400000 | 0.407676 |
| 233 C | 0.270000 | 0.152971 | 232 G | 1.310000 | 0.523259 |
| 234 C | 0.083333 | 0.062361 | 233 C | 0.020000 | 0.028284 |
| 235 G | 0.036667 | 0.016997 | 234 C | 0.003333 | 0.004714 |
| 236 C | 0.000000 | 0.000000 | 235 G | 0.026667 | 0.037712 |
| 237 G | 0.063333 | 0.033993 | 236 C | 0.076667 | 0.061283 |
| 238 U | 0.106667 | 0.032998 | 237 G | 0.136667 | 0.041899 |
| 239 U | 0.270000 | 0.097980 | 238 U | 0.263333 | 0.041899 |
| 240 G | 0.286667 | 0.228813 | 239 U | 0.233333 | 0.052493 |
| 241 G | 0.506667 | 0.154344 | 240 G | 0.133333 | 0.032998 |
| 242 A | 2.346667 | 0.044969 | 241 G | 0.336667 | 0.036818 |
| 243 C | 0.323333 | 0.293295 | 242 A | 2.076667 | 0.220958 |
| 244 C | 0.226667 | 0.206774 | 243 C | 0.023333 | 0.032998 |
| 245 U | 0.266667 | 0.136951 | 244 C | 0.000000 | 0.000000 |
| 246 G | 0.150000 | 0.063770 | 245 U | 0.133333 | 0.023570 |
| 247 A | 0.183333 | 0.098770 | 246 G | 0.080000 | 0.040825 |
| 248 A | 0.176667 | 0.078457 | 247 A | 0.160000 | 0.040825 |

|       |          |          |       |          |          |
|-------|----------|----------|-------|----------|----------|
| 249 A | 0.023333 | 0.016997 | 248 A | 0.193333 | 0.012472 |
| 250 G | 0.026667 | 0.037712 | 249 A | 0.073333 | 0.049889 |
| 251 U | 0.350000 | 0.251529 | 250 G | 0.063333 | 0.089567 |
| 252 A | 0.560000 | 0.481318 | 251 U | 0.636667 | 0.553795 |
| 253 A | 0.823333 | 0.404750 | 252 A | 0.923333 | 0.108423 |
| 254 G | 1.266667 | 0.324996 | 253 A | 0.806667 | 0.110855 |
| 255 U | 1.423333 | 0.041899 | 254 G | 1.040000 | 0.117757 |
| 256 G | 0.703333 | 0.046428 | 255 U | 1.713333 | 0.100775 |
| 257 U | 1.070000 | 0.371573 | 256 G | 0.876667 | 0.128149 |
| 258 U | 0.536667 | 0.218530 | 257 U | 1.406667 | 0.032998 |
| 259 G | 0.033333 | 0.033993 | 258 U | 0.843333 | 0.026247 |
| 260 C | 0.000000 | 0.000000 | 259 G | 0.000000 | 0.000000 |
| 261 G | 0.316667 | 0.131233 | 260 C | 0.090000 | 0.073485 |
| 262 C | 0.016667 | 0.023570 | 261 G | 0.303333 | 0.083400 |
| 263 U | 0.163333 | 0.044969 | 262 C | 0.220000 | 0.156418 |
| 264 C | 0.200000 | 0.241661 | 263 U | 0.216667 | 0.060185 |
| 265 G | 0.626667 | 0.078457 | 264 C | 0.623333 | 0.220656 |
| 266 G | 0.386667 | 0.137194 | 265 G | 0.743333 | 0.067987 |
| 267 A | 1.390000 | 0.228619 | 266 G | 0.810000 | 0.149666 |
| 268 U | 1.333333 | 1.006059 | 267 A | 0.923333 | 0.842589 |
| 269 A | 0.906667 | 0.089938 | 268 U | 0.950000 | 0.715402 |
| 270 U | 1.010000 | 0.102307 | 269 A | 0.430000 | 0.118603 |
| 271 G | 0.096667 | 0.036818 | 270 U | 0.403333 | 0.026247 |
| 272 G | 0.026667 | 0.018856 | 271 G | 0.000000 | 0.000000 |
| 273 G | 0.000000 | 0.000000 | 272 G | 0.003333 | 0.004714 |
| 274 G | 0.023333 | 0.032998 | 273 G | 0.033333 | 0.028674 |
| 275 C | 0.036667 | 0.051854 | 274 G | 0.046667 | 0.059067 |
| 276 A | 0.023333 | 0.032998 | 275 C | 0.000000 | 0.000000 |
| 277 A | 0.130000 | 0.071181 | 276 A | 0.143333 | 0.114407 |
| 278 G | 0.096667 | 0.060185 | 277 A | 0.026667 | 0.020548 |
| 279 A | 0.603333 | 0.147045 | 278 G | 0.180000 | 0.048990 |
| 280 A | 0.503333 | 0.053125 | 279 A | 0.816667 | 0.089938 |
| 281 U | 0.983333 | 0.055578 | 280 A | 1.140000 | 0.184572 |
| 282 U | 0.533333 | 0.358732 | 281 U | 0.533333 | 0.754247 |
| 283 A | 0.450000 | 0.237908 | 282 U | 0.680000 | 0.961665 |
| 284 A | 0.310000 | 0.241799 | 283 A | 2.623333 | 0.365726 |
| 285 G | 0.400000 | 0.275802 | 284 U | 1.840000 | 0.312730 |
| 286 C | 0.120000 | 0.088318 | 285 U | 0.676667 | 0.956951 |
| 287 C | 0.000000 | 0.000000 | 286 A | 1.760000 | 0.179072 |
| 288 A | 0.186667 | 0.024944 | 287 A | 1.200000 | 0.123558 |
| 289 G | 0.073333 | 0.032998 | 288 A | 0.763333 | 0.051854 |
| 290 C | 0.110000 | 0.089815 | 289 G | 0.000000 | 0.000000 |
| 291 A | 0.543333 | 0.032998 | 290 A | 0.000000 | 0.000000 |
| 292 U | 0.573333 | 0.198718 | 291 C | 0.090000 | 0.077889 |
| 293 G | 0.560000 | 0.028284 | 292 A | 0.073333 | 0.033993 |
| 294 A | 0.410000 | 0.058878 | 293 C | 0.013333 | 0.018856 |
| 295 A | 0.246667 | 0.112645 | 294 G | 0.000000 | 0.000000 |
| 296 C | 0.263333 | 0.054365 | 295 G | 0.033333 | 0.012472 |

|       |          |          |       |          |          |
|-------|----------|----------|-------|----------|----------|
| 297 G | 0.310000 | 0.212289 | 296 G | 0.030000 | 0.008165 |
| 298 U | 0.273333 | 0.130979 | 297 G | 0.013333 | 0.018856 |
| 299 U | 0.533333 | 0.135236 | 298 A | 0.016667 | 0.023570 |
| 300 A | 1.753333 | 0.459009 | 299 G | 0.070000 | 0.098995 |
| 301 U | 0.670000 | 0.253903 | 300 U | 0.110000 | 0.155563 |
| 302 G | 2.083333 | 0.255908 | 301 A | 0.190000 | 0.085245 |
| 303 U | 2.170000 | 0.128323 | 302 A | 0.033333 | 0.024944 |
| 304 A | 3.320000 | 0.223756 | 303 A | 0.193333 | 0.140554 |
| 305 G | 1.746667 | 0.070396 | 304 G | 0.083333 | 0.032998 |
| 306 A | 0.860000 | 0.037417 | 305 G | 0.080000 | 0.061644 |
| 307 A | 0.320000 | 0.219241 | 306 U | 0.090000 | 0.127279 |
| 308 C | 0.726667 | 0.534436 | 307 U | 0.186667 | 0.263987 |
| 309 A | 0.790000 | 0.065320 | 308 A | 0.413333 | 0.208540 |
| 310 A | 0.433333 | 0.030912 | 309 A | 0.220000 | 0.151217 |
| 311 U | 0.813333 | 0.167796 | 310 A | 0.093333 | 0.131993 |
| 312 U | 1.056667 | 0.193964 | 311 U | 0.080000 | 0.113137 |
| 313 G | 0.836667 | 0.144299 | 312 A | 0.260000 | 0.113137 |
| 314 A | 1.036667 | 0.328261 | 313 U | 0.443333 | 0.075425 |
| 315 A | 0.663333 | 0.238094 | 314 G | 0.633333 | 0.036818 |
| 316 G | 0.013333 | 0.018856 | 315 C | 0.076667 | 0.065490 |
| 317 C | 0.000000 | 0.000000 | 316 U | 0.186667 | 0.132246 |
| 318 A | 0.053333 | 0.068475 | 317 G | 0.293333 | 0.041096 |
| 319 G | 0.000000 | 0.000000 | 318 A | 0.403333 | 0.087305 |
| 320 G | 0.000000 | 0.000000 | 319 U | 0.000000 | 0.000000 |
| 321 C | 0.000000 | 0.000000 | 320 C | 0.000000 | 0.000000 |
| 322 U | 0.000000 | 0.000000 | 321 U | 0.196667 | 0.117851 |
| 323 U | 0.303333 | 0.057349 | 322 U | 0.210000 | 0.049666 |
| 324 U | 0.326667 | 0.233286 | 323 U | 0.270000 | 0.049666 |
| 325 A | 1.410000 | 0.071181 | 324 U | 0.406667 | 0.033993 |
| 326 A | 1.503333 | 0.075865 | 325 G | 0.406667 | 0.104030 |
| 327 A | 1.280000 | 0.258070 | 326 A | 0.420000 | 0.205426 |
| 328 G | 0.110000 | 0.053541 | 327 A | 0.253333 | 0.094634 |
| 329 A | 0.003333 | 0.004714 | 328 A | 0.060000 | 0.042426 |
| 330 C | 0.000000 | 0.000000 | 329 U | 0.190000 | 0.134907 |
| 331 A | 0.000000 | 0.000000 | 330 U | 0.480000 | 0.339509 |
| 332 C | 0.060000 | 0.035590 | 331 U | 0.370000 | 0.021602 |
| 333 G | 0.080000 | 0.078740 | 332 U | 0.403333 | 0.018856 |
| 334 G | 0.176667 | 0.110855 | 333 U | 0.363333 | 0.016997 |
| 335 G | 0.036667 | 0.051854 | 334 U | 0.493333 | 0.041899 |
| 336 G | 0.033333 | 0.028674 | 335 G | 0.320000 | 0.128323 |
| 337 A | 0.000000 | 0.000000 | 336 A | 0.293333 | 0.208060 |
| 338 G | 0.006667 | 0.009428 | 337 U | 0.060000 | 0.084853 |
| 339 U | 0.200000 | 0.163299 | 338 U | 0.000000 | 0.000000 |
| 340 A | 0.406667 | 0.044969 | 339 U | 0.000000 | 0.000000 |
| 341 A | 0.160000 | 0.205426 | 340 U | 0.076667 | 0.108423 |
| 342 A | 0.080000 | 0.099331 | 341 G | 0.056667 | 0.080139 |
| 343 G | 0.093333 | 0.041096 | 342 U | 0.050000 | 0.070711 |
| 344 G | 0.000000 | 0.000000 | 343 G | 0.153333 | 0.009428 |



|       |          |          |       |          |          |
|-------|----------|----------|-------|----------|----------|
| 345 U | 0.373333 | 0.172498 | 344 A | 0.146667 | 0.047140 |
| 346 U | 1.196667 | 0.450358 | 345 A | 0.180000 | 0.029439 |
| 347 A | 1.090000 | 0.074833 | 346 G | 0.206667 | 0.049889 |
| 348 A | 0.946667 | 0.138163 | 347 G | 0.336667 | 0.233286 |
| 349 A | 1.036667 | 0.147045 | 348 A | 0.050000 | 0.070711 |
| 350 U | 0.310000 | 0.219241 | 349 U | 0.016667 | 0.023570 |
| 351 A | 0.626667 | 0.054365 | 350 A | 1.366667 | 0.243630 |
| 352 U | 0.886667 | 0.105304 | 351 C | 0.163333 | 0.057927 |
| 353 G | 0.226667 | 0.024944 | 352 U | 0.993333 | 0.036818 |
| 354 C | 0.000000 | 0.000000 | 353 U | 1.020000 | 0.084853 |
| 355 U | 0.100000 | 0.081650 | 354 G | 0.066667 | 0.041899 |
| 356 G | 0.266667 | 0.188739 | 355 U | 0.023333 | 0.016997 |
| 357 A | 0.560000 | 0.288560 | 356 C | 0.033333 | 0.047140 |
| 358 U | 0.483333 | 0.350460 | 357 C | 0.166667 | 0.127628 |
| 359 A | 2.996667 | 0.305760 | 358 U | 0.823333 | 0.582313 |
| 360 C | 0.063333 | 0.044969 | 359 U | 0.473333 | 0.335592 |
| 361 U | 0.243333 | 0.152825 | 360 G | 0.033333 | 0.028674 |
| 362 U | 0.340000 | 0.050990 | 361 G | 0.083333 | 0.062361 |
| 363 G | 0.126667 | 0.066500 | 362 U | 0.253333 | 0.179877 |
| 364 U | 0.043333 | 0.024944 | 363 U | 0.090000 | 0.014142 |
| 365 C | 0.000000 | 0.000000 | 364 U | 0.000000 | 0.000000 |
| 366 C | 0.000000 | 0.000000 | 365 C | 0.000000 | 0.000000 |
| 367 U | 0.000000 | 0.000000 | 366 C | 0.220000 | 0.070711 |
| 368 U | 0.023333 | 0.032998 | 367 G | 0.306667 | 0.433692 |
| 369 G | 0.000000 | 0.000000 | 368 C | 4.556667 | 1.415917 |
| 370 G | 0.010000 | 0.014142 | 369 A | 3.680000 | 0.782347 |
| 371 U | 0.043333 | 0.061283 | 370 A | 1.196667 | 0.247296 |
| 372 U | 0.113333 | 0.111455 | 371 G | 0.763333 | 0.260427 |
| 373 U | 0.053333 | 0.030912 | 372 A | 1.110000 | 0.227596 |
| 374 C | 0.066667 | 0.094281 | 373 G | 0.043333 | 0.036818 |
| 375 C | 0.520000 | 0.405709 | 374 G | 0.000000 | 0.000000 |
| 376 G | 1.176667 | 0.578638 | 375 G | 0.043333 | 0.041899 |
| 377 C | 2.510000 | 1.501399 | 376 A | 0.023333 | 0.020548 |
| 378 A | 6.720000 | 0.867333 | 377 A | 0.030000 | 0.021602 |
| 379 A | 2.396667 | 0.202375 | 378 C | 0.006667 | 0.009428 |
| 380 G | 2.110000 | 0.179072 | 379 C | 0.003333 | 0.004714 |
| 381 A | 2.313333 | 0.098770 | 380 A | 0.096667 | 0.136707 |
| 382 G | 0.076667 | 0.012472 | 381 U | 0.000000 | 0.000000 |
| 383 G | 0.000000 | 0.000000 | 382 A | 0.330000 | 0.045461 |
| 384 G | 0.000000 | 0.000000 | 383 G | 0.090000 | 0.127279 |
| 385 A | 0.000000 | 0.000000 | 384 A | 0.000000 | 0.000000 |
| 386 A | 0.006667 | 0.009428 | 385 U | 0.000000 | 0.000000 |
| 387 C | 0.000000 | 0.000000 | 386 A | 0.216667 | 0.306413 |
| 388 C | 0.000000 | 0.000000 | 387 U | 0.046667 | 0.065997 |
| 389 A | 0.000000 | 0.000000 | 388 U | 0.000000 | 0.000000 |
| 390 U | 0.456667 | 0.360031 | 389 A | 0.000000 | 0.000000 |
| 391 A | 0.563333 | 0.047842 | 390 A | 0.173333 | 0.231132 |
| 392 G | 0.143333 | 0.071336 | 391 A | 0.320000 | 0.158955 |

|       |          |          |       |          |          |
|-------|----------|----------|-------|----------|----------|
| 393 A | 0.063333 | 0.089567 | 392 C | 0.223333 | 0.095336 |
| 394 U | 0.046667 | 0.065997 |       |          |          |
| 395 A | 0.696667 | 0.082192 |       |          |          |
| 396 U | 0.286667 | 0.153261 |       |          |          |
| 397 U | 0.000000 | 0.000000 |       |          |          |
| 398 A | 0.340000 | 0.082865 |       |          |          |
| 399 A | 0.396667 | 0.067987 |       |          |          |
| 400 A | 0.590000 | 0.115758 |       |          |          |
| 401 C | 0.476667 | 0.024944 |       |          |          |
| 402 G | 0.110000 | 0.094163 |       |          |          |
| 403 G | 0.023333 | 0.032998 |       |          |          |
| 404 U | 0.136667 | 0.096724 |       |          |          |
| 405 G | 0.023333 | 0.032998 |       |          |          |

**RK18**

| seqNum | seqRNA | Mean value | Standard dev. |
|--------|--------|------------|---------------|
| 29     | C      | 1.350000   | 0.580861      |
| 30     | A      | 0.600000   | 0.280832      |
| 31     | C      | 0.393333   | 0.225290      |
| 32     | U      | 0.093333   | 0.077603      |
| 33     | G      | 0.070000   | 0.050990      |
| 34     | U      | 0.016667   | 0.023570      |
| 35     | C      | 0.086667   | 0.054365      |
| 36     | U      | 0.010000   | 0.014142      |
| 37     | U      | 0.103333   | 0.049216      |
| 38     | G      | 0.093333   | 0.038586      |
| 39     | U      | 0.003333   | 0.004714      |
| 40     | C      | 0.080000   | 0.048990      |
| 41     | U      | 0.116667   | 0.164992      |
| 42     | C      | 0.353333   | 0.109646      |
| 43     | C      | 1.490000   | 0.882156      |
| 44     | A      | 0.366667   | 0.211713      |
| 45     | U      | 0.363333   | 0.197540      |
| 46     | U      | 0.266667   | 0.181537      |
| 47     | U      | 0.246667   | 0.089938      |
| 48     | C      | 0.156667   | 0.074087      |
| 49     | U      | 0.086667   | 0.041096      |
| 50     | U      | 0.130000   | 0.058878      |
| 51     | G      | 0.120000   | 0.065320      |
| 52     | U      | 0.090000   | 0.061644      |
| 53     | G      | 0.050000   | 0.024495      |
| 54     | U      | 0.096667   | 0.054365      |
| 55     | C      | 0.146667   | 0.054365      |
| 56     | U      | 0.140000   | 0.069761      |
| 57     | C      | 0.146667   | 0.069442      |
| 58     | U      | 0.000000   | 0.000000      |
| 59     | U      | 0.043333   | 0.061283      |
| 60     | G      | 0.056667   | 0.038586      |
| 61     | U      | 0.116667   | 0.057927      |
| 62     | U      | 0.593333   | 0.091043      |
| 63     | C      | 0.063333   | 0.044969      |
| 64     | C      | 0.000000   | 0.000000      |
| 65     | C      | 0.000000   | 0.000000      |
| 66     | U      | 0.146667   | 0.166800      |
| 67     | U      | 1.340000   | 0.376652      |
| 68     | C      | 3.133333   | 0.660421      |
| 69     | A      | 1.210000   | 0.325372      |
| 70     | A      | 0.763333   | 0.212498      |
| 71     | U      | 0.356667   | 0.135974      |
| 72     | U      | 0.090000   | 0.064807      |
| 73     | C      | 0.046667   | 0.041096      |
| 74     | C      | 0.000000   | 0.000000      |

**RK19**

| seqNum | seqRNA | Mean value | Standard dev. |
|--------|--------|------------|---------------|
| 25     | A      | 0.000000   | 0.000000      |
| 26     | G      | 0.033333   | 0.047140      |
| 27     | A      | 0.496667   | 0.052493      |
| 28     | A      | 0.710000   | 0.014142      |
| 29     | C      | 0.576667   | 0.077603      |
| 30     | A      | 0.653333   | 0.081786      |
| 31     | C      | 0.193333   | 0.073182      |
| 32     | U      | 0.083333   | 0.059067      |
| 33     | G      | 0.050000   | 0.040825      |
| 34     | U      | 0.000000   | 0.000000      |
| 35     | C      | 0.026667   | 0.023570      |
| 36     | U      | 0.000000   | 0.000000      |
| 37     | U      | 0.040000   | 0.021602      |
| 38     | G      | 0.183333   | 0.030912      |
| 39     | U      | 0.080000   | 0.048990      |
| 40     | C      | 0.063333   | 0.041899      |
| 41     | U      | 0.026667   | 0.037712      |
| 42     | C      | 0.123333   | 0.167398      |
| 43     | C      | 0.276667   | 0.242258      |
| 44     | A      | 0.093333   | 0.131993      |
| 45     | U      | 0.233333   | 0.180616      |
| 46     | U      | 0.303333   | 0.082597      |
| 47     | U      | 0.346667   | 0.026247      |
| 48     | C      | 0.096667   | 0.020548      |
| 49     | U      | 0.186667   | 0.083799      |
| 50     | U      | 0.356667   | 0.030912      |
| 51     | G      | 0.046667   | 0.016997      |
| 52     | U      | 0.083333   | 0.074087      |
| 53     | G      | 0.133333   | 0.041899      |
| 54     | U      | 0.056667   | 0.054365      |
| 55     | C      | 0.056667   | 0.066500      |
| 56     | U      | 0.023333   | 0.032998      |
| 57     | C      | 0.010000   | 0.014142      |
| 58     | U      | 0.000000   | 0.000000      |
| 59     | U      | 0.026667   | 0.018856      |
| 60     | G      | 0.020000   | 0.028284      |
| 61     | U      | 0.123333   | 0.047842      |
| 62     | U      | 0.900000   | 0.152971      |
| 63     | C      | 0.096667   | 0.071336      |
| 64     | C      | 0.000000   | 0.000000      |
| 65     | C      | 0.000000   | 0.000000      |
| 66     | U      | 0.023333   | 0.032998      |
| 67     | U      | 0.186667   | 0.249978      |
| 68     | C      | 0.126667   | 0.179134      |
| 69     | A      | 0.283333   | 0.126579      |
| 70     | A      | 0.536667   | 0.092856      |

|       |          |          |       |          |          |
|-------|----------|----------|-------|----------|----------|
| 75 C  | 0.136667 | 0.172498 | 71 U  | 0.290000 | 0.084853 |
| 76 A  | 0.100000 | 0.029439 | 72 U  | 0.210000 | 0.029439 |
| 77 C  | 0.143333 | 0.100775 | 73 C  | 0.023333 | 0.016997 |
| 78 U  | 0.090000 | 0.037417 | 74 C  | 0.000000 | 0.000000 |
| 79 C  | 0.133333 | 0.089567 | 75 C  | 0.000000 | 0.000000 |
| 80 C  | 0.123333 | 0.067987 | 76 A  | 0.013333 | 0.018856 |
| 81 C  | 0.130000 | 0.094163 | 77 C  | 0.106667 | 0.099778 |
| 82 U  | 0.046667 | 0.036818 | 78 U  | 0.143333 | 0.054365 |
| 83 C  | 0.150000 | 0.086023 | 79 C  | 0.046667 | 0.012472 |
| 84 C  | 0.166667 | 0.086538 | 80 C  | 0.040000 | 0.037417 |
| 85 U  | 0.063333 | 0.038586 | 81 C  | 0.023333 | 0.020548 |
| 86 C  | 0.016667 | 0.023570 | 82 U  | 0.033333 | 0.023570 |
| 87 C  | 0.010000 | 0.014142 | 83 C  | 0.046667 | 0.032998 |
| 88 A  | 0.093333 | 0.073636 | 84 C  | 0.090000 | 0.032660 |
| 89 G  | 0.573333 | 0.074087 | 85 U  | 0.053333 | 0.041899 |
| 90 G  | 0.646667 | 0.089938 | 86 C  | 0.056667 | 0.080139 |
| 91 U  | 1.073333 | 0.038586 | 87 C  | 0.000000 | 0.000000 |
| 92 U  | 1.056667 | 0.049889 | 88 A  | 0.000000 | 0.000000 |
| 93 C  | 0.376667 | 0.248507 | 89 G  | 0.663333 | 0.111156 |
| 94 C  | 0.106667 | 0.150849 | 90 G  | 0.820000 | 0.131403 |
| 95 U  | 0.213333 | 0.089938 | 91 U  | 1.376667 | 0.087305 |
| 96 A  | 0.040000 | 0.016330 | 92 U  | 1.470000 | 0.134412 |
| 97 C  | 0.303333 | 0.104030 | 93 C  | 0.350000 | 0.037417 |
| 98 U  | 1.473333 | 0.091043 | 94 C  | 0.050000 | 0.050990 |
| 99 G  | 0.320000 | 0.056569 | 95 U  | 0.006667 | 0.009428 |
| 100 U | 0.046667 | 0.018856 | 96 A  | 0.066667 | 0.047842 |
| 101 U | 0.290000 | 0.085245 | 97 C  | 0.136667 | 0.052493 |
| 102 G | 0.390000 | 0.057155 | 98 U  | 1.633333 | 0.077172 |
| 103 A | 0.880000 | 0.141421 | 99 G  | 0.270000 | 0.058878 |
| 104 U | 0.283333 | 0.065997 | 100 U | 0.140000 | 0.104243 |
| 105 C | 0.226667 | 0.165193 | 101 U | 0.360000 | 0.135892 |
| 106 C | 0.120000 | 0.085245 | 102 G | 0.420000 | 0.106771 |
| 107 C | 0.086667 | 0.115566 | 103 A | 0.976667 | 0.143372 |
| 108 G | 0.060000 | 0.070711 | 104 U | 0.200000 | 0.029439 |
| 109 C | 0.603333 | 0.167796 | 105 C | 0.110000 | 0.037417 |
| 110 G | 2.433333 | 0.296348 | 106 C | 0.023333 | 0.032998 |
| 111 G | 1.936667 | 0.193448 | 107 C | 0.006667 | 0.009428 |
| 112 G | 1.063333 | 0.153261 | 108 G | 0.063333 | 0.036818 |
| 113 U | 2.046667 | 0.143836 | 109 C | 0.590000 | 0.040825 |
| 114 C | 0.386667 | 0.078457 | 110 G | 2.476667 | 0.078457 |
| 115 G | 0.040000 | 0.008165 | 111 G | 1.803333 | 0.060185 |
| 116 G | 0.000000 | 0.000000 | 112 G | 0.873333 | 0.004714 |
| 117 G | 0.000000 | 0.000000 | 113 U | 2.046667 | 0.054365 |
| 118 A | 0.000000 | 0.000000 | 114 C | 0.230000 | 0.099331 |
| 119 C | 1.620000 | 0.466762 | 115 G | 0.003333 | 0.004714 |
| 120 A | 1.516667 | 0.196016 | 116 G | 0.000000 | 0.000000 |
| 121 G | 0.660000 | 0.257811 | 117 G | 0.000000 | 0.000000 |
| 122 U | 0.950000 | 0.297097 | 118 A | 0.000000 | 0.000000 |

|       |          |          |       |          |          |
|-------|----------|----------|-------|----------|----------|
| 123 U | 0.573333 | 0.264491 | 119 C | 0.040000 | 0.056569 |
| 124 G | 0.056667 | 0.041899 | 120 A | 1.643333 | 0.041096 |
| 125 G | 0.076667 | 0.065997 | 121 G | 0.920000 | 0.203142 |
| 126 C | 0.163333 | 0.110855 | 122 U | 1.193333 | 0.108730 |
| 127 G | 0.090000 | 0.106771 | 123 U | 0.836667 | 0.047842 |
| 128 C | 0.213333 | 0.153261 | 124 G | 0.050000 | 0.035590 |
| 129 C | 0.000000 | 0.000000 | 125 G | 0.003333 | 0.004714 |
| 130 C | 0.000000 | 0.000000 | 126 C | 0.076667 | 0.020548 |
| 131 A | 0.016667 | 0.023570 | 127 G | 0.060000 | 0.084853 |
| 132 A | 0.220000 | 0.053541 | 128 C | 0.000000 | 0.000000 |
| 133 C | 0.050000 | 0.040825 | 129 C | 0.000000 | 0.000000 |
| 134 G | 0.026667 | 0.037712 | 130 C | 0.000000 | 0.000000 |
| 135 U | 0.000000 | 0.000000 | 131 A | 0.000000 | 0.000000 |
| 136 G | 0.006667 | 0.009428 | 132 A | 0.000000 | 0.000000 |
| 137 G | 0.043333 | 0.041899 | 133 C | 0.000000 | 0.000000 |
| 138 G | 0.373333 | 0.407376 | 134 G | 0.000000 | 0.000000 |
| 139 G | 0.200000 | 0.092736 | 135 U | 0.000000 | 0.000000 |
| 140 C | 0.146667 | 0.207418 | 136 G | 0.056667 | 0.060185 |
| 141 U | 0.000000 | 0.000000 | 137 G | 0.086667 | 0.122565 |
| 142 G | 0.000000 | 0.000000 | 138 G | 0.000000 | 0.000000 |
| 143 G | 0.000000 | 0.000000 | 139 G | 0.020000 | 0.028284 |
| 144 A | 0.160000 | 0.114310 | 140 C | 0.000000 | 0.000000 |
| 145 U | 0.770000 | 0.398079 | 141 U | 0.000000 | 0.000000 |
| 146 A | 0.756667 | 0.114407 | 142 G | 0.063333 | 0.089567 |
| 147 C | 0.043333 | 0.061283 | 143 G | 0.000000 | 0.000000 |
| 148 G | 0.046667 | 0.065997 | 144 A | 0.000000 | 0.000000 |
| 149 A | 0.000000 | 0.000000 | 145 U | 0.123333 | 0.153695 |
| 150 G | nd       | nd       | 146 A | 0.863333 | 0.175563 |
| 151 G | nd       | nd       | 147 C | 0.136667 | 0.103387 |
| 152 G | nd       | nd       | 148 G | 0.000000 | 0.000000 |
| 153 A | nd       | nd       | 149 A | 0.000000 | 0.000000 |
| 154 A | nd       | nd       | 150 G | 0.000000 | 0.000000 |
| 155 U | 1.263333 | 0.674553 | 151 G | 0.000000 | 0.000000 |
| 156 U | 0.713333 | 0.290325 | 152 G | 0.000000 | 0.000000 |
| 157 U | 0.980000 | 0.292233 | 153 A | 0.000000 | 0.000000 |
| 158 C | 0.076667 | 0.094634 | 154 A | 0.000000 | 0.000000 |
| 159 G | 0.000000 | 0.000000 | 155 U | 1.683333 | 0.524680 |
| 160 U | 0.016667 | 0.023570 | 156 U | 1.076667 | 0.228813 |
| 161 G | 0.126667 | 0.102089 | 157 U | 1.186667 | 0.156276 |
| 162 A | 1.063333 | 0.226471 | 158 C | 0.053333 | 0.075425 |
| 163 G | 0.140000 | 0.077889 | 159 G | 0.040000 | 0.028284 |
| 164 G | 0.026667 | 0.037712 | 160 U | 0.006667 | 0.009428 |
| 165 A | 0.056667 | 0.080139 | 161 G | 0.013333 | 0.012472 |
| 166 A | 0.256667 | 0.046428 | 162 A | 1.330000 | 0.270678 |
| 167 G | 0.160000 | 0.008165 | 163 G | 0.016667 | 0.012472 |
| 168 A | 0.390000 | 0.035590 | 164 G | 0.040000 | 0.049666 |
| 169 C | 0.096667 | 0.041096 | 165 A | 0.150000 | 0.126754 |
| 170 G | 0.060000 | 0.021602 | 166 A | 0.526667 | 0.073182 |

|       |          |          |       |          |          |
|-------|----------|----------|-------|----------|----------|
| 171 A | 0.170000 | 0.134907 | 167 G | 0.386667 | 0.115566 |
| 172 C | 0.100000 | 0.077889 | 168 A | 0.683333 | 0.077172 |
| 173 G | 0.056667 | 0.016997 | 169 C | 0.126667 | 0.059067 |
| 174 C | 0.043333 | 0.030912 | 170 G | 0.150000 | 0.016330 |
| 175 G | 0.046667 | 0.059067 | 171 A | 0.186667 | 0.123648 |
| 176 U | 0.000000 | 0.000000 | 172 C | 0.150000 | 0.061644 |
| 177 U | 0.306667 | 0.054365 | 173 G | 0.143333 | 0.030912 |
| 178 C | 0.126667 | 0.136951 | 174 C | 0.056667 | 0.020548 |
| 179 G | 0.240000 | 0.099331 | 175 G | 0.006667 | 0.004714 |
| 180 C | 0.053333 | 0.044969 | 176 U | 0.016667 | 0.012472 |
| 181 C | 0.083333 | 0.049216 | 177 U | 0.383333 | 0.074087 |
| 182 G | 0.346667 | 0.215458 | 178 C | 0.113333 | 0.004714 |
| 183 G | 0.380000 | 0.113431 | 179 G | 0.130000 | 0.058878 |
| 184 C | 0.130000 | 0.131403 | 180 C | 0.010000 | 0.014142 |
| 185 C | 0.190000 | 0.071181 | 181 C | 0.066667 | 0.062361 |
| 186 G | 0.090000 | 0.063770 | 182 G | 0.630000 | 0.080416 |
| 187 G | 0.653333 | 0.175942 | 183 G | 1.286667 | 0.162138 |
| 188 C | nd       | nd       | 184 C | 0.640000 | 0.115758 |
| 189 G | 0.196667 | 0.115566 | 185 C | 0.656667 | 0.193620 |
| 190 A | 0.000000 | 0.000000 | 186 G | 0.246667 | 0.175563 |
| 191 U | 0.363333 | 0.167796 | 187 G | 0.910000 | 0.160624 |
| 192 U | 1.540000 | 0.660353 | 188 C | nd       | nd       |
| 193 A | 0.266667 | 0.115854 | 189 G | 0.226667 | 0.320555 |
| 194 A | 0.086667 | 0.041899 | 190 A | 0.080000 | 0.061644 |
| 195 A | 0.103333 | 0.041899 | 191 U | 0.250000 | 0.134907 |
| 196 A | 0.123333 | 0.030912 | 192 U | 0.830000 | 0.129615 |
| 197 G | 0.090000 | 0.021602 | 193 A | 0.423333 | 0.130213 |
| 198 U | 0.160000 | 0.035590 | 194 A | 0.246667 | 0.038586 |
| 199 G | 0.180000 | 0.037417 | 195 A | 0.336667 | 0.095685 |
| 200 A | 0.233333 | 0.063421 | 196 A | 0.263333 | 0.125521 |
| 201 A | 0.316667 | 0.062361 | 197 G | 0.143333 | 0.041096 |
| 202 A | 0.320000 | 0.074833 | 198 U | 0.196667 | 0.073636 |
| 203 G | 0.626667 | 0.093927 | 199 G | 0.246667 | 0.016997 |
| 204 U | 2.413333 | 0.564053 | 200 A | 0.403333 | 0.004714 |
| 205 A | 0.726667 | 0.163571 | 201 A | 0.433333 | 0.004714 |
| 206 A | 0.350000 | 0.029439 | 202 A | 0.233333 | 0.032998 |
| 207 A | 0.110000 | 0.050990 | 203 G | 0.303333 | 0.046428 |
| 208 C | 0.196667 | 0.151950 | 204 U | 0.730000 | 0.071181 |
| 209 U | 0.023333 | 0.032998 | 205 A | 0.436667 | 0.074087 |
| 210 C | 0.000000 | 0.000000 | 206 A | 0.556667 | 0.074087 |
| 211 U | 0.083333 | 0.009428 | 207 A | 0.223333 | 0.060185 |
| 212 C | 0.183333 | 0.004714 | 208 C | 0.033333 | 0.028674 |
| 213 G | 0.143333 | 0.012472 | 209 U | 0.046667 | 0.018856 |
| 214 A | 0.356667 | 0.004714 | 210 C | 0.020000 | 0.021602 |
| 215 A | 0.400000 | 0.000000 | 211 U | 0.086667 | 0.073636 |
| 216 A | 0.470000 | 0.125698 | 212 C | 0.220000 | 0.057155 |
| 217 G | 1.343333 | 0.189795 | 213 G | 0.106667 | 0.009428 |
| 218 U | 6.223333 | 1.484505 | 214 A | 0.366667 | 0.024944 |

|       |          |          |       |          |          |
|-------|----------|----------|-------|----------|----------|
| 219 A | 1.236667 | 0.117851 | 215 A | 0.420000 | 0.037417 |
| 220 A | 0.496667 | 0.160485 | 216 A | 0.330000 | 0.050990 |
| 221 G | 0.480000 | 0.155563 | 217 G | 0.470000 | 0.108012 |
| 222 U | 0.690000 | 0.125698 | 218 U | 1.423333 | 0.075865 |
| 223 G | 0.226667 | 0.047140 | 219 A | 0.903333 | 0.131233 |
| 224 U | 0.520000 | 0.014142 | 220 A | 0.726667 | 0.189268 |
| 225 U | 0.336667 | 0.024944 | 221 G | 0.806667 | 0.224846 |
| 226 G | 0.003333 | 0.004714 | 222 U | 1.023333 | 0.324277 |
| 227 C | 0.000000 | 0.000000 | 223 G | 0.610000 | 0.369143 |
| 228 G | 0.200000 | 0.028284 | 224 U | 0.896667 | 0.183727 |
| 229 C | 0.000000 | 0.000000 | 225 U | 0.650000 | 0.061644 |
| 230 U | 0.250000 | 0.048990 | 226 G | 0.093333 | 0.069442 |
| 231 C | 0.053333 | 0.075425 | 227 C | 0.040000 | 0.056569 |
| 232 G | 0.496667 | 0.116142 | 228 G | 0.310000 | 0.066833 |
| 233 G | 0.640000 | 0.077889 | 229 C | 0.000000 | 0.000000 |
| 234 A | 1.833333 | 0.156276 | 230 U | 0.140000 | 0.069761 |
| 235 U | 2.333333 | 0.318991 | 231 C | 0.103333 | 0.074087 |
| 236 A | 0.540000 | 0.021602 | 232 G | 0.670000 | 0.028284 |
| 237 U | 0.360000 | 0.008165 | 233 G | 0.506667 | 0.055578 |
| 238 G | 0.080000 | 0.008165 | 234 A | 1.566667 | 0.310305 |
| 239 G | 0.026667 | 0.004714 | 235 U | 2.003333 | 0.158395 |
| 240 G | 0.000000 | 0.000000 | 236 A | 0.666667 | 0.118134 |
| 241 G | 0.006667 | 0.004714 | 237 U | 0.720000 | 0.106145 |
| 242 C | 0.033333 | 0.023570 | 238 G | 0.013333 | 0.004714 |
| 243 A | 0.056667 | 0.040277 | 239 G | 0.000000 | 0.000000 |
| 244 A | 0.020000 | 0.008165 | 240 G | 0.003333 | 0.004714 |
| 245 G | 0.123333 | 0.041899 | 241 G | 0.033333 | 0.047140 |
| 246 A | 0.606667 | 0.176320 | 242 C | 0.006667 | 0.009428 |
| 247 A | 0.920000 | 0.102307 | 243 A | 0.030000 | 0.042426 |
| 248 U | 1.750000 | 0.205426 | 244 A | 0.143333 | 0.024944 |
| 249 U | 3.996667 | 0.174611 | 245 G | 0.133333 | 0.030912 |
| 250 A | 2.330000 | 0.280832 | 246 A | 0.516667 | 0.038586 |
| 251 U | 2.013333 | 0.271457 | 247 A | 0.433333 | 0.028674 |
| 252 U | 2.943333 | 0.475908 | 248 U | 0.700000 | 0.092014 |
| 253 A | 1.610000 | 0.355622 | 249 U | 0.353333 | 0.040277 |
| 254 A | 1.203333 | 0.386810 | 250 A | 0.103333 | 0.020548 |
| 255 A | 0.673333 | 0.150849 | 251 A | 0.056667 | 0.030912 |
| 256 G | 0.056667 | 0.033993 | 252 G | 0.083333 | 0.061824 |
| 257 A | 0.030000 | 0.042426 | 253 C | 0.123333 | 0.033993 |
| 258 C | 0.086667 | 0.080554 | 254 C | 0.286667 | 0.073636 |
| 259 A | 0.006667 | 0.009428 | 255 A | 0.153333 | 0.036818 |
| 260 C | 0.010000 | 0.008165 | 256 G | 0.056667 | 0.080139 |
| 261 G | 0.013333 | 0.004714 | 257 C | 0.203333 | 0.044969 |
| 262 G | 0.026667 | 0.009428 | 258 A | 0.560000 | 0.072572 |
| 263 G | 0.020000 | 0.000000 | 259 U | 0.590000 | 0.112250 |
| 264 G | 0.090000 | 0.016330 | 260 G | 0.573333 | 0.040277 |
| 265 A | 0.113333 | 0.009428 | 261 A | 0.473333 | 0.028674 |
| 266 G | 0.150000 | 0.043205 | 262 A | 0.413333 | 0.065490 |

|       |          |          |       |          |          |
|-------|----------|----------|-------|----------|----------|
| 267 U | 0.906667 | 0.372767 | 263 C | 0.636667 | 0.253815 |
| 268 A | 0.176667 | 0.036818 | 264 G | 0.120000 | 0.021602 |
| 269 A | 0.090000 | 0.014142 | 265 U | 0.363333 | 0.004714 |
| 270 A | 0.106667 | 0.024944 | 266 U | 0.700000 | 0.037417 |
| 271 G | 0.033333 | 0.016997 | 267 A | 1.713333 | 0.161107 |
| 272 G | 0.053333 | 0.037712 | 268 U | 0.710000 | 0.085245 |
| 273 U | 0.380000 | 0.128323 | 269 G | 1.886667 | 0.098432 |
| 274 U | 1.986667 | 0.691343 | 270 U | 2.190000 | 0.085245 |
| 275 A | 0.606667 | 0.132246 | 271 A | 3.150000 | 0.203142 |
| 276 A | 0.316667 | 0.075425 | 272 G | 1.616667 | 0.142906 |
| 277 A | 0.360000 | 0.112250 | 273 A | 0.703333 | 0.066500 |
| 278 U | 1.226667 | 0.536677 | 274 A | 0.320000 | 0.157692 |
| 279 A | 0.110000 | 0.057155 | 275 C | 0.530000 | 0.077889 |
| 280 U | 0.143333 | 0.044969 | 276 A | 0.620000 | 0.053541 |
| 281 G | 0.206667 | 0.063421 | 277 A | 0.420000 | 0.045461 |
| 282 C | 0.010000 | 0.014142 | 278 U | 0.780000 | 0.021602 |
| 283 U | 0.000000 | 0.000000 | 279 U | 1.020000 | 0.053541 |
| 284 G | 0.060000 | 0.043205 | 280 G | 0.850000 | 0.045461 |
| 285 A | 0.080000 | 0.071181 | 281 A | 0.906667 | 0.131993 |
| 286 U | 0.070000 | 0.045461 | 282 A | 0.563333 | 0.071336 |
| 287 C | 0.000000 | 0.000000 | 283 G | 0.003333 | 0.004714 |
| 288 U | 0.000000 | 0.000000 | 284 C | 0.000000 | 0.000000 |
| 289 U | 0.050000 | 0.021602 | 285 A | 0.083333 | 0.062361 |
| 290 U | 0.106667 | 0.004714 | 286 G | 0.003333 | 0.004714 |
| 291 U | 0.103333 | 0.075865 | 287 G | 0.000000 | 0.000000 |
| 292 G | 0.033333 | 0.047140 | 288 C | 0.000000 | 0.000000 |
| 293 A | 0.230000 | 0.021602 | 289 U | 0.016667 | 0.023570 |
| 294 A | 0.040000 | 0.043205 | 290 U | 0.526667 | 0.131993 |
| 295 A | 0.000000 | 0.000000 | 291 U | 0.773333 | 0.190146 |
| 296 U | 0.000000 | 0.000000 | 292 A | 1.550000 | 0.045461 |
| 297 U | 0.000000 | 0.000000 | 293 A | 1.540000 | 0.117757 |
| 298 U | 0.066667 | 0.062361 | 294 A | 1.200000 | 0.126754 |
| 299 U | 0.136667 | 0.087305 | 295 G | 0.116667 | 0.068475 |
| 300 U | 0.106667 | 0.079303 | 296 A | 0.036667 | 0.051854 |
| 301 U | 0.270000 | 0.114310 | 297 C | 0.000000 | 0.000000 |
| 302 G | 0.213333 | 0.024944 | 298 A | 0.000000 | 0.000000 |
| 303 A | 0.223333 | 0.127628 | 299 C | 0.076667 | 0.016997 |
| 304 U | 0.133333 | 0.016997 | 300 G | 0.110000 | 0.021602 |
| 305 U | 0.066667 | 0.012472 | 301 G | 0.153333 | 0.054365 |
| 306 U | 0.123333 | 0.004714 | 302 G | 0.023333 | 0.026247 |
| 307 U | 0.166667 | 0.004714 | 303 G | 0.053333 | 0.041899 |
| 308 G | 0.056667 | 0.004714 | 304 A | 0.023333 | 0.026247 |
| 309 U | 0.176667 | 0.012472 | 305 G | 0.073333 | 0.040277 |
| 310 G | 0.116667 | 0.016997 | 306 U | 0.233333 | 0.168193 |
| 311 A | 0.093333 | 0.012472 | 307 A | 0.350000 | 0.037417 |
| 312 A | 0.083333 | 0.069442 | 308 A | 0.136667 | 0.114407 |
| 313 G | 0.286667 | 0.091773 | 309 A | 0.220000 | 0.073485 |
| 314 G | 0.570000 | 0.123288 | 310 G | 0.233333 | 0.137679 |



|       |          |          |       |          |          |
|-------|----------|----------|-------|----------|----------|
| 315 A | 1.720000 | 0.377094 | 311 G | 0.063333 | 0.044969 |
| 316 U | 3.306667 | 0.387327 | 312 U | 0.513333 | 0.203688 |
| 317 A | 0.920000 | 0.024495 | 313 U | 1.483333 | 0.249444 |
| 318 C | 0.076667 | 0.057927 | 314 A | 1.063333 | 0.098093 |
| 319 U | 0.420000 | 0.071181 | 315 A | 0.876667 | 0.041096 |
| 320 U | 0.476667 | 0.122565 | 316 A | 0.943333 | 0.103387 |
| 321 G | 0.040000 | 0.021602 | 317 U | 0.420000 | 0.029439 |
| 322 U | 0.080000 | 0.029439 | 318 A | 0.596667 | 0.059067 |
| 323 C | 0.000000 | 0.000000 | 319 U | 0.660000 | 0.045461 |
| 324 C | 0.000000 | 0.000000 | 320 G | 0.110000 | 0.008165 |
| 325 U | 0.000000 | 0.000000 | 321 C | 0.000000 | 0.000000 |
| 326 U | 0.053333 | 0.037712 | 322 U | 0.140000 | 0.099331 |
| 327 G | 0.003333 | 0.004714 | 323 G | 0.240000 | 0.160831 |
| 328 G | 0.030000 | 0.042426 | 324 A | 0.660000 | 0.152534 |
| 329 U | 0.010000 | 0.008165 | 325 U | 0.566667 | 0.344996 |
| 330 U | 0.033333 | 0.009428 | 326 A | 2.606667 | 0.225290 |
| 331 U | 0.020000 | 0.000000 | 327 C | 0.046667 | 0.065997 |
| 332 C | 0.186667 | 0.055578 | 328 U | 0.190000 | 0.106771 |
| 333 C | 0.726667 | 0.138163 | 329 U | 0.256667 | 0.057927 |
| 334 G | 2.873333 | 0.762292 | 330 G | 0.110000 | 0.000000 |
| 335 C | 5.556667 | 0.530807 | 331 U | 0.063333 | 0.030912 |
| 336 A | 3.680000 | 1.061163 | 332 C | 0.000000 | 0.000000 |
| 337 A | 1.130000 | 0.499266 | 333 C | 0.000000 | 0.000000 |
| 338 G | 0.790000 | 0.172047 | 334 U | 0.000000 | 0.000000 |
| 339 A | 0.680000 | 0.249933 | 335 U | 0.010000 | 0.008165 |
| 340 G | 0.256667 | 0.355934 | 336 G | 0.000000 | 0.000000 |
| 341 G | 0.000000 | 0.000000 | 337 G | 0.010000 | 0.014142 |
| 342 G | 0.006667 | 0.009428 | 338 U | 0.006667 | 0.009428 |
| 343 A | 0.000000 | 0.000000 | 339 U | 0.070000 | 0.049666 |
| 344 A | 0.000000 | 0.000000 | 340 U | 0.026667 | 0.020548 |
| 345 C | 0.036667 | 0.051854 | 341 C | 0.013333 | 0.018856 |
| 346 C | 0.010000 | 0.014142 | 342 C | 0.636667 | 0.038586 |
| 347 A | 0.550000 | 0.117757 | 343 G | 1.346667 | 0.450876 |
| 348 U | 2.893333 | 0.890031 | 344 C | 3.180000 | 0.607124 |
| 349 A | 0.186667 | 0.078457 | 345 A | 7.163333 | 0.672028 |
| 350 G | 0.063333 | 0.046428 | 346 A | 2.570000 | 0.311555 |
| 351 A | 0.570000 | 0.410853 | 347 G | 2.186667 | 0.428978 |
| 352 U | 4.026667 | 0.607417 | 348 A | 2.313333 | 0.420819 |
| 353 A | 1.110000 | 0.197990 | 349 G | 0.153333 | 0.113235 |
| 354 U | 1.266667 | 0.232713 | 350 G | 0.030000 | 0.021602 |
| 355 U | 2.536667 | 0.471475 | 351 G | 0.000000 | 0.000000 |
| 356 A | 0.826667 | 0.244177 | 352 A | 0.000000 | 0.000000 |
| 357 A | 0.310000 | 0.078740 | 353 A | 0.003333 | 0.004714 |
| 358 A | 0.226667 | 0.044969 | 354 C | 0.000000 | 0.000000 |
| 359 C | 0.103333 | 0.024944 | 355 C | 0.000000 | 0.000000 |
| 360 G | 0.006667 | 0.009428 | 356 A | 0.000000 | 0.000000 |
| 361 G | 0.000000 | 0.000000 | 357 U | 0.770000 | 0.322594 |
| 362 U | 0.246667 | 0.038586 | 358 A | 0.443333 | 0.004714 |

|       |          |          |       |          |          |
|-------|----------|----------|-------|----------|----------|
| 363 G | 0.070000 | 0.040825 | 359 G | 0.000000 | 0.000000 |
| 364 G | 0.030000 | 0.035590 | 360 A | 0.120000 | 0.148997 |
| 365 C | 0.440000 | 0.278568 | 361 U | 0.350000 | 0.223756 |
| 366 G | 1.103333 | 0.136707 | 362 A | 0.843333 | 0.150849 |
| 367 U | 3.150000 | 0.306268 | 363 U | 0.686667 | 0.176131 |
|       |          |          | 364 U | 0.000000 | 0.000000 |
|       |          |          | 365 A | 0.606667 | 0.136951 |
|       |          |          | 366 A | 0.410000 | 0.048990 |
|       |          |          | 367 A | 0.586667 | 0.041096 |
|       |          |          | 368 C | 0.340000 | 0.057155 |
|       |          |          | 369 G | 0.000000 | 0.000000 |
|       |          |          | 370 G | 0.000000 | 0.000000 |
|       |          |          | 371 U | 0.133333 | 0.071336 |
|       |          |          | 372 G | 0.010000 | 0.014142 |
|       |          |          | 373 G | 0.183333 | 0.259272 |
|       |          |          | 374 C | 0.476667 | 0.285463 |
|       |          |          | 375 G | 0.780000 | 0.455851 |
|       |          |          | 376 U | 1.213333 | 0.273537 |
|       |          |          | 377 A | 1.046667 | 0.085765 |
|       |          |          | 378 G | 1.460000 | 0.430426 |

**RK20**

| seqNum | seqRNA | Mean value | Standard dev. |
|--------|--------|------------|---------------|
| 11     | A      | 0.460000   | 0.000000      |
| 12     | A      | 0.520000   | 0.000000      |
| 13     | U      | 0.540000   | 0.097980      |
| 14     | G      | 0.600000   | 0.021602      |
| 15     | A      | 0.383333   | 0.368088      |
| 16     | G      | 0.030000   | 0.021602      |
| 17     | A      | 0.120000   | 0.169706      |
| 18     | C      | 0.126667   | 0.087305      |
| 19     | U      | 0.070000   | 0.029439      |
| 20     | U      | 0.100000   | 0.053541      |
| 21     | G      | 0.193333   | 0.118977      |
| 22     | A      | 0.940000   | 0.069761      |
| 23     | U      | 2.043333   | 0.286395      |
| 24     | C      | 0.226667   | 0.106249      |
| 25     | A      | 0.003333   | 0.004714      |
| 26     | G      | 0.546667   | 0.063421      |
| 27     | A      | 2.136667   | 0.193620      |
| 28     | A      | 2.873333   | 0.241431      |
| 29     | C      | 1.603333   | 0.362338      |
| 30     | A      | 2.396667   | 0.234710      |
| 31     | C      | 0.313333   | 0.208859      |
| 32     | U      | 0.183333   | 0.134743      |
| 33     | G      | 0.056667   | 0.054365      |
| 34     | U      | 0.000000   | 0.000000      |
| 35     | C      | 0.076667   | 0.108423      |
| 36     | U      | 0.000000   | 0.000000      |
| 37     | U      | 0.133333   | 0.020548      |
| 38     | G      | 0.436667   | 0.033993      |
| 39     | U      | 0.016667   | 0.023570      |
| 40     | C      | 0.096667   | 0.086538      |
| 41     | U      | 0.016667   | 0.023570      |
| 42     | C      | 0.343333   | 0.319826      |
| 43     | C      | 0.460000   | 0.151217      |
| 44     | A      | 0.280000   | 0.308653      |
| 45     | U      | 0.773333   | 0.143372      |
| 46     | U      | 0.830000   | 0.101980      |
| 47     | U      | 0.626667   | 0.055578      |
| 48     | C      | 0.130000   | 0.029439      |
| 49     | U      | 0.346667   | 0.009428      |
| 50     | U      | 0.660000   | 0.049666      |
| 51     | G      | 0.000000   | 0.000000      |
| 52     | U      | 0.010000   | 0.014142      |
| 53     | G      | 0.010000   | 0.014142      |
| 54     | U      | 0.020000   | 0.016330      |
| 55     | C      | 0.010000   | 0.014142      |
| 56     | U      | 0.023333   | 0.032998      |

**RK21**

| seqNum | seqRNA | Mean value | Standard dev. |
|--------|--------|------------|---------------|
| 11     | A      | 0.586667   | 0.069442      |
| 12     | A      | 0.753333   | 0.030912      |
| 13     | U      | 0.530000   | 0.058878      |
| 14     | G      | 0.046667   | 0.065997      |
| 15     | A      | 0.000000   | 0.000000      |
| 16     | G      | 0.023333   | 0.032998      |
| 17     | A      | 0.023333   | 0.032998      |
| 18     | C      | 0.076667   | 0.070396      |
| 19     | U      | 0.046667   | 0.033993      |
| 20     | U      | 0.080000   | 0.043205      |
| 21     | G      | 0.190000   | 0.074833      |
| 22     | A      | 0.796667   | 0.097411      |
| 23     | U      | 1.583333   | 0.285463      |
| 24     | C      | 0.270000   | 0.008165      |
| 25     | A      | 0.163333   | 0.054365      |
| 26     | G      | 0.410000   | 0.144453      |
| 27     | A      | 1.270000   | 0.235372      |
| 28     | A      | 1.486667   | 0.297695      |
| 29     | C      | 0.873333   | 0.060185      |
| 30     | A      | 1.596667   | 0.273537      |
| 31     | C      | 0.100000   | 0.070711      |
| 32     | U      | 0.040000   | 0.024495      |
| 33     | G      | 0.000000   | 0.000000      |
| 34     | U      | 0.000000   | 0.000000      |
| 35     | C      | 0.043333   | 0.047842      |
| 36     | U      | 0.000000   | 0.000000      |
| 37     | U      | 0.006667   | 0.009428      |
| 38     | G      | 0.000000   | 0.000000      |
| 39     | U      | 0.000000   | 0.000000      |
| 40     | C      | 0.040000   | 0.032660      |
| 41     | U      | 0.080000   | 0.069761      |
| 42     | C      | 1.053333   | 0.230988      |
| 43     | C      | 1.556667   | 0.233000      |
| 44     | A      | 0.310000   | 0.029439      |
| 45     | U      | 0.383333   | 0.075865      |
| 46     | U      | 0.123333   | 0.057927      |
| 47     | U      | 0.150000   | 0.043205      |
| 48     | C      | 0.033333   | 0.028674      |
| 49     | U      | 0.016667   | 0.023570      |
| 50     | U      | 0.073333   | 0.026247      |
| 51     | G      | 0.003333   | 0.004714      |
| 52     | U      | 0.043333   | 0.018856      |
| 53     | G      | 0.016667   | 0.004714      |
| 54     | U      | 0.020000   | 0.014142      |
| 55     | C      | 0.006667   | 0.009428      |
| 56     | U      | 0.113333   | 0.082192      |

|       |          |          |       |          |          |
|-------|----------|----------|-------|----------|----------|
| 57 C  | 0.000000 | 0.000000 | 57 C  | 0.030000 | 0.021602 |
| 58 U  | 0.000000 | 0.000000 | 58 U  | 0.113333 | 0.090308 |
| 59 U  | 0.106667 | 0.089938 | 59 U  | 0.180000 | 0.021602 |
| 60 G  | 0.463333 | 0.089567 | 60 G  | 0.253333 | 0.012472 |
| 61 U  | 0.170000 | 0.024495 | 61 U  | 0.153333 | 0.028674 |
| 62 U  | 1.740000 | 0.264197 | 62 U  | 1.086667 | 0.038586 |
| 63 C  | 0.000000 | 0.000000 | 63 C  | 0.170000 | 0.085245 |
| 64 C  | 0.000000 | 0.000000 | 64 C  | 0.126667 | 0.091043 |
| 65 C  | 0.000000 | 0.000000 | 65 C  | 0.000000 | 0.000000 |
| 66 U  | 0.000000 | 0.000000 | 66 U  | 0.326667 | 0.087305 |
| 67 U  | 0.000000 | 0.000000 | 67 U  | 1.880000 | 0.631559 |
| 68 C  | 0.000000 | 0.000000 | 68 C  | 7.420000 | 2.165749 |
| 69 A  | 0.000000 | 0.000000 | 69 A  | 0.993333 | 0.153261 |
| 70 A  | 0.440000 | 0.622254 | 70 A  | 0.896667 | 0.097411 |
| 71 U  | 0.106667 | 0.150849 | 71 U  | 0.183333 | 0.041096 |
| 72 U  | 0.030000 | 0.021602 | 72 U  | 0.053333 | 0.004714 |
| 73 C  | 0.090000 | 0.082865 | 73 C  | 0.000000 | 0.000000 |
| 74 C  | 0.023333 | 0.032998 | 74 C  | 0.000000 | 0.000000 |
| 75 C  | 0.000000 | 0.000000 | 75 C  | 0.533333 | 0.023570 |
| 76 A  | 0.073333 | 0.009428 | 76 A  | 0.120000 | 0.014142 |
| 77 C  | 0.106667 | 0.067987 | 77 C  | 0.056667 | 0.012472 |
| 78 U  | 0.093333 | 0.009428 | 78 U  | 0.063333 | 0.009428 |
| 79 C  | 0.053333 | 0.049889 | 79 C  | 0.003333 | 0.004714 |
| 80 C  | 0.013333 | 0.018856 | 80 C  | 0.000000 | 0.000000 |
| 81 C  | 0.066667 | 0.047842 | 81 C  | 0.003333 | 0.004714 |
| 82 U  | 0.003333 | 0.004714 | 82 U  | 0.000000 | 0.000000 |
| 83 C  | 0.106667 | 0.028674 | 83 C  | 0.033333 | 0.012472 |
| 84 C  | 0.076667 | 0.054365 | 84 C  | 0.033333 | 0.016997 |
| 85 U  | 0.013333 | 0.018856 | 85 U  | 0.046667 | 0.004714 |
| 86 C  | 0.000000 | 0.000000 | 86 C  | 0.003333 | 0.004714 |
| 87 C  | 0.000000 | 0.000000 | 87 C  | 0.063333 | 0.024944 |
| 88 A  | 0.060000 | 0.084853 | 88 A  | 0.126667 | 0.057349 |
| 89 G  | 0.980000 | 0.045461 | 89 G  | 0.643333 | 0.125521 |
| 90 G  | 0.900000 | 0.045461 | 90 G  | 0.613333 | 0.030912 |
| 91 U  | 1.816667 | 0.196016 | 91 U  | 1.196667 | 0.131993 |
| 92 U  | 1.923333 | 0.108730 | 92 U  | 1.053333 | 0.080554 |
| 93 C  | 0.240000 | 0.057155 | 93 C  | 0.113333 | 0.033993 |
| 94 C  | 0.030000 | 0.042426 | 94 C  | 0.000000 | 0.000000 |
| 95 U  | 0.000000 | 0.000000 | 95 U  | 0.050000 | 0.028284 |
| 96 A  | 0.070000 | 0.021602 | 96 A  | 0.040000 | 0.024495 |
| 97 C  | 0.236667 | 0.062361 | 97 C  | 0.163333 | 0.004714 |
| 98 U  | 2.436667 | 0.102089 | 98 U  | 1.530000 | 0.063770 |
| 99 G  | 0.173333 | 0.057927 | 99 G  | 0.196667 | 0.033993 |
| 100 U | 0.016667 | 0.023570 | 100 U | 0.126667 | 0.020548 |
| 101 U | 0.440000 | 0.113137 | 101 U | 0.516667 | 0.139603 |
| 102 G | 0.303333 | 0.139603 | 102 G | 0.533333 | 0.110252 |
| 103 A | 1.250000 | 0.276526 | 103 A | 1.033333 | 0.028674 |
| 104 U | 0.273333 | 0.032998 | 104 U | 0.170000 | 0.053541 |

|     |   |          |          |     |   |          |          |
|-----|---|----------|----------|-----|---|----------|----------|
| 105 | C | 0.103333 | 0.063421 | 105 | C | 0.050000 | 0.045461 |
| 106 | C | 0.000000 | 0.000000 | 106 | C | 0.006667 | 0.004714 |
| 107 | C | 0.000000 | 0.000000 | 107 | C | 0.000000 | 0.000000 |
| 108 | G | 0.233333 | 0.047140 | 108 | G | 0.066667 | 0.012472 |
| 109 | C | 0.700000 | 0.216487 | 109 | C | 0.490000 | 0.134907 |
| 110 | G | 3.353333 | 0.296910 | 110 | G | 2.110000 | 0.236220 |
| 111 | G | 2.033333 | 0.053125 | 111 | G | 1.176667 | 0.065997 |
| 112 | G | 0.656667 | 0.026247 | 112 | G | 0.503333 | 0.067987 |
| 113 | U | 2.343333 | 0.032998 | 113 | U | 1.596667 | 0.110855 |
| 114 | C | 0.083333 | 0.051854 | 114 | C | 0.053333 | 0.036818 |
| 115 | G | 0.025000 | 0.020412 | 115 | G | 0.000000 | 0.000000 |
| 116 | G | 0.000000 | 0.000000 | 116 | G | 0.000000 | 0.000000 |
| 117 | G | 0.000000 | 0.000000 | 117 | G | 0.000000 | 0.000000 |
| 118 | A | 0.000000 | 0.000000 | 118 | A | 0.016667 | 0.023570 |
| 119 | C | 0.000000 | 0.000000 | 119 | C | 0.533333 | 0.381430 |
| 120 | A | 1.850000 | 0.155134 | 120 | A | 0.923333 | 0.130979 |
| 121 | G | 0.720000 | 0.040825 | 121 | G | 0.433333 | 0.198718 |
| 122 | U | 1.115000 | 0.102062 | 122 | U | 0.563333 | 0.121198 |
| 123 | U | 0.983333 | 0.065490 | 123 | U | 0.640000 | 0.222261 |
| 124 | G | 0.070000 | 0.037417 | 124 | G | 0.116667 | 0.079303 |
| 125 | G | 0.060000 | 0.084853 | 125 | G | 0.023333 | 0.032998 |
| 126 | C | 0.100000 | 0.061644 | 126 | C | 0.116667 | 0.097411 |
| 127 | G | 0.163333 | 0.126579 | 127 | G | 0.016667 | 0.023570 |
| 128 | C | 0.000000 | 0.000000 | 128 | C | 0.090000 | 0.127279 |
| 129 | C | 0.000000 | 0.000000 | 129 | C | 0.000000 | 0.000000 |
| 130 | C | 0.000000 | 0.000000 | 130 | C | 0.000000 | 0.000000 |
| 131 | A | 0.020000 | 0.028284 | 131 | A | 0.000000 | 0.000000 |
| 132 | A | 0.243333 | 0.182635 | 132 | A | 0.013333 | 0.018856 |
| 133 | C | 0.013333 | 0.018856 | 133 | C | 0.026667 | 0.020548 |
| 134 | G | 0.013333 | 0.018856 | 134 | G | 0.043333 | 0.061283 |
| 135 | U | 0.006667 | 0.009428 | 135 | U | 0.013333 | 0.018856 |
| 136 | G | 0.003333 | 0.004714 | 136 | G | 0.080000 | 0.037417 |
| 137 | G | 0.076667 | 0.108423 | 137 | G | 0.046667 | 0.065997 |
| 138 | G | 0.000000 | 0.000000 | 138 | G | 0.000000 | 0.000000 |
| 139 | G | 0.000000 | 0.000000 | 139 | G | 0.000000 | 0.000000 |
| 140 | C | 0.000000 | 0.000000 | 140 | C | 0.000000 | 0.000000 |
| 141 | U | 0.000000 | 0.000000 | 141 | U | 0.000000 | 0.000000 |
| 142 | G | 0.093333 | 0.067987 | 142 | G | 0.000000 | 0.000000 |
| 143 | G | 0.003333 | 0.004714 | 143 | G | 0.000000 | 0.000000 |
| 144 | A | 0.083333 | 0.117851 | 144 | A | 0.070000 | 0.085245 |
| 145 | U | 0.416667 | 0.167597 | 145 | U | 0.330000 | 0.088318 |
| 146 | A | 1.196667 | 0.030912 | 146 | A | 0.730000 | 0.130639 |
| 147 | C | 0.160000 | 0.077889 | 147 | C | 0.203333 | 0.075865 |
| 148 | G | 0.000000 | 0.000000 | 148 | G | 0.000000 | 0.000000 |
| 149 | A | 0.060000 | 0.084853 | 149 | A | 0.000000 | 0.000000 |
| 150 | G | nd       | nd       | 150 | G | 0.000000 | 0.000000 |
| 151 | G | nd       | nd       | 151 | G | 0.000000 | 0.000000 |
| 152 | G | nd       | nd       | 152 | G | 0.000000 | 0.000000 |

|       |          |          |       |          |          |
|-------|----------|----------|-------|----------|----------|
| 153 A | nd       | nd       | 153 A | 0.000000 | 0.000000 |
| 154 A | 1.373333 | 0.456971 | 154 A | 0.950000 | 0.318434 |
| 155 U | 1.970000 | 0.220454 | 155 U | 1.146667 | 0.187320 |
| 156 U | 1.416667 | 0.308257 | 156 U | 0.693333 | 0.159652 |
| 157 U | 1.516667 | 0.365726 | 157 U | 1.240000 | 0.227303 |
| 158 C | 0.100000 | 0.086023 | 158 C | 0.096667 | 0.032998 |
| 159 G | 0.073333 | 0.052493 | 159 G | 0.076667 | 0.004714 |
| 160 U | 0.130000 | 0.021602 | 160 U | 0.140000 | 0.008165 |
| 161 G | 0.286667 | 0.106562 | 161 G | 0.126667 | 0.023570 |
| 162 A | 2.703333 | 0.867384 | 162 A | 1.360000 | 0.467832 |
| 163 G | 0.083333 | 0.065490 | 163 G | 0.133333 | 0.110252 |
| 164 G | 0.003333 | 0.004714 | 164 G | 0.093333 | 0.004714 |
| 165 A | 0.023333 | 0.032998 | 165 A | 0.016667 | 0.023570 |
| 166 A | 0.283333 | 0.065490 | 166 A | 0.113333 | 0.089938 |
| 167 G | 0.233333 | 0.049889 | 167 G | 0.070000 | 0.061644 |
| 168 A | 0.903333 | 0.233286 | 168 A | 0.456667 | 0.135236 |
| 169 C | 0.026667 | 0.037712 | 169 C | 0.323333 | 0.111455 |
| 170 G | 0.070000 | 0.035590 | 170 G | 0.016667 | 0.016997 |
| 171 A | 0.545000 | 0.053072 | 171 A | 0.183333 | 0.069442 |
| 172 C | 0.210000 | 0.122474 | 172 C | 0.416667 | 0.080554 |
| 173 G | 0.185000 | 0.004082 | 173 G | 0.056667 | 0.028674 |
| 174 C | 0.220000 | 0.040825 | 174 C | 0.113333 | 0.026247 |
| 175 G | 0.120000 | 0.097980 | 175 G | 0.276667 | 0.104987 |
| 176 U | 0.055000 | 0.044907 | 176 U | 0.060000 | 0.042426 |
| 177 U | 0.320000 | 0.048990 | 177 U | 0.190000 | 0.063770 |
| 178 C | 0.020000 | 0.016330 | 178 C | 0.020000 | 0.028284 |
| 179 G | 0.065000 | 0.053072 | 179 G | 0.163333 | 0.033993 |
| 180 C | 0.115000 | 0.093897 | 180 C | 0.143333 | 0.114407 |
| 181 C | 0.000000 | 0.000000 | 181 C | 0.036667 | 0.051854 |
| 182 G | 0.500000 | 0.163299 | 182 G | 0.233333 | 0.055578 |
| 183 G | 0.800000 | 0.228619 | 183 G | 0.240000 | 0.170489 |
| 184 C | 0.115000 | 0.093897 | 184 C | 0.096667 | 0.069442 |
| 185 C | 0.305000 | 0.028577 | 185 C | 0.146667 | 0.009428 |
| 186 G | 0.145000 | 0.118392 | 186 G | 0.010000 | 0.014142 |
| 187 G | 0.255000 | 0.142887 | 187 G | 0.000000 | 0.000000 |
| 188 C | 0.360000 | 0.293939 | 188 C | 0.000000 | 0.000000 |
| 189 G | 0.105000 | 0.085732 | 189 G | 0.606667 | 0.367091 |
| 190 A | 0.130000 | 0.106145 | 190 A | 0.166667 | 0.117851 |
| 191 U | 0.215000 | 0.142887 | 191 U | 0.510000 | 0.106771 |
| 192 U | 0.620000 | 0.171464 | 192 U | 2.343333 | 0.344996 |
| 193 A | 0.440000 | 0.073485 | 193 A | 0.503333 | 0.113235 |
| 194 A | 0.270000 | 0.146969 | 194 A | 0.303333 | 0.106249 |
| 195 A | 0.190000 | 0.081650 | 195 A | 0.150000 | 0.131403 |
| 196 A | 0.150000 | 0.008165 | 196 A | 0.070000 | 0.092014 |
| 197 G | 0.475000 | 0.061237 | 197 G | 0.320000 | 0.035590 |
| 198 U | 0.500000 | 0.016330 | 198 U | 0.486667 | 0.037712 |
| 199 G | 0.855000 | 0.004082 | 199 G | 0.540000 | 0.066833 |
| 200 A | 0.895000 | 0.028577 | 200 A | 0.563333 | 0.033993 |

|       |          |          |       |          |          |
|-------|----------|----------|-------|----------|----------|
| 201 A | 0.855000 | 0.036742 | 201 A | 0.480000 | 0.024495 |
| 202 A | 0.900000 | 0.032660 | 202 A | 0.566667 | 0.073182 |
| 203 G | 1.250000 | 0.146969 | 203 G | 1.190000 | 0.134907 |
| 204 U | 0.975000 | 0.502145 | 204 U | 3.876667 | 0.160278 |
| 205 A | 0.940000 | 0.106145 | 205 A | 1.253333 | 0.150849 |
| 206 A | 0.970000 | 0.097980 | 206 A | 1.123333 | 0.099778 |
| 207 A | 0.125000 | 0.102062 | 207 A | 0.250000 | 0.184572 |
| 208 C | 0.000000 | 0.000000 | 208 C | 0.310000 | 0.280832 |
| 209 U | 0.140000 | 0.073485 | 209 U | 0.096667 | 0.069442 |
| 210 C | 0.055000 | 0.004082 | 210 C | 0.183333 | 0.167597 |
| 211 U | 0.280000 | 0.032660 | 211 U | 0.080000 | 0.057155 |
| 212 C | 0.185000 | 0.036742 | 212 C | 0.140000 | 0.099331 |
| 213 U | 0.465000 | 0.126557 | 213 U | 0.076667 | 0.108423 |
| 214 U | 0.870000 | 0.114310 | 214 U | 0.320000 | 0.057155 |
| 215 G | 0.900000 | 0.032660 | 215 G | 0.323333 | 0.055578 |
| 216 G | 0.375000 | 0.134722 | 216 G | 0.163333 | 0.155849 |
| 217 C | 0.225000 | 0.183712 | 217 C | 0.186667 | 0.147271 |
| 218 C | 0.230000 | 0.065320 | 218 C | 0.070000 | 0.048990 |
| 219 G | 0.215000 | 0.044907 | 219 G | 0.086667 | 0.057927 |
| 220 C | 0.000000 | 0.000000 | 220 C | 0.226667 | 0.159234 |
| 221 C | 0.045000 | 0.036742 | 221 C | 0.086667 | 0.069442 |
| 222 G | 0.060000 | 0.040825 | 222 G | 0.086667 | 0.040277 |
| 223 C | 0.005000 | 0.004082 | 223 C | 0.120000 | 0.073485 |
| 224 G | 0.035000 | 0.028577 | 224 G | 0.000000 | 0.000000 |
| 225 G | 0.145000 | 0.077567 | 225 G | 0.003333 | 0.004714 |
| 226 G | 1.200000 | 0.000000 | 226 G | 0.310000 | 0.247790 |
| 227 A | 3.610000 | 0.089815 | 227 A | 1.410000 | 0.488057 |
| 228 A | 2.260000 | 0.244949 | 228 A | 1.103333 | 0.174420 |
| 229 C | 0.650000 | 0.481733 | 229 C | 0.720000 | 0.243447 |
| 230 C | 0.550000 | 0.449073 | 230 C | 1.336667 | 0.181169 |
| 231 U | 2.345000 | 0.012247 | 231 U | 1.660000 | 0.147196 |
| 232 G | 1.435000 | 0.020412 | 232 G | 1.070000 | 0.029439 |
| 233 C | 0.145000 | 0.118392 | 233 C | 0.473333 | 0.126579 |
| 234 C | 0.000000 | 0.000000 | 234 C | 0.210000 | 0.193046 |
| 235 G | 0.020000 | 0.008165 | 235 G | 0.010000 | 0.014142 |
| 236 C | 0.000000 | 0.000000 | 236 C | 0.053333 | 0.075425 |
| 237 G | 0.145000 | 0.077567 | 237 G | 0.026667 | 0.024944 |
| 238 U | 0.335000 | 0.036742 | 238 U | 0.023333 | 0.032998 |
| 239 U | 0.460000 | 0.016330 | 239 U | 0.136667 | 0.041899 |
| 240 G | 0.355000 | 0.012247 | 240 G | 0.096667 | 0.030912 |
| 241 G | 0.550000 | 0.057155 | 241 G | 0.330000 | 0.024495 |
| 242 A | 2.370000 | 0.302104 | 242 A | 1.790000 | 0.184572 |
| 243 C | 0.155000 | 0.020412 | 243 C | 0.346667 | 0.089567 |
| 244 C | 0.005000 | 0.004082 | 244 C | 0.300000 | 0.092014 |
| 245 U | 0.130000 | 0.048990 | 245 U | 0.153333 | 0.059067 |
| 246 G | 0.120000 | 0.048990 | 246 G | 0.066667 | 0.016997 |
| 247 A | 0.195000 | 0.036742 | 247 A | 0.086667 | 0.009428 |
| 248 A | 0.235000 | 0.069402 | 248 A | 0.433333 | 0.067987 |

|       |          |          |       |          |          |
|-------|----------|----------|-------|----------|----------|
| 249 A | 0.045000 | 0.004082 | 249 A | 3.703333 | 0.669046 |
| 250 G | 0.050000 | 0.040825 | 250 G | 5.126667 | 0.203361 |
| 251 U | 0.285000 | 0.232702 | 251 U | 1.943333 | 0.118977 |
| 252 A | 0.860000 | 0.057155 | 252 A | 0.996667 | 0.063421 |
| 253 A | 0.845000 | 0.110227 | 253 A | 0.526667 | 0.110855 |
| 254 G | 1.260000 | 0.228619 | 254 G | 0.420000 | 0.037417 |
| 255 U | 1.550000 | 0.236784 | 255 U | 0.620000 | 0.037417 |
| 256 G | 0.735000 | 0.085732 | 256 G | 0.263333 | 0.020548 |
| 257 U | 1.335000 | 0.085732 | 257 U | 0.420000 | 0.117757 |
| 258 U | 0.875000 | 0.028577 | 258 U | 0.280000 | 0.099331 |
| 259 G | 0.060000 | 0.000000 | 259 G | 0.013333 | 0.018856 |
| 260 C | 0.000000 | 0.000000 | 260 C | 0.090000 | 0.016330 |
| 261 G | 0.305000 | 0.077567 | 261 G | 0.103333 | 0.004714 |
| 262 C | 0.000000 | 0.000000 | 262 C | 0.023333 | 0.032998 |
| 263 U | 0.170000 | 0.138804 | 263 U | 0.000000 | 0.000000 |
| 264 C | 0.315000 | 0.257196 | 264 C | 0.423333 | 0.095336 |
| 265 G | 0.785000 | 0.151052 | 265 G | 0.293333 | 0.049889 |
| 266 G | 0.655000 | 0.289856 | 266 G | 0.330000 | 0.089815 |
| 267 A | 1.600000 | 0.228619 | 267 A | 1.320000 | 0.058878 |
| 268 U | 0.815000 | 0.665445 | 268 U | 2.440000 | 0.243858 |
| 269 A | 0.325000 | 0.167382 | 269 A | 0.496667 | 0.111455 |
| 270 U | 0.320000 | 0.040825 | 270 U | 0.346667 | 0.108730 |
| 271 G | 0.005000 | 0.004082 | 271 G | 0.120000 | 0.085245 |
| 272 G | 0.170000 | 0.106145 | 272 G | 0.030000 | 0.024495 |
| 273 G | 0.090000 | 0.073485 | 273 G | 0.003333 | 0.004714 |
| 274 G | 0.075000 | 0.061237 | 274 G | 0.000000 | 0.000000 |
| 275 C | 0.000000 | 0.000000 | 275 C | 0.243333 | 0.047842 |
| 276 A | 0.060000 | 0.016330 | 276 A | 0.000000 | 0.000000 |
| 277 A | 0.020000 | 0.016330 | 277 A | 0.006667 | 0.009428 |
| 278 G | 0.150000 | 0.097980 | 278 G | 0.873333 | 0.281109 |
| 279 A | 1.180000 | 0.114310 | 279 A | 2.106667 | 0.099778 |
| 280 A | 1.380000 | 0.138804 | 280 A | 0.496667 | 0.054365 |
| 281 U | 1.905000 | 0.224537 | 281 U | 0.793333 | 0.032998 |
| 282 U | 1.280000 | 0.285774 | 282 U | 0.863333 | 0.054365 |
| 283 A | 2.865000 | 0.232702 | 283 A | 0.156667 | 0.028674 |
| 284 U | 2.210000 | 0.081650 | 284 U | 0.000000 | 0.000000 |
| 285 U | 1.500000 | 0.130639 | 285 C | 0.000000 | 0.000000 |
| 286 A | 1.700000 | 0.073485 | 286 U | 0.000000 | 0.000000 |
| 287 A | 1.140000 | 0.016330 | 287 U | 0.023333 | 0.026247 |
| 288 A | 0.560000 | 0.065320 | 288 U | 0.076667 | 0.052493 |
| 289 G | 0.000000 | 0.000000 | 289 U | 0.080000 | 0.057155 |
| 290 A | 0.035000 | 0.028577 | 290 G | 0.003333 | 0.004714 |
| 291 C | 0.000000 | 0.000000 | 291 A | 0.000000 | 0.000000 |
| 292 A | 0.085000 | 0.004082 | 292 A | 0.003333 | 0.004714 |
| 293 C | 0.070000 | 0.024495 | 293 A | 0.033333 | 0.040277 |
| 294 G | 0.060000 | 0.024495 | 294 U | 0.106667 | 0.123648 |
| 295 G | 0.170000 | 0.016330 | 295 U | 0.190000 | 0.268701 |
| 296 G | 0.105000 | 0.012247 | 296 U | 0.630000 | 0.152971 |



|       |          |          |       |          |          |
|-------|----------|----------|-------|----------|----------|
| 297 G | 0.190000 | 0.008165 | 297 U | 0.706667 | 0.241155 |
| 298 A | 0.225000 | 0.061237 | 298 U | 0.596667 | 0.209497 |
| 299 G | 0.065000 | 0.028577 | 299 U | 0.913333 | 0.203361 |
| 300 U | 0.145000 | 0.118392 | 300 G | 0.306667 | 0.208540 |
| 301 A | 0.390000 | 0.040825 | 301 A | 0.130000 | 0.120277 |
| 302 A | 0.235000 | 0.159217 | 302 U | 0.100000 | 0.016330 |
| 303 A | 0.135000 | 0.069402 | 303 U | 0.046667 | 0.020548 |
| 304 G | 0.075000 | 0.020412 | 304 U | 0.166667 | 0.036818 |
| 305 G | 0.000000 | 0.000000 | 305 U | 0.170000 | 0.072572 |
| 306 U | 0.310000 | 0.032660 | 306 G | 0.363333 | 0.052493 |
| 307 U | 0.740000 | 0.212289 | 307 U | 0.340000 | 0.029439 |
| 308 A | 0.915000 | 0.069402 | 308 G | 0.116667 | 0.004714 |
| 309 A | 0.750000 | 0.057155 | 309 A | 0.026667 | 0.037712 |
| 310 A | 0.780000 | 0.065320 | 310 A | 0.130000 | 0.080416 |
| 311 U | 0.130000 | 0.106145 | 311 G | 0.520000 | 0.143527 |
| 312 A | 0.625000 | 0.102062 | 312 G | 0.000000 | 0.000000 |
| 313 U | 0.725000 | 0.110227 | 313 A | 0.026667 | 0.037712 |
| 314 G | 0.280000 | 0.008165 | 314 U | 0.366667 | 0.277168 |
| 315 C | 0.000000 | 0.000000 | 315 U | 1.606667 | 0.137194 |
| 316 U | 0.080000 | 0.065320 | 316 A | 1.540000 | 0.114310 |
| 317 G | 0.170000 | 0.114310 | 317 A | 1.273333 | 0.130724 |
| 318 A | 0.470000 | 0.065320 | 318 A | 0.653333 | 0.152825 |
| 319 U | 0.185000 | 0.151052 | 319 G | 0.133333 | 0.078457 |
| 320 A | 2.560000 | 0.220454 | 320 A | 0.000000 | 0.000000 |
| 321 C | 0.045000 | 0.036742 | 321 C | 0.256667 | 0.103387 |
| 322 U | 0.110000 | 0.089815 | 322 A | 0.000000 | 0.000000 |
| 323 U | 0.170000 | 0.024495 | 323 C | 0.016667 | 0.012472 |
| 324 G | 0.065000 | 0.012247 | 324 G | 0.056667 | 0.080139 |
| 325 U | 0.015000 | 0.012247 | 325 G | 0.056667 | 0.041899 |
| 326 C | 0.000000 | 0.000000 | 326 G | 0.093333 | 0.131993 |
| 327 C | 0.000000 | 0.000000 | 327 G | 0.346667 | 0.245538 |
| 328 U | 0.000000 | 0.000000 | 328 A | 0.493333 | 0.165798 |
| 329 U | 0.125000 | 0.102062 | 329 G | 0.146667 | 0.108730 |
| 330 G | 0.035000 | 0.028577 | 330 U | 0.893333 | 0.959317 |
| 331 G | 0.025000 | 0.020412 | 331 A | 2.120000 | 1.205183 |
| 332 U | 0.065000 | 0.020412 | 332 A | 0.560000 | 0.098995 |
| 333 U | 0.185000 | 0.102062 | 333 A | 0.243333 | 0.173269 |
| 334 U | 0.060000 | 0.024495 | 334 G | 0.190000 | 0.058878 |
| 335 C | 0.025000 | 0.020412 | 335 G | 0.246667 | 0.179134 |
| 336 C | 0.405000 | 0.044907 | 336 U | 0.213333 | 0.157551 |
| 337 G | 1.475000 | 0.232702 | 337 U | 1.066667 | 0.695334 |
| 338 C | 2.265000 | 0.077567 | 338 A | 2.403333 | 0.146135 |
| 339 A | 6.110000 | 1.045116 | 339 A | 2.110000 | 0.789557 |
| 340 A | 1.950000 | 0.334764 | 340 A | 0.846667 | 0.324996 |
| 341 G | 1.655000 | 0.363341 | 341 U | 1.760000 | 0.073485 |
| 342 A | 1.705000 | 0.249031 | 342 A | 1.033333 | 0.030912 |
| 343 G | 0.000000 | 0.000000 | 343 U | 0.260000 | 0.043205 |
| 344 G | 0.000000 | 0.000000 | 344 G | 0.133333 | 0.024944 |

|       |          |          |       |          |          |
|-------|----------|----------|-------|----------|----------|
| 345 G | 0.000000 | 0.000000 | 345 C | 0.046667 | 0.065997 |
| 346 A | 0.000000 | 0.000000 | 346 U | 0.000000 | 0.000000 |
| 347 A | 0.045000 | 0.028577 | 347 G | 0.130000 | 0.045461 |
| 348 C | 0.000000 | 0.000000 | 348 A | 0.980000 | 0.029439 |
| 349 C | 0.000000 | 0.000000 | 349 A | 0.626667 | 0.041096 |
| 350 A | 0.050000 | 0.040825 | 350 G | 0.510000 | 0.071181 |
| 351 U | 0.315000 | 0.257196 | 351 C | 0.203333 | 0.080554 |
| 352 A | 0.620000 | 0.073485 | 352 C | 0.066667 | 0.062361 |
| 353 G | 0.215000 | 0.004082 | 353 A | 0.113333 | 0.139603 |
| 354 A | 0.645000 | 0.061237 | 354 G | 0.203333 | 0.145220 |
| 355 U | 0.115000 | 0.093897 | 355 C | 0.060000 | 0.077889 |
| 356 A | 0.585000 | 0.142887 | 356 A | 0.066667 | 0.037712 |
| 357 U | 0.290000 | 0.236784 | 357 U | 0.060000 | 0.084853 |
| 358 U | 0.000000 | 0.000000 | 358 G | 0.320000 | 0.037417 |
| 359 A | 0.245000 | 0.191877 | 359 A | 0.320000 | 0.057155 |
| 360 A | 0.195000 | 0.159217 | 360 A | 0.286667 | 0.077603 |
| 361 A | 0.575000 | 0.085732 | 361 C | 0.523333 | 0.057927 |
| 362 C | 0.400000 | 0.024495 | 362 G | 0.396667 | 0.037712 |
| 363 G | 0.030000 | 0.024495 | 363 U | 0.570000 | 0.028284 |
| 364 G | 0.040000 | 0.032660 | 364 U | 1.126667 | 0.073182 |
| 365 U | 0.070000 | 0.057155 | 365 A | 1.823333 | 0.216384 |
| 366 G | 0.000000 | 0.000000 | 366 U | 0.236667 | 0.112645 |
| 367 G | 0.345000 | 0.273526 | 367 G | 0.673333 | 0.085765 |
|       |          |          | 368 U | 0.970000 | 0.162686 |
|       |          |          | 369 A | 0.840000 | 0.162686 |
|       |          |          | 370 G | 0.570000 | 0.114310 |
|       |          |          | 371 A | 1.386667 | 0.157973 |
|       |          |          | 372 A | 1.970000 | 0.272764 |
|       |          |          | 373 C | 6.560000 | 0.326905 |
|       |          |          | 374 A | 1.663333 | 0.419629 |
|       |          |          | 375 A | 0.780000 | 0.302435 |
|       |          |          | 376 U | 0.733333 | 0.240740 |
|       |          |          | 377 U | 0.533333 | 0.119536 |
|       |          |          | 378 G | 0.043333 | 0.054365 |
|       |          |          | 379 A | 0.086667 | 0.026247 |
|       |          |          | 380 A | 0.053333 | 0.049889 |
|       |          |          | 381 G | 0.130000 | 0.082865 |
|       |          |          | 382 C | 0.253333 | 0.065997 |
|       |          |          | 383 A | 0.000000 | 0.000000 |
|       |          |          | 384 G | 0.050000 | 0.021602 |
|       |          |          | 385 G | 0.043333 | 0.036818 |
|       |          |          | 386 C | 0.103333 | 0.077172 |
|       |          |          | 387 U | 0.166667 | 0.036818 |
|       |          |          | 388 U | 0.150000 | 0.066833 |
|       |          |          | 389 A | 0.143333 | 0.110252 |
|       |          |          | 390 C | 0.013333 | 0.018856 |
|       |          |          | 391 U | 0.203333 | 0.068475 |
|       |          |          | 392 U | 0.506667 | 0.051854 |

|     |   |          |          |
|-----|---|----------|----------|
| 393 | G | 0.123333 | 0.073182 |
| 394 | U | 0.280000 | 0.029439 |
| 395 | C | 0.746667 | 0.239768 |
| 396 | C | 0.050000 | 0.063770 |
| 397 | U | 0.000000 | 0.000000 |
| 398 | U | 0.000000 | 0.000000 |
| 399 | G | 0.000000 | 0.000000 |
| 400 | G | 0.003333 | 0.004714 |
| 401 | U | 0.006667 | 0.009428 |
| 402 | U | 0.043333 | 0.020548 |
| 403 | U | 0.010000 | 0.014142 |
| 404 | C | 0.146667 | 0.044969 |
| 405 | C | 0.556667 | 0.105304 |
| 406 | G | 2.053333 | 0.199388 |
| 407 | C | 3.826667 | 0.291471 |
| 408 | A | 5.150000 | 0.451073 |
| 409 | A | 2.210000 | 0.300998 |
| 410 | G | 1.753333 | 0.399361 |
| 411 | A | 1.863333 | 0.314784 |
| 412 | G | 0.123333 | 0.087305 |
| 413 | G | 0.103333 | 0.074087 |
| 414 | G | 0.000000 | 0.000000 |
| 415 | A | 0.010000 | 0.014142 |
| 416 | A | 0.070000 | 0.050990 |
| 417 | C | 0.000000 | 0.000000 |
| 418 | C | 0.030000 | 0.042426 |
| 419 | A | 0.366667 | 0.228959 |
| 420 | U | 0.686667 | 0.069442 |
| 421 | A | 0.263333 | 0.044969 |
| 422 | G | 0.006667 | 0.009428 |
| 423 | A | 0.910000 | 0.662873 |
| 424 | U | 1.476667 | 0.144299 |
| 425 | A | 1.373333 | 0.138163 |
| 426 | U | 1.676667 | 0.038586 |
| 427 | U | 3.360000 | 0.233666 |
| 428 | A | 1.850000 | 0.064807 |
| 429 | A | 1.026667 | 0.062361 |
| 430 | A | 0.796667 | 0.156276 |
| 431 | C | 0.423333 | 0.097411 |
| 432 | G | 0.053333 | 0.061824 |
| 433 | G | 0.190000 | 0.072572 |
| 434 | U | 0.493333 | 0.154560 |
| 435 | G | 0.046667 | 0.052493 |
| 436 | G | 0.490000 | 0.114310 |
| 437 | C | 0.433333 | 0.103387 |
| 438 | G | 1.030000 | 0.308004 |
| 439 | U | 2.483333 | 0.241155 |
| 440 | A | 1.183333 | 0.191543 |

|       |          |          |
|-------|----------|----------|
| 441 G | 0.536667 | 0.256948 |
| 442 A | 0.143333 | 0.202704 |
| 443 G | 0.000000 | 0.000000 |
| 444 U | 0.026667 | 0.037712 |
| 445 A | 0.063333 | 0.089567 |
| 446 G | 0.023333 | 0.032998 |
| 447 G | 0.000000 | 0.000000 |

## RK22

| seqNum | seqRNA | Mean value | Standard dev. |
|--------|--------|------------|---------------|
| 18     | C      | 0.016667   | 0.012472      |
| 19     | U      | 0.050000   | 0.029439      |
| 20     | U      | 0.013333   | 0.009428      |
| 21     | G      | 0.043333   | 0.020548      |
| 22     | A      | 0.163333   | 0.012472      |
| 23     | U      | 0.300000   | 0.066833      |
| 24     | C      | 0.033333   | 0.028674      |
| 25     | A      | 0.003333   | 0.004714      |
| 26     | G      | 0.143333   | 0.047140      |
| 27     | A      | 0.453333   | 0.051854      |
| 28     | A      | 0.590000   | 0.085245      |
| 29     | C      | 0.433333   | 0.196016      |
| 30     | A      | 0.456667   | 0.053125      |
| 31     | C      | 0.133333   | 0.095685      |
| 32     | U      | 0.023333   | 0.016997      |
| 33     | G      | 0.026667   | 0.009428      |
| 34     | U      | 0.000000   | 0.000000      |
| 35     | C      | 0.073333   | 0.012472      |
| 36     | U      | 0.066667   | 0.057349      |
| 37     | U      | 0.116667   | 0.090308      |
| 38     | G      | 0.216667   | 0.012472      |
| 39     | U      | 0.126667   | 0.023570      |
| 40     | C      | 0.080000   | 0.043205      |
| 41     | U      | 0.003333   | 0.004714      |
| 42     | C      | 0.010000   | 0.014142      |
| 43     | C      | 0.096667   | 0.097411      |
| 44     | A      | 0.023333   | 0.032998      |
| 45     | U      | 0.246667   | 0.092856      |
| 46     | U      | 0.400000   | 0.058878      |
| 47     | U      | 0.283333   | 0.094634      |
| 48     | C      | 0.050000   | 0.037417      |
| 49     | U      | 0.086667   | 0.069442      |
| 50     | U      | 0.196667   | 0.084984      |
| 51     | G      | 0.040000   | 0.029439      |
| 52     | U      | 0.023333   | 0.032998      |
| 53     | G      | 0.063333   | 0.063421      |
| 54     | U      | 0.040000   | 0.029439      |
| 55     | C      | 0.046667   | 0.023570      |
| 56     | U      | 0.060000   | 0.048990      |
| 57     | C      | 0.020000   | 0.016330      |
| 58     | U      | 0.000000   | 0.000000      |
| 59     | U      | 0.030000   | 0.042426      |
| 60     | G      | 0.010000   | 0.014142      |
| 61     | U      | 0.073333   | 0.052493      |
| 62     | U      | 0.773333   | 0.053125      |
| 63     | C      | 0.120000   | 0.061644      |

|     |   |          |          |
|-----|---|----------|----------|
| 64  | C | 0.000000 | 0.000000 |
| 65  | C | 0.000000 | 0.000000 |
| 66  | U | 0.056667 | 0.060185 |
| 67  | U | 0.400000 | 0.438254 |
| 68  | C | 0.890000 | 1.258650 |
| 69  | A | 0.516667 | 0.594886 |
| 70  | A | 0.500000 | 0.509313 |
| 71  | U | 0.213333 | 0.216384 |
| 72  | U | 0.063333 | 0.089567 |
| 73  | C | 0.020000 | 0.016330 |
| 74  | C | 0.000000 | 0.000000 |
| 75  | C | 0.000000 | 0.000000 |
| 76  | A | 0.086667 | 0.061824 |
| 77  | C | 0.076667 | 0.004714 |
| 78  | U | 0.120000 | 0.063770 |
| 79  | C | 0.093333 | 0.024944 |
| 80  | C | 0.066667 | 0.062361 |
| 81  | C | 0.080000 | 0.071181 |
| 82  | U | 0.060000 | 0.028284 |
| 83  | C | 0.113333 | 0.020548 |
| 84  | C | 0.096667 | 0.055578 |
| 85  | U | 0.023333 | 0.026247 |
| 86  | C | 0.000000 | 0.000000 |
| 87  | C | 0.000000 | 0.000000 |
| 88  | A | 0.086667 | 0.063421 |
| 89  | G | 0.643333 | 0.145220 |
| 90  | G | 0.700000 | 0.078740 |
| 91  | U | 1.236667 | 0.148847 |
| 92  | U | 1.256667 | 0.074087 |
| 93  | C | 0.290000 | 0.155134 |
| 94  | C | 0.186667 | 0.140791 |
| 95  | U | 0.036667 | 0.028674 |
| 96  | A | 0.013333 | 0.009428 |
| 97  | C | 0.076667 | 0.046428 |
| 98  | U | 1.446667 | 0.081786 |
| 99  | G | 0.206667 | 0.016997 |
| 100 | U | 0.093333 | 0.082597 |
| 101 | U | 0.436667 | 0.116714 |
| 102 | G | 0.563333 | 0.116142 |
| 103 | A | 1.100000 | 0.032660 |
| 104 | U | 0.423333 | 0.061283 |
| 105 | C | 0.330000 | 0.098995 |
| 106 | C | 0.213333 | 0.088066 |
| 107 | C | 0.096667 | 0.046428 |
| 108 | G | 0.040000 | 0.049666 |
| 109 | C | 0.336667 | 0.185173 |
| 110 | G | 2.086667 | 0.259401 |
| 111 | G | 1.583333 | 0.181169 |

|     |   |           |           |
|-----|---|-----------|-----------|
| 112 | G | 0.726667  | 0.069442  |
| 113 | U | 2.070000  | 0.077889  |
| 114 | C | 0.296667  | 0.118977  |
| 115 | G | 0.093333  | 0.070396  |
| 116 | G | 0.033333  | 0.047140  |
| 117 | G | 0.000000  | 0.000000  |
| 118 | A | 0.020000  | 0.028284  |
| 119 | C | 0.050000  | 0.070711  |
| 120 | A | 1.240000  | 0.186726  |
| 121 | G | 0.403333  | 0.161314  |
| 122 | U | 0.823333  | 0.219140  |
| 123 | U | 0.773333  | 0.140554  |
| 124 | G | 0.063333  | 0.032998  |
| 125 | G | 0.030000  | 0.042426  |
| 126 | C | 0.133333  | 0.036818  |
| 127 | G | 0.043333  | 0.061283  |
| 128 | C | 0.023333  | 0.032998  |
| 129 | C | 0.000000  | 0.000000  |
| 130 | C | 0.000000  | 0.000000  |
| 131 | A | 0.033333  | 0.047140  |
| 132 | A | 0.216667  | 0.055578  |
| 133 | C | 0.076667  | 0.061283  |
| 134 | G | 0.060000  | 0.043205  |
| 135 | U | 0.090000  | 0.063770  |
| 136 | G | 0.080000  | 0.057155  |
| 137 | G | 0.023333  | 0.032998  |
| 138 | G | 0.000000  | 0.000000  |
| 139 | G | 0.146667  | 0.207418  |
| 140 | C | 0.000000  | 0.000000  |
| 141 | U | 0.040000  | 0.032660  |
| 142 | G | 0.063333  | 0.089567  |
| 143 | G | 0.543333  | 0.118415  |
| 144 | A | 0.966667  | 0.049216  |
| 145 | U | 33.220000 | 45.099628 |
| 146 | A | 1.553333  | 0.558231  |
| 147 | C | 1.303333  | 0.130213  |
| 148 | G | 0.883333  | 0.086538  |
| 149 | A | nd        | nd        |
| 150 | G | nd        | nd        |
| 151 | G | nd        | nd        |
| 152 | G | nd        | nd        |
| 153 | A | nd        | nd        |
| 154 | A | nd        | nd        |
| 155 | U | 1.330000  | 0.657419  |
| 156 | U | 0.993333  | 0.486507  |
| 157 | U | 1.183333  | 0.660421  |
| 158 | C | 0.176667  | 0.249844  |
| 159 | G | 0.026667  | 0.037712  |

|     |   |          |          |
|-----|---|----------|----------|
| 160 | U | 0.000000 | 0.000000 |
| 161 | G | 0.110000 | 0.074833 |
| 162 | A | 1.373333 | 0.040277 |
| 163 | G | 0.070000 | 0.037417 |
| 164 | G | 0.026667 | 0.024944 |
| 165 | A | 0.116667 | 0.089567 |
| 166 | A | 0.403333 | 0.126579 |
| 167 | G | 0.326667 | 0.109646 |
| 168 | A | 0.663333 | 0.089938 |
| 169 | C | 0.186667 | 0.040277 |
| 170 | G | 0.146667 | 0.020548 |
| 171 | A | 0.280000 | 0.141657 |
| 172 | C | 0.173333 | 0.131993 |
| 173 | G | 0.146667 | 0.142673 |
| 174 | C | 0.153333 | 0.176131 |
| 175 | G | 0.240000 | 0.029439 |
| 176 | U | 0.120000 | 0.094163 |
| 177 | U | 0.413333 | 0.054365 |
| 178 | C | 0.116667 | 0.049216 |
| 179 | G | 0.166667 | 0.097411 |
| 180 | C | 0.043333 | 0.030912 |
| 181 | C | 0.016667 | 0.012472 |
| 182 | G | 0.433333 | 0.046428 |
| 183 | G | 0.660000 | 0.104243 |
| 184 | C | 0.116667 | 0.164992 |
| 185 | C | 0.050000 | 0.070711 |
| 186 | G | 0.003333 | 0.004714 |
| 187 | G | 0.600000 | 0.035590 |
| 188 | C | 0.000000 | 0.000000 |
| 189 | G | 0.000000 | 0.000000 |
| 190 | A | 0.416667 | 0.065997 |
| 191 | U | 0.656667 | 0.293523 |
| 192 | U | 0.986667 | 0.328261 |
| 193 | A | 0.480000 | 0.265456 |
| 194 | A | 0.313333 | 0.168589 |
| 195 | A | 0.143333 | 0.078457 |
| 196 | A | 0.133333 | 0.020548 |
| 197 | G | 0.113333 | 0.046428 |
| 198 | U | 0.216667 | 0.091043 |
| 199 | G | 0.306667 | 0.044969 |
| 200 | A | 0.430000 | 0.069761 |
| 201 | A | 0.506667 | 0.026247 |
| 202 | A | 0.280000 | 0.045461 |
| 203 | G | 0.333333 | 0.028674 |
| 204 | U | 0.630000 | 0.058878 |
| 205 | A | 0.540000 | 0.037417 |
| 206 | A | 0.553333 | 0.049889 |
| 207 | A | 0.353333 | 0.023570 |



|       |          |          |
|-------|----------|----------|
| 208 C | 0.173333 | 0.123648 |
| 209 U | 0.180000 | 0.071181 |
| 210 C | 0.010000 | 0.014142 |
| 211 U | 0.136667 | 0.004714 |
| 212 C | 0.316667 | 0.012472 |
| 213 G | 0.170000 | 0.021602 |
| 214 A | 0.500000 | 0.016330 |
| 215 A | 0.506667 | 0.024944 |
| 216 A | 0.336667 | 0.065997 |
| 217 G | 0.503333 | 0.026247 |
| 218 U | 0.950000 | 0.008165 |
| 219 A | 1.166667 | 0.030912 |
| 220 A | 0.873333 | 0.033993 |
| 221 G | 0.746667 | 0.020548 |
| 222 U | 0.836667 | 0.098093 |
| 223 G | 0.356667 | 0.083400 |
| 224 U | 0.780000 | 0.057155 |
| 225 U | 0.693333 | 0.066500 |
| 226 G | 0.120000 | 0.008165 |
| 227 C | 0.030000 | 0.042426 |
| 228 G | 0.390000 | 0.064807 |
| 229 C | 0.020000 | 0.014142 |
| 230 U | 0.116667 | 0.136951 |
| 231 C | 0.336667 | 0.112645 |
| 232 G | 0.946667 | 0.044969 |
| 233 G | 0.990000 | 0.223756 |
| 234 A | 1.943333 | 0.378183 |
| 235 U | 1.833333 | 0.515256 |
| 236 A | 0.840000 | 0.459783 |
| 237 U | 0.670000 | 0.273130 |
| 238 G | 0.126667 | 0.089938 |
| 239 G | 0.006667 | 0.009428 |
| 240 G | 0.016667 | 0.023570 |
| 241 G | 0.046667 | 0.065997 |
| 242 C | 0.160000 | 0.179072 |
| 243 A | 0.160000 | 0.126754 |
| 244 A | 0.000000 | 0.000000 |
| 245 G | 0.153333 | 0.047842 |
| 246 A | 0.930000 | 0.058878 |
| 247 A | 1.136667 | 0.054365 |
| 248 U | 1.710000 | 0.069761 |
| 249 U | 1.810000 | 0.155134 |
| 250 A | 2.806667 | 0.222910 |
| 251 U | 2.433333 | 0.221711 |
| 252 U | 1.913333 | 0.428200 |
| 253 A | 1.830000 | 0.254558 |
| 254 A | 1.353333 | 0.365361 |
| 255 A | 0.603333 | 0.177451 |

|     |   |          |          |
|-----|---|----------|----------|
| 256 | G | 0.000000 | 0.000000 |
| 257 | A | 0.000000 | 0.000000 |
| 258 | C | 0.000000 | 0.000000 |
| 259 | A | 0.046667 | 0.065997 |
| 260 | C | 0.033333 | 0.047140 |
| 261 | G | 0.070000 | 0.040825 |
| 262 | G | 0.093333 | 0.009428 |
| 263 | G | 0.080000 | 0.021602 |
| 264 | G | 0.206667 | 0.065490 |
| 265 | A | 0.233333 | 0.038586 |
| 266 | G | 0.110000 | 0.016330 |
| 267 | U | 0.413333 | 0.169967 |
| 268 | A | 0.416667 | 0.047842 |
| 269 | A | 0.103333 | 0.081786 |
| 270 | A | 0.146667 | 0.020548 |
| 271 | G | 0.186667 | 0.102089 |
| 272 | G | 0.033333 | 0.047140 |
| 273 | U | 0.410000 | 0.117757 |
| 274 | U | 1.256667 | 0.157551 |
| 275 | A | 1.000000 | 0.136382 |
| 276 | A | 0.803333 | 0.089938 |
| 277 | A | 0.750000 | 0.043205 |
| 278 | U | 0.290000 | 0.092014 |
| 279 | A | 0.393333 | 0.052493 |
| 280 | U | 0.506667 | 0.133000 |
| 281 | G | 0.156667 | 0.103387 |
| 282 | C | 0.003333 | 0.004714 |
| 283 | U | 0.203333 | 0.146591 |
| 284 | G | 0.410000 | 0.043205 |
| 285 | A | 0.666667 | 0.075425 |
| 286 | U | 0.543333 | 0.286628 |
| 287 | A | 2.520000 | 0.240555 |
| 288 | C | 0.106667 | 0.105304 |
| 289 | U | 0.256667 | 0.089567 |
| 290 | U | 0.253333 | 0.055578 |
| 291 | G | 0.120000 | 0.028284 |
| 292 | U | 0.113333 | 0.059067 |
| 293 | C | 0.016667 | 0.023570 |
| 294 | C | 0.006667 | 0.009428 |
| 295 | U | 0.046667 | 0.033993 |
| 296 | U | 0.160000 | 0.113431 |
| 297 | G | 0.046667 | 0.046428 |
| 298 | G | 0.106667 | 0.024944 |
| 299 | U | 0.093333 | 0.044969 |
| 300 | U | 0.063333 | 0.012472 |
| 301 | U | 0.030000 | 0.024495 |
| 302 | C | 0.033333 | 0.040277 |
| 303 | C | 0.406667 | 0.178201 |

|     |   |          |          |
|-----|---|----------|----------|
| 304 | G | 1.176667 | 0.389644 |
| 305 | C | 2.653333 | 0.576040 |
| 306 | A | 5.673333 | 0.282882 |
| 307 | A | 2.066667 | 0.172498 |
| 308 | G | 1.790000 | 0.246577 |
| 309 | A | 1.980000 | 0.213542 |
| 310 | G | 0.070000 | 0.085245 |
| 311 | G | 0.000000 | 0.000000 |
| 312 | G | 0.020000 | 0.014142 |
| 313 | A | 0.006667 | 0.009428 |
| 314 | A | 0.046667 | 0.036818 |
| 315 | C | 0.086667 | 0.122565 |
| 316 | C | 0.000000 | 0.000000 |
| 317 | A | 0.300000 | 0.090921 |
| 318 | U | 0.866667 | 0.259786 |
| 319 | A | 0.540000 | 0.145144 |
| 320 | G | 0.270000 | 0.088318 |
| 321 | A | 0.783333 | 0.515450 |
| 322 | U | 0.726667 | 0.310841 |
| 323 | A | 0.903333 | 0.046428 |
| 324 | U | 0.833333 | 0.153261 |
| 325 | U | 0.173333 | 0.245130 |
| 326 | A | 0.650000 | 0.102307 |
| 327 | A | 0.413333 | 0.044969 |
| 328 | A | 0.420000 | 0.024495 |
| 329 | C | 0.320000 | 0.084853 |
