# Supplementary material
Source: publisher figshare collection journal article supplement (https://tandf.figshare.com/articles/dataset/_/7731164)

# Figure 4

hSHAPE Reactivity

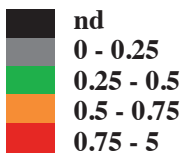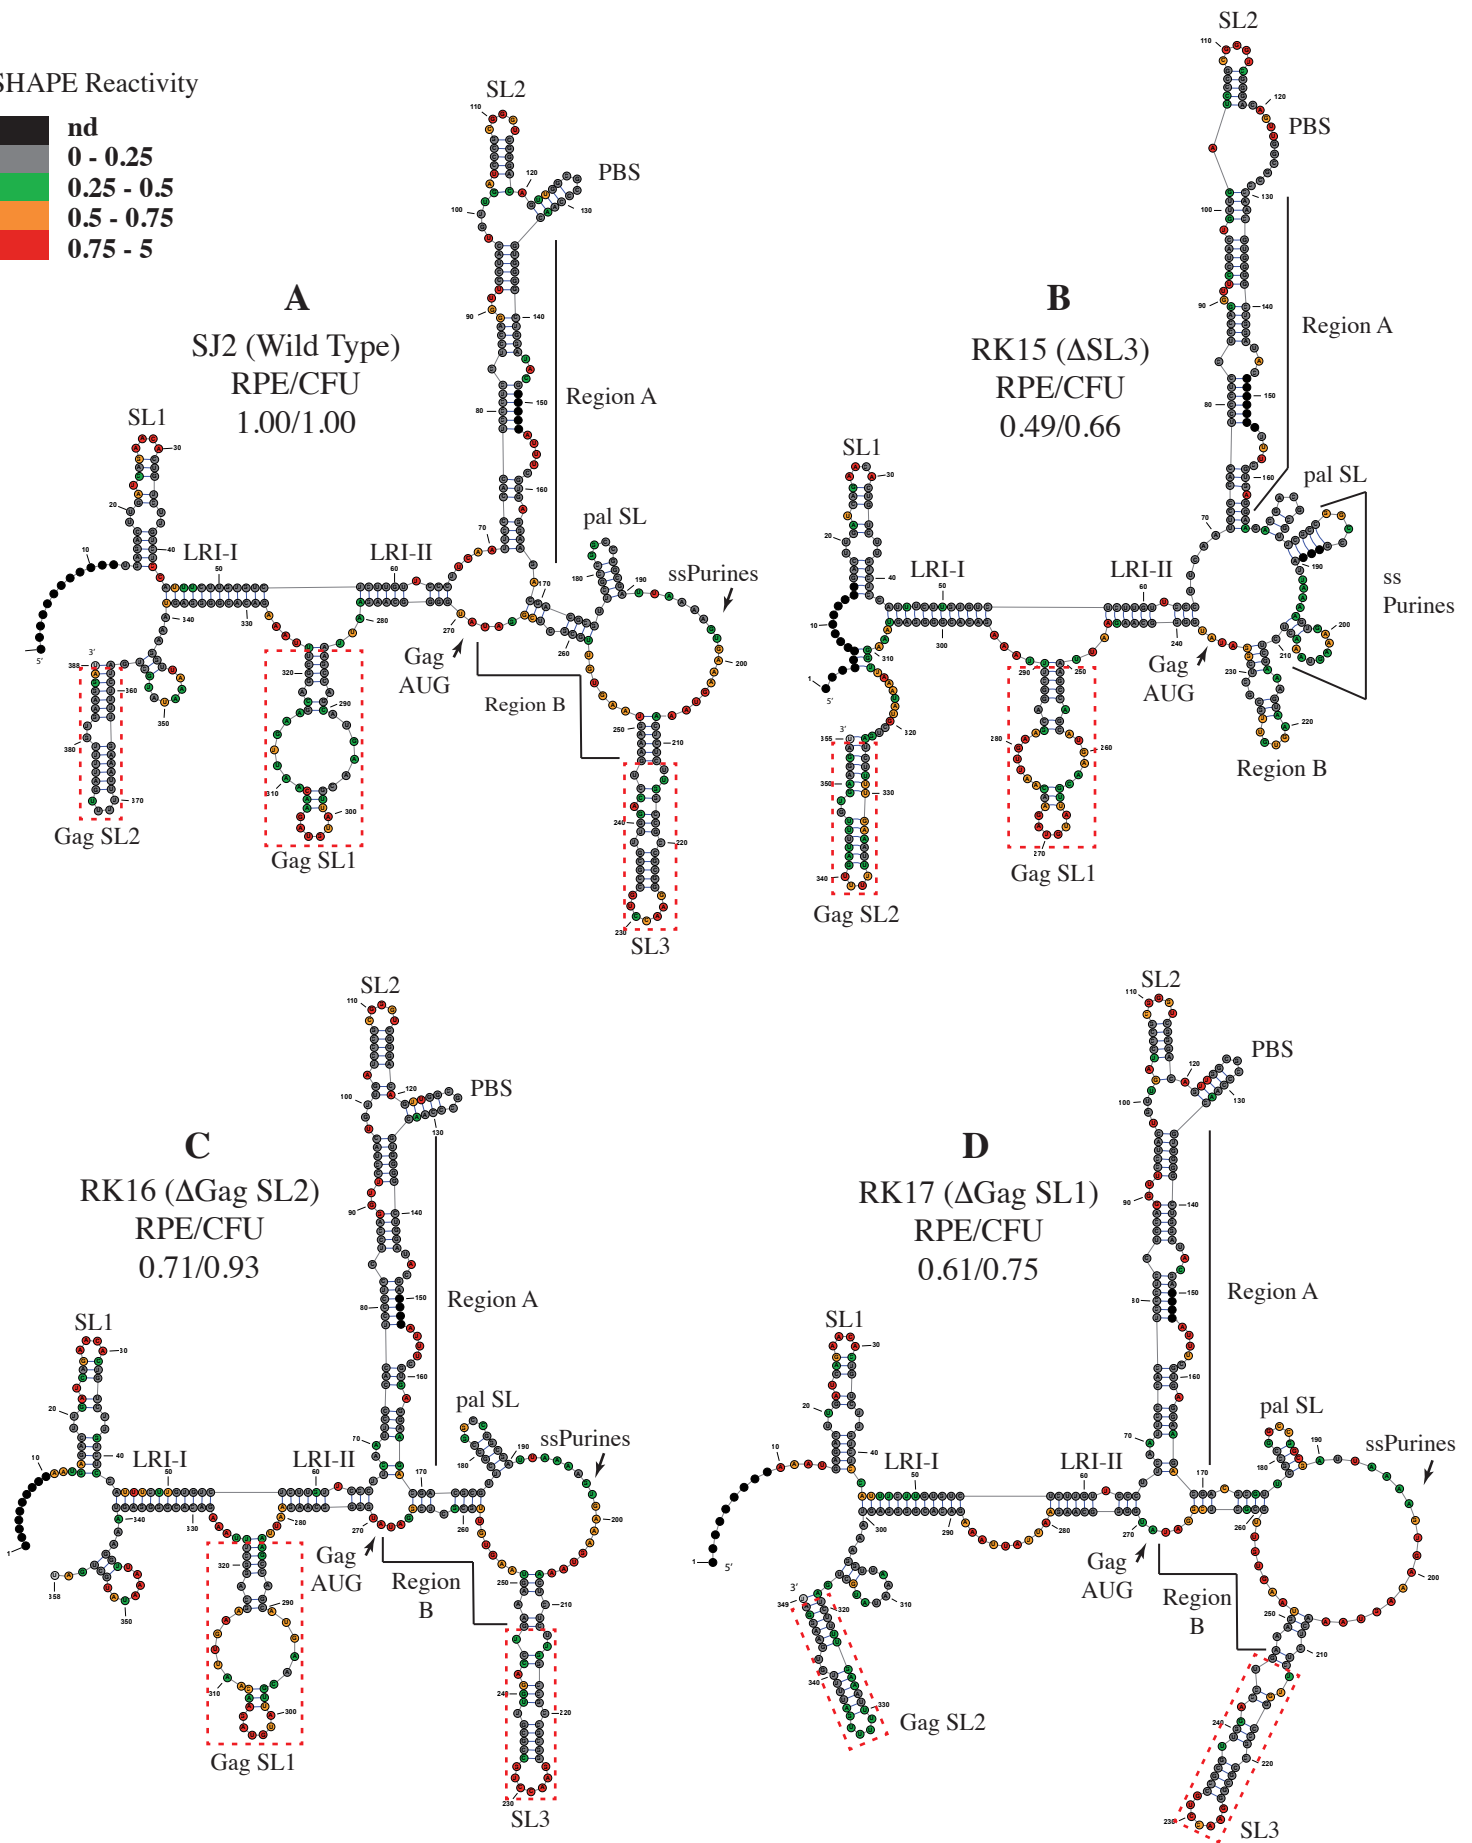

Supplement: Supplementary file 3 [file 1]

**Figure 6**

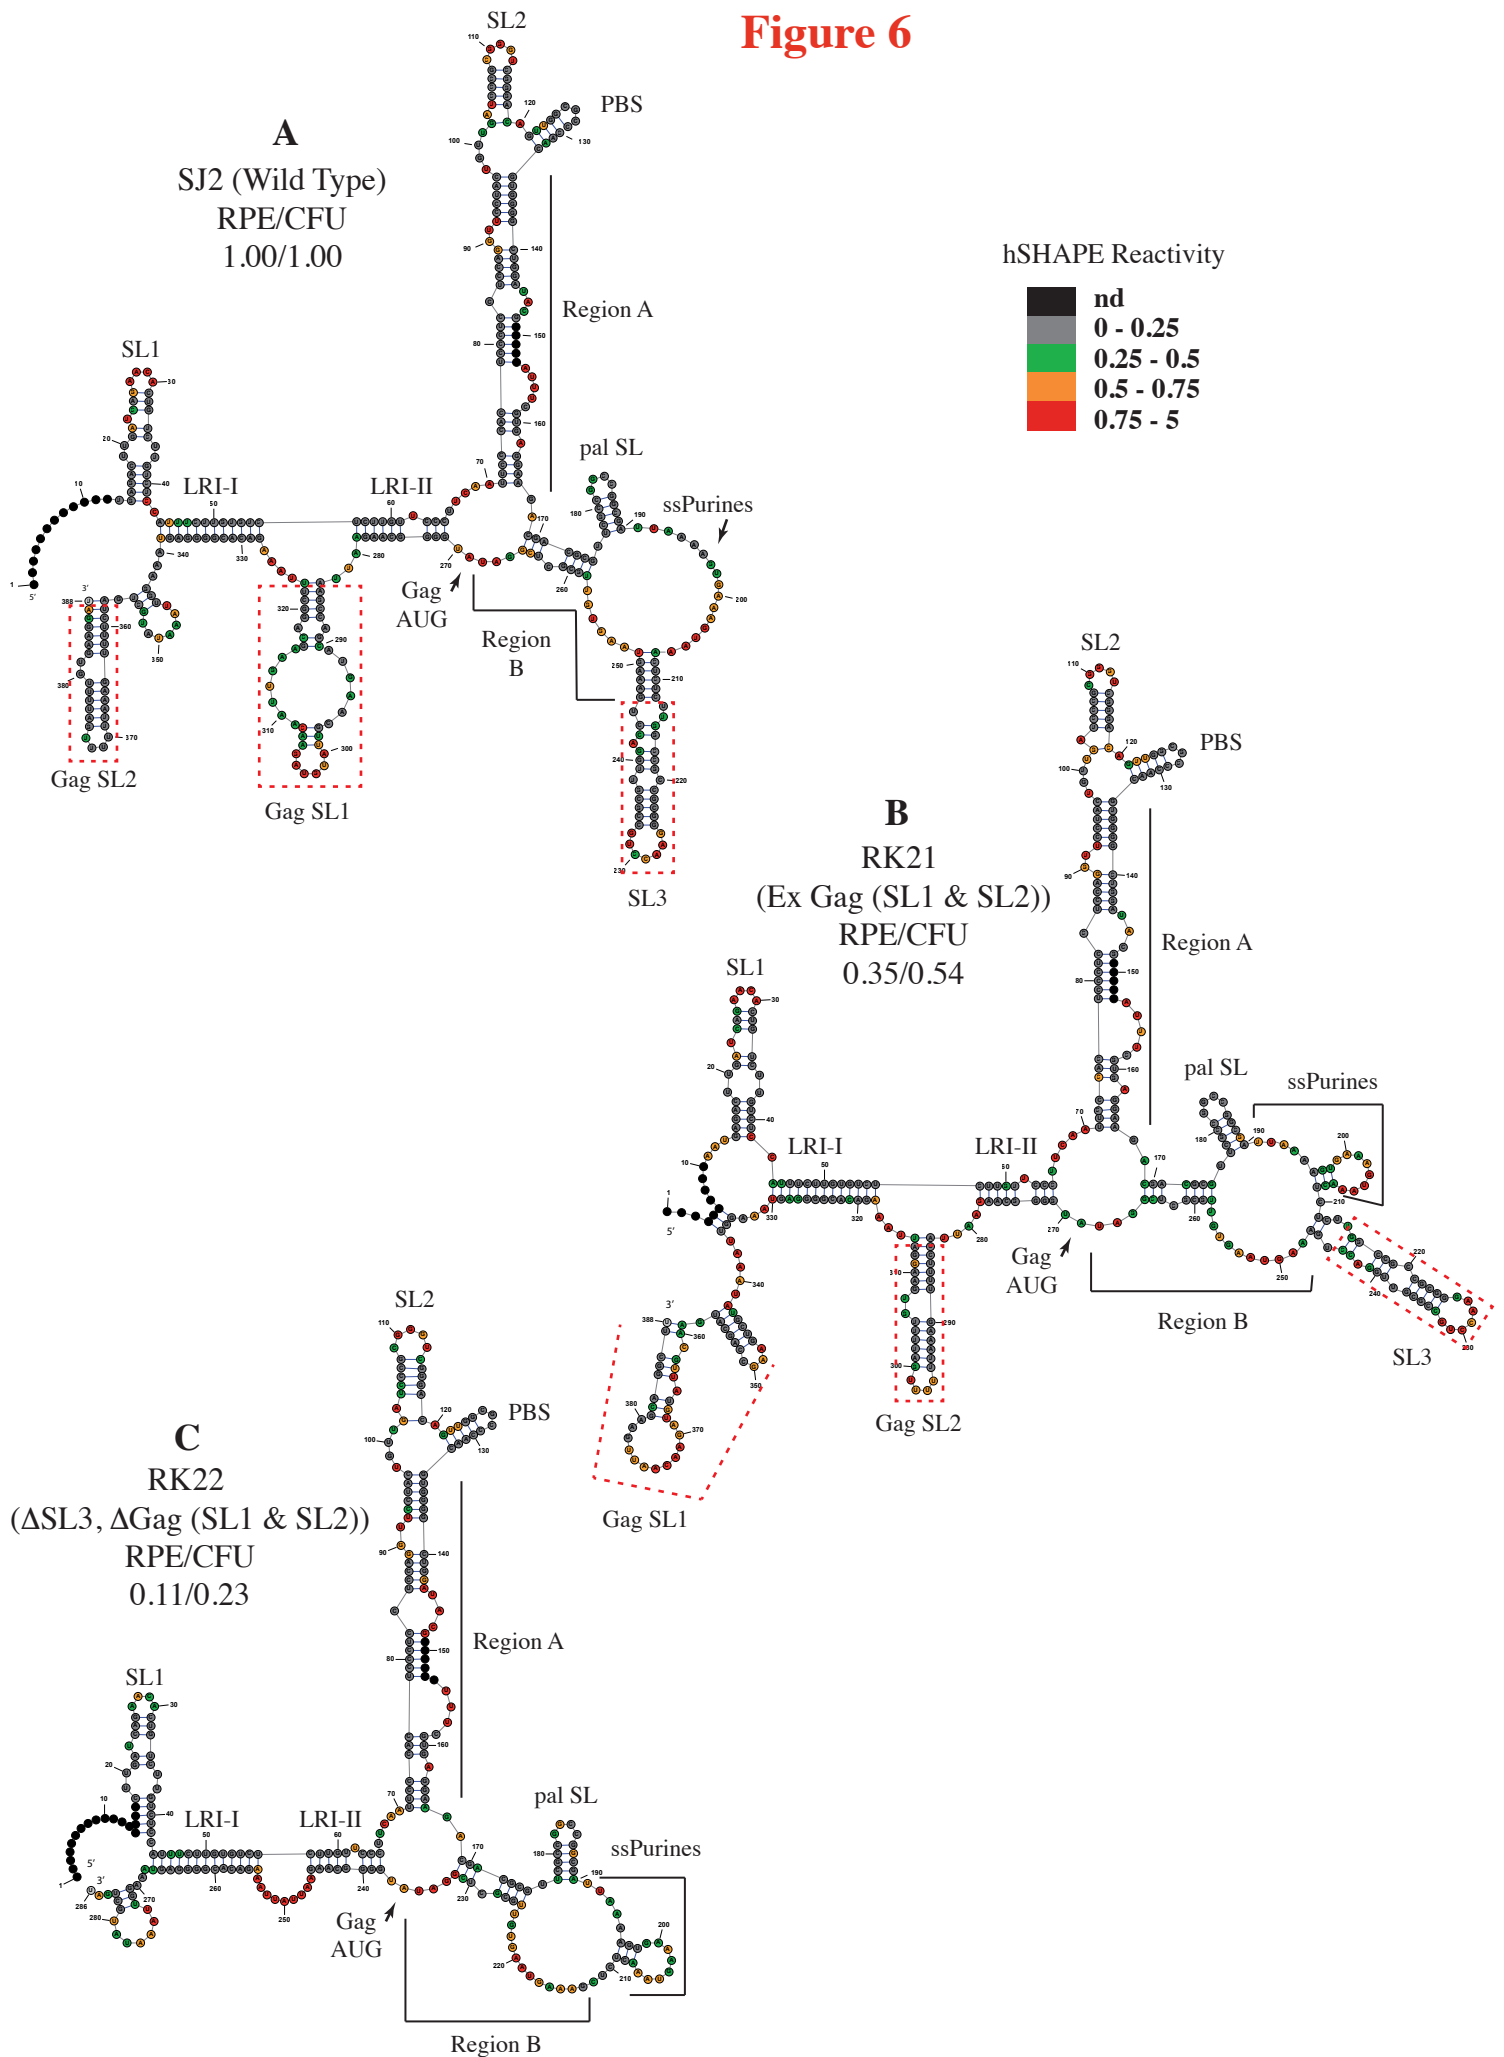

Supplement: Supplementary file 4 [file 1]

**Figure 5**

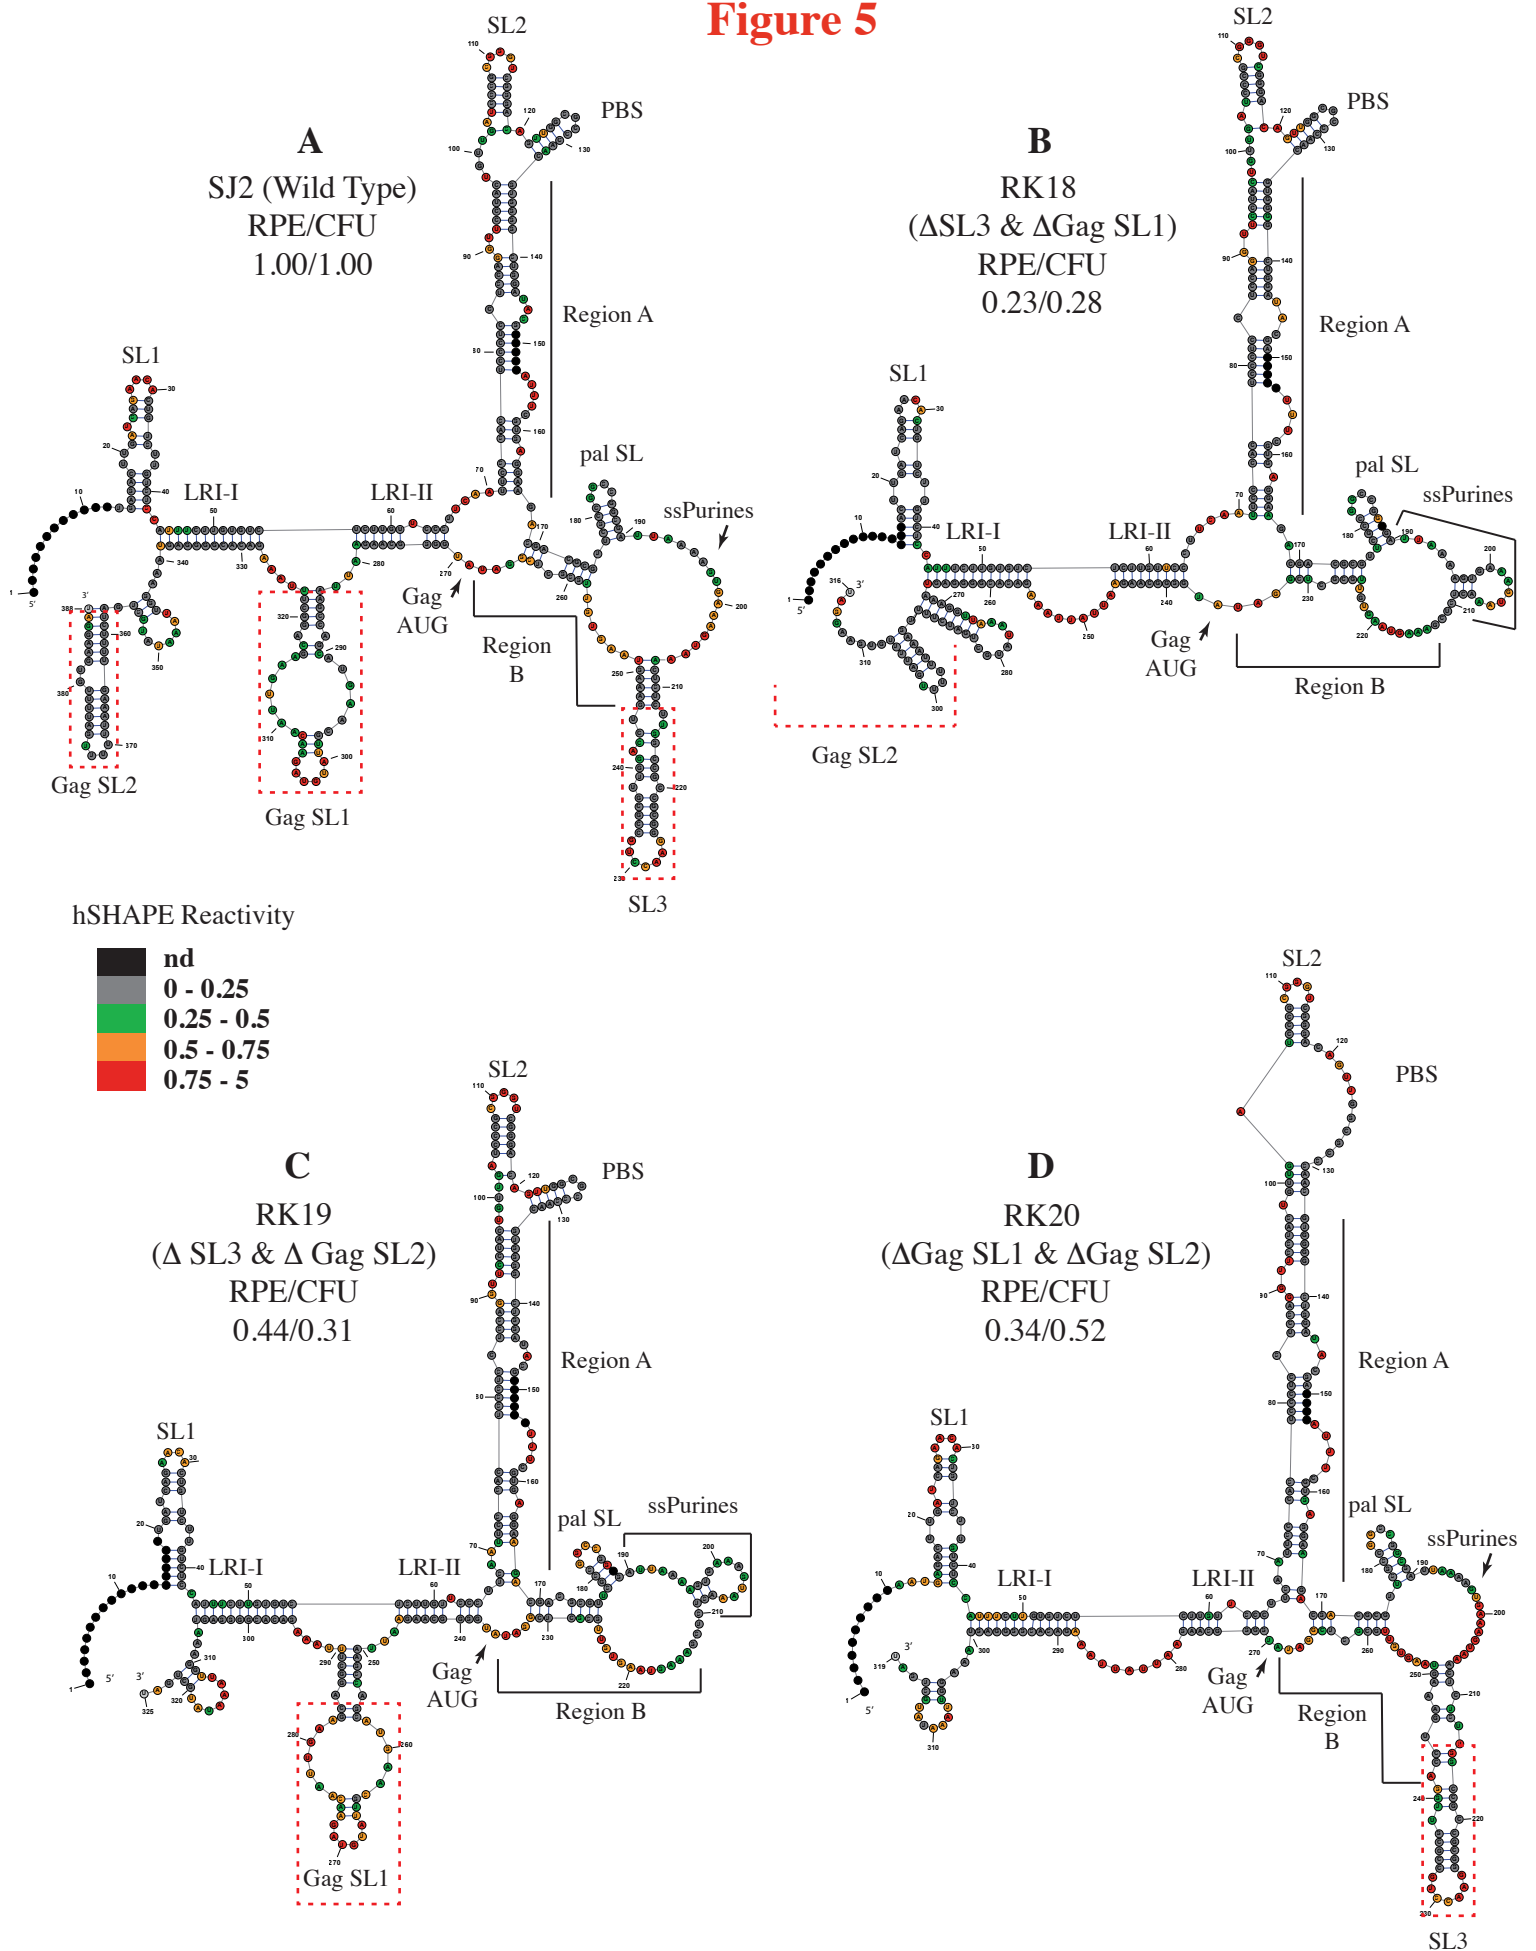

Supplement: Supplementary file 6 [file 1]
